# Supplementary material for: Enantiodivergent intermolecular hydroamination of acyclic 1,3-dienes using aniline nucleophiles
Source: Royal Society of Chemistry journal article supplement (doi:10.1039/d5qo01645b), 2026-01-01
Supplement: d5qo01645b1.pdf [file d5qo01645b1.pdf]

## Supplementary Information

### Enantiodivergent Intermolecular Hydroamination of Acyclic 1,3-Dienes

#### Using Aniline Nucleophiles

Tianlei Ren and Huan Cong\*

*Key Laboratory of Photochemical Conversion and Optoelectronic Materials, CAS-HKU Joint Laboratory on New Materials, Technical Institute of Physics and Chemistry; School of Future Technology, University of Chinese Academy of Sciences, Chinese Academy of Sciences, Beijing, 100190, China.*

*\*E-mail: hcong@mail.ipc.ac.cn*

#### Table of Contents

|                                                                                |            |
|--------------------------------------------------------------------------------|------------|
| <b>I. General Information .....</b>                                            | <b>S2</b>  |
| <b>II. Preparation of Diene Substrates .....</b>                               | <b>S3</b>  |
| <b>III. Optimization of the Reaction Conditions for <i>R</i>-Products.....</b> | <b>S4</b>  |
| <b>IV. Optimization of the Reaction Conditions for <i>S</i>-Products .....</b> | <b>S9</b>  |
| <b>V. Substrate Scope .....</b>                                                | <b>S14</b> |
| <b>VI. Crystallographic Data .....</b>                                         | <b>S34</b> |
| <b>VII. References .....</b>                                                   | <b>S35</b> |
| <b>VIII. Copies of NMR and HPLC Spectra .....</b>                              | <b>S36</b> |

## I. General Information

$^1\text{H}$  NMR spectra were recorded with a Bruker Avance 400 at 25 °C and internally referenced to tetramethylsilane signal.  $^{13}\text{C}$  NMR spectra were recorded with a Bruker Avance 400 at 25 °C and internally referenced to residual solvent signals ( $\text{CDCl}_3$ :  $\delta$  77.0). Data for  $^1\text{H}$  NMR were reported as follows: chemical shift ( $\delta$  ppm), integration, multiplicity (s = singlet, d = doublet, t = triplet, q = quartet, m = multiplet, br = broad), and coupling constant (Hz) when applicable.  $^{13}\text{C}$  NMR spectra were recorded with complete proton decoupling. High-resolution mass spectrometry experiments were performed with a Bruker Daltonics Apex IV spectrometer. Chiral HPLC analyses were carried out on a Shimadzu LC-20AD system. Infrared spectra were recorded on a Varian 3100 FT-IR. Specific rotations were measured on a Jasco P-2000 Polarimeter.

All reactions were carried out using flame-dried glassware under a nitrogen atmosphere unless otherwise noted. Analytical thin layer chromatography (TLC) was performed using 0.25 mm silica gel 60-F plates. Flash chromatography was performed using 200-400 mesh silica gel. HPLC-grade tetrahydrofuran, methylene chloride, diethyl ether and toluene were purified and dried by passing through a PURE SOLV<sup>®</sup> solvent purification system (Innovative Technology, Inc.). **L1** and **L2** ligands were prepared according to the reported procedure.<sup>[S1]</sup> Chemical reagents were purchased from Adamas, Energy Chemicals, J&K, Innochem or Macklin and used without purification.

## II. Preparation of Diene Substrates

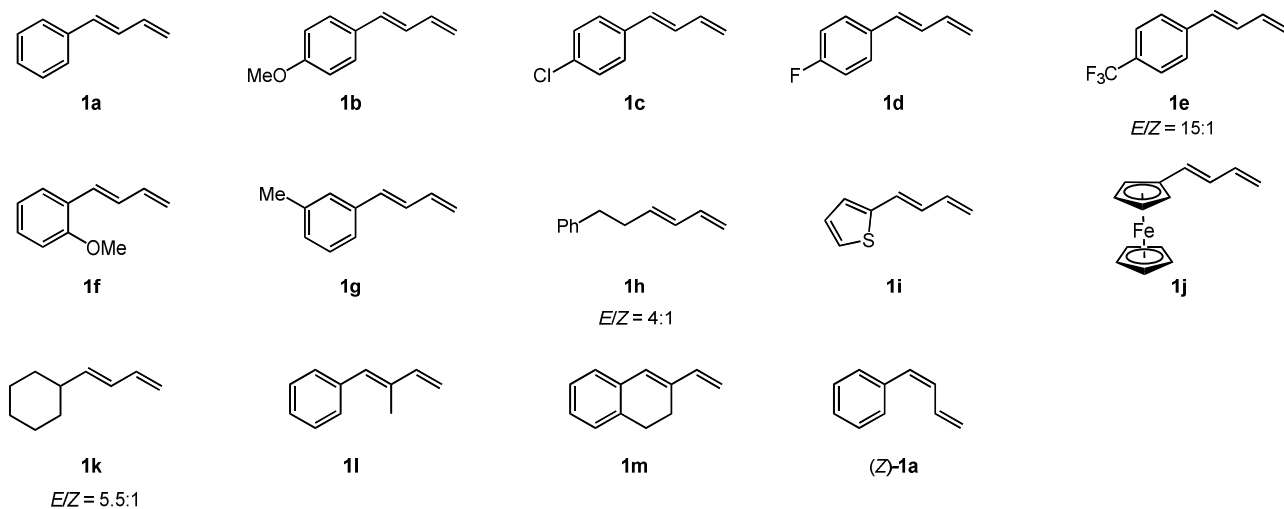

Diene substrates **1a**, **1b**, **1c**, **1d**, **1f**, **1l**, and **1m** were prepared according to the procedure reported by Yin et al.<sup>[S2]</sup> Diene substrates **1e**, **1g**, **1h**, **1i**, **1j**, and **1k** were prepared according to the procedure reported by Fernandes et al.<sup>[S3]</sup> Diene substrate (Z)-**1a** was prepared according to the procedure reported by Malcolmson et al.<sup>[S4]</sup>

### III. Optimization of the Reaction Conditions for *R*-Products

**Table S1.** Optimization of additive loadings.

Reaction scheme showing the conversion of **1a** (0.1 mmol scale) and **2a** (2.0 equiv) to **(R)-3aa** using  $[\text{Pd}(\eta^3\text{-C}_3\text{H}_5)\text{Cl}]_2$  (1 mol%),  $(S_a,S_p)\text{-L1}$  (2.4 mol%), and **A6** (X equiv) in toluene at 25 °C for 16 h ( $c = 0.2 \text{ M}$ ).

| Entry | A6        | Yield (%) <sup>[a]</sup> | <i>ee</i> (%) <sup>[b]</sup> |
|-------|-----------|--------------------------|------------------------------|
| 1     | 0.1 equiv | 32                       | 94                           |
| 2     | 0.5 equiv | 51                       | 93                           |
| 3     | 1.0 equiv | 61                       | 92                           |
| 4     | 2.0 equiv | 54                       | 86                           |

[a] Determined by  $^1\text{H}$  NMR analysis of the crude reaction mixture using 1,3,5-trimethoxybenzene as the internal standard. [b] The *ee* values of **(R)-3aa** were determined by HPLC analysis on a chiral stationary phase.

**Table S2.** Screening of bases.

Reaction scheme showing the conversion of **1a** (0.1 mmol scale) and **2a** (2.0 equiv) to **(R)-3aa** using  $[\text{Pd}(\eta^3\text{-C}_3\text{H}_5)\text{Cl}]_2$  (1 mol%),  $(S_a,S_p)\text{-L1}$  (2.4 mol%), **A6** (0.5 equiv), and **Base** (2.0 equiv) in toluene at 25 °C for 16 h ( $c = 0.2 \text{ M}$ ).

| Entry | Base                            | Yield (%) <sup>[a]</sup> | <i>ee</i> (%) <sup>[b]</sup> |
|-------|---------------------------------|--------------------------|------------------------------|
| 1     | none                            | 51                       | 93                           |
| 2     | LiOAc                           | 44                       | 94                           |
| 3     | NaOAc                           | 86                       | 93                           |
| 4     | KOAc                            | 62                       | 92                           |
| 5     | CsOAc                           | 14                       | 84                           |
| 6     | Na <sub>2</sub> CO <sub>3</sub> | 63                       | 80                           |
| 7     | Na <sub>3</sub> PO <sub>4</sub> | 93                       | 86                           |
| 8     | Et <sub>3</sub> N               | 5                        | 87                           |
| 9     | DBU                             | <2                       | -                            |

[a] Determined by  $^1\text{H}$  NMR analysis of the crude reaction mixture using 1,3,5-trimethoxybenzene as the internal standard. [b] The *ee* values of **(R)-3aa** were determined by HPLC analysis on a chiral stationary phase.

**Table S3.** Screening of solvents.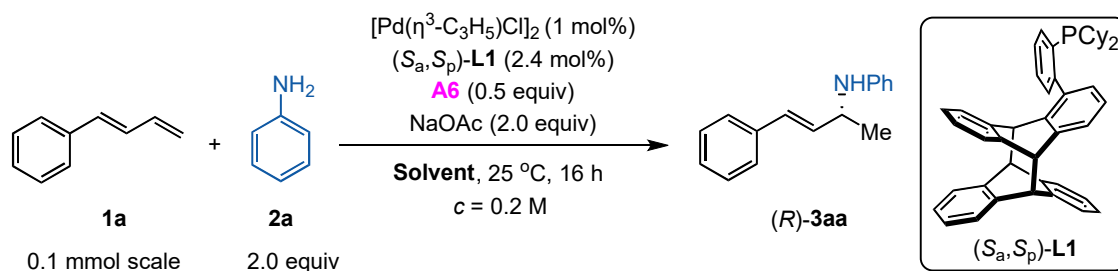

| Entry | Solvent            | Yield (%) <sup>[a]</sup> | ee (%) <sup>[b]</sup> |
|-------|--------------------|--------------------------|-----------------------|
| 1     | toluene            | 86                       | 93                    |
| 2     | fluorobenzene      | 79                       | 85                    |
| 3     | benzotrifluoride   | 37                       | 87                    |
| 4     | chlorobenzene      | 46                       | 89                    |
| 5     | THF                | <2                       | -                     |
| 6     | 1,4-dioxane        | <2                       | -                     |
| 7     | DCE                | 87                       | 72                    |
| 8     | DMF                | <2                       | -                     |
| 9     | CH <sub>3</sub> CN | 86                       | 58                    |

[a] Determined by <sup>1</sup>H NMR analysis of the crude reaction mixture using 1,3,5-trimethoxybenzene as the internal standard. [b] The ee values of (*R*)-**3aa** were determined by HPLC analysis on a chiral stationary phase.

**Table S4.** Optimization of concentrations.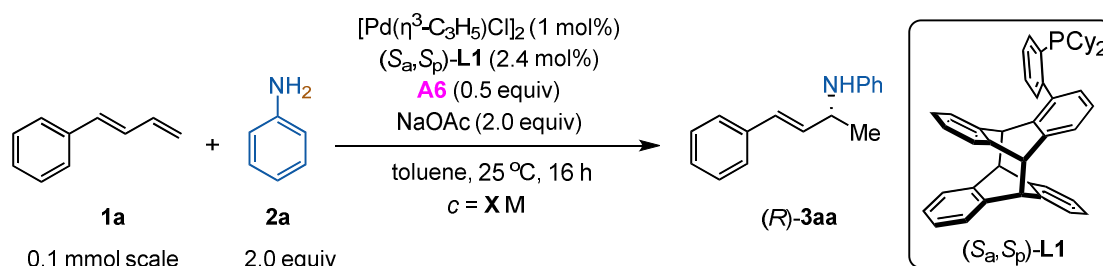

| Entry | Conc. | Yield (%) <sup>[a]</sup> | ee (%) <sup>[b]</sup> |
|-------|-------|--------------------------|-----------------------|
| 1     | 0.1 M | 52                       | 93                    |
| 2     | 0.2 M | 86                       | 93                    |
| 3     | 0.4 M | 91                       | 92                    |

[a] Determined by <sup>1</sup>H NMR analysis of the crude reaction mixture using 1,3,5-trimethoxybenzene as the internal standard. [b] The ee values of (*R*)-**3aa** were determined by HPLC analysis on a chiral stationary phase.

**Table S5.** Optimization of reaction time.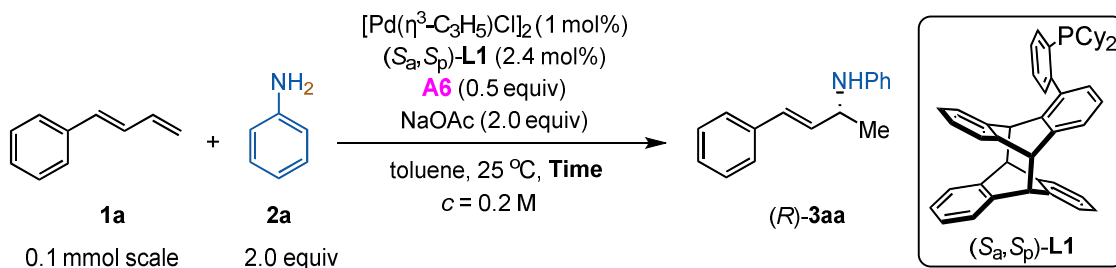

| Entry | Time | Yield (%) <sup>[a]</sup> | <i>ee</i> (%) <sup>[b]</sup> |
|-------|------|--------------------------|------------------------------|
| 1     | 8 h  | 80                       | 92                           |
| 2     | 16 h | 86                       | 93                           |
| 3     | 24 h | 92                       | 92                           |
| 4     | 36 h | 98                       | 87                           |

[a] Determined by  $^1\text{H}$  NMR analysis of the crude reaction mixture using 1,3,5-trimethoxybenzene as the internal standard. [b] The *ee* values of **(R)-3aa** were determined by HPLC analysis on a chiral stationary phase.

**Table S6.** Optimization of nucleophile loadings.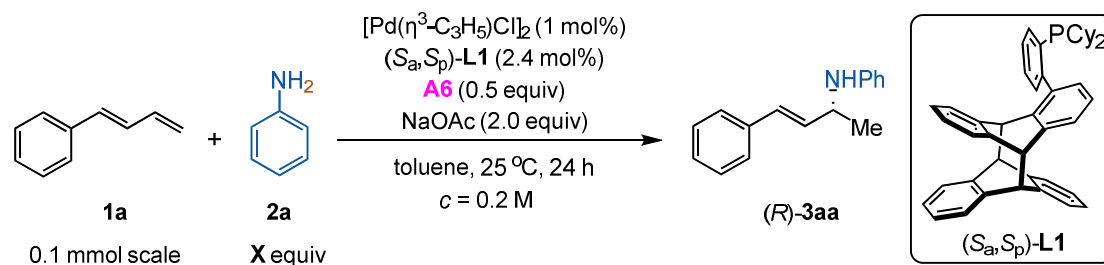

| Entry | <b>2a</b> | Yield (%) <sup>[a]</sup> | <i>ee</i> (%) <sup>[b]</sup> |
|-------|-----------|--------------------------|------------------------------|
| 1     | 2.0 equiv | 92                       | 92                           |
| 2     | 3.0 equiv | 99                       | 92                           |

[a] Determined by  $^1\text{H}$  NMR analysis of the crude reaction mixture using 1,3,5-trimethoxybenzene as the internal standard. [b] The *ee* values of **(R)-3aa** were determined by HPLC analysis on a chiral stationary phase.

**Table S7.** Screening of Pd sources.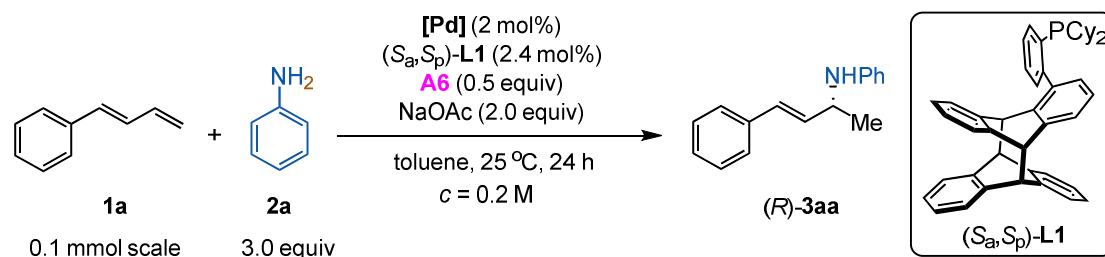

| Entry | [Pd]                                                                | Yield (%) <sup>[a]</sup> | ee (%) <sup>[b]</sup> |
|-------|---------------------------------------------------------------------|--------------------------|-----------------------|
| 1     | Pd(OAc) <sub>2</sub>                                                | <2                       | -                     |
| 2     | Pd <sub>2</sub> dba <sub>3</sub>                                    | 18                       | 92                    |
| 3     | [Pd(η <sup>3</sup> -C <sub>3</sub> H <sub>5</sub> )Cl] <sub>2</sub> | 99                       | 92                    |
| 4     | Pd G4 dimer                                                         | <2                       | -                     |

[a] Determined by <sup>1</sup>H NMR analysis of the crude reaction mixture using 1,3,5-trimethoxybenzene as the internal standard. [b] The ee values of (R)-3aa were determined by HPLC analysis on a chiral stationary phase.

**Table S8.** Optimization of temperature.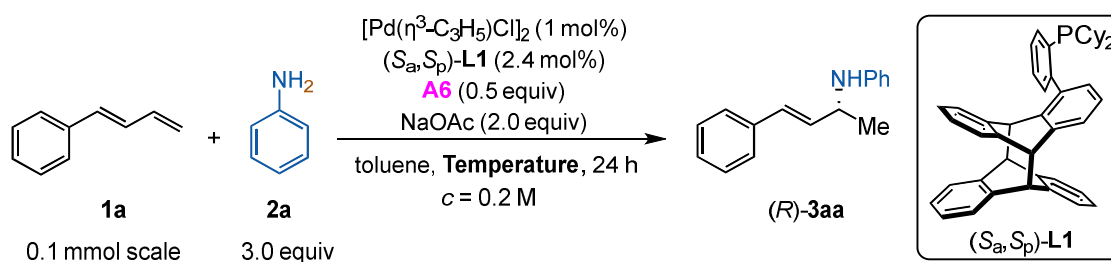

| Entry | Temperature | Yield (%) <sup>[a]</sup> | ee (%) <sup>[b]</sup> |
|-------|-------------|--------------------------|-----------------------|
| 1     | 25 °C       | 99                       | 92                    |
| 2     | 0 °C        | 13                       | 94                    |

[a] Determined by <sup>1</sup>H NMR analysis of the crude reaction mixture using 1,3,5-trimethoxybenzene as the internal standard. [b] The ee values of (R)-3aa were determined by HPLC analysis on a chiral stationary phase.

**Table S9.** Screening of ligands.

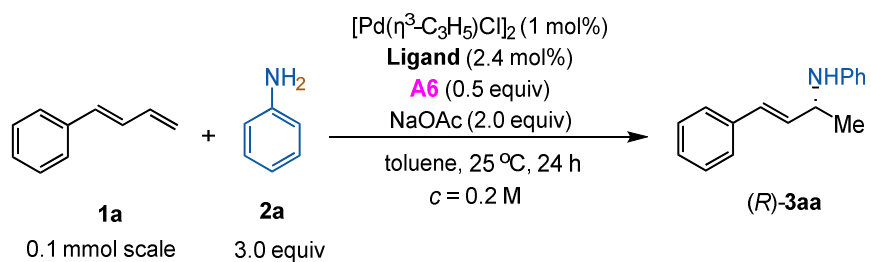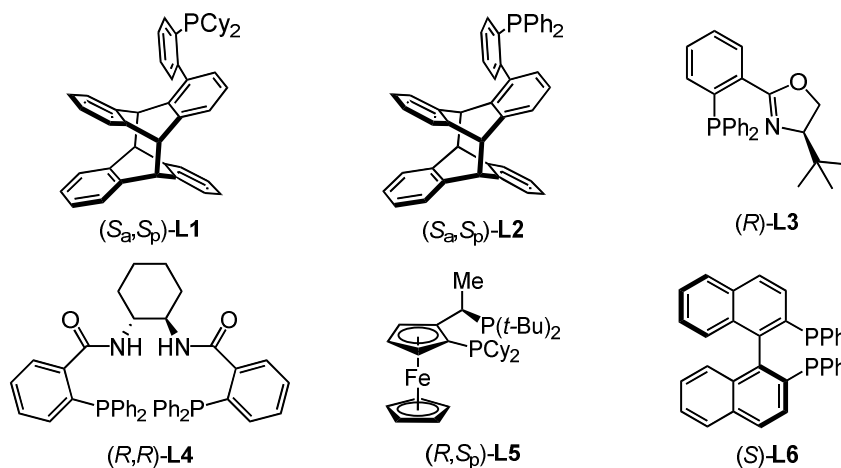

| Entry | Ligand    | Yield (%) <sup>[a]</sup> | <i>ee</i> (%) <sup>[b]</sup> |
|-------|-----------|--------------------------|------------------------------|
| 1     | <b>L1</b> | 99                       | 92                           |
| 2     | <b>L2</b> | 47                       | 65                           |
| 3     | <b>L3</b> | 43                       | 68                           |
| 4     | <b>L4</b> | 6                        | 14                           |
| 5     | <b>L5</b> | 59                       | 33                           |
| 6     | <b>L6</b> | 84                       | 5                            |

[a] Determined by <sup>1</sup>H NMR analysis of the crude reaction mixture using 1,3,5-trimethoxybenzene as the internal standard. [b] The *ee* values of (*R*)-**3aa** were determined by HPLC analysis on a chiral stationary phase.



#### IV. Optimization of the Reaction Conditions for *S*-Products

**Table S10.** Optimization of additive loadings.

Reaction scheme showing the conversion of **1a** (0.1 mmol scale) and **2a** (2.0 equiv) to **(S)-3aa** using  $[\text{Pd}(\eta^3\text{-C}_3\text{H}_5)\text{Cl}]_2$  (1 mol%),  $(S_a, S_p)\text{-L1}$  (2.4 mol%), and **A30** (X equiv) in toluene at 25 °C for 16 h ( $c = 0.2 \text{ M}$ ). The structure of  $(S_a, S_p)\text{-L1}$  is shown in a box.

| Entry | <b>A30</b> | Yield (%) <sup>[a]</sup> | <i>ee</i> (%) <sup>[b]</sup> |
|-------|------------|--------------------------|------------------------------|
| 1     | 0.1 equiv  | 20                       | 56                           |
| 2     | 0.5 equiv  | 40                       | 59                           |
| 3     | 1.0 equiv  | 59                       | 60                           |
| 4     | 2.0 equiv  | 47                       | 60                           |

[a] Determined by  $^1\text{H}$  NMR analysis of the crude reaction mixture using 1,3,5-trimethoxybenzene as the internal standard. [b] The *ee* values of **(S)-3aa** were determined by HPLC analysis on a chiral stationary phase.

**Table S11.** Screening of bases.

Reaction scheme showing the conversion of **1a** (0.1 mmol scale) and **2a** (2.0 equiv) to **(S)-3aa** using  $[\text{Pd}(\eta^3\text{-C}_3\text{H}_5)\text{Cl}]_2$  (1 mol%),  $(S_a, S_p)\text{-L1}$  (2.4 mol%), **A30** (1.0 equiv), and **Base** (2.0 equiv) in toluene at 25 °C for 16 h ( $c = 0.2 \text{ M}$ ). The structure of  $(S_a, S_p)\text{-L1}$  is shown in a box.

| Entry | Base                     | Yield (%) <sup>[a]</sup> | <i>ee</i> (%) <sup>[b]</sup> |
|-------|--------------------------|--------------------------|------------------------------|
| 1     | none                     | 59                       | 60                           |
| 2     | LiOAc                    | 58                       | 57                           |
| 3     | NaOAc                    | 88                       | 51                           |
| 4     | KOAc                     | 73                       | 37                           |
| 5     | CsOAc                    | 94                       | 45                           |
| 6     | $\text{Na}_2\text{CO}_3$ | 56                       | 51                           |
| 7     | $\text{Na}_3\text{PO}_4$ | 43                       | 48                           |
| 8     | $\text{Et}_3\text{N}$    | 14                       | 51                           |
| 9     | DBU                      | <2                       | -                            |

[a] Determined by  $^1\text{H}$  NMR analysis of the crude reaction mixture using 1,3,5-trimethoxybenzene as the internal standard. [b] The *ee* values of **(S)-3aa** were determined by HPLC analysis on a chiral stationary phase.

**Table S12.** Screening of solvents.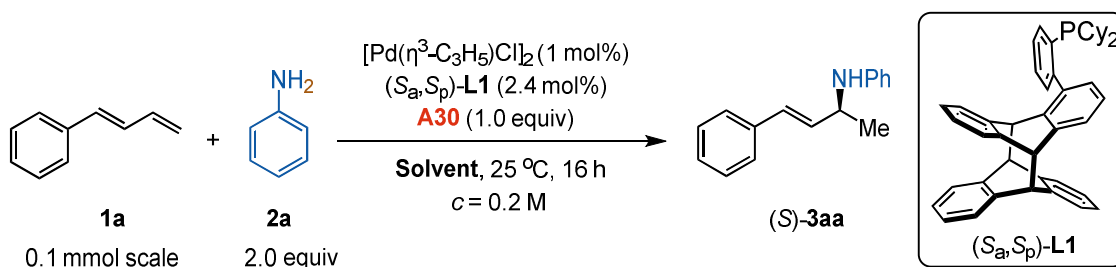

| Entry | Solvent            | Yield (%) <sup>[a]</sup> | <i>ee</i> (%) <sup>[b]</sup> |
|-------|--------------------|--------------------------|------------------------------|
| 1     | toluene            | 59                       | 60                           |
| 2     | fluorobenzene      | 40                       | 58                           |
| 3     | benzotrifluoride   | 21                       | 54                           |
| 4     | chlorobenzene      | 27                       | 59                           |
| 5     | THF                | 3                        | 55                           |
| 6     | 1,4-dioxane        | 3                        | 52                           |
| 7     | DCE                | 6                        | 59                           |
| 8     | DMF                | <2                       | -                            |
| 9     | CH <sub>3</sub> CN | 4                        | 44                           |

[a] Determined by <sup>1</sup>H NMR analysis of the crude reaction mixture using 1,3,5-trimethoxybenzene as the internal standard. [b] The *ee* values of **(S)-3aa** were determined by HPLC analysis on a chiral stationary phase.

**Table S13.** Optimization of concentrations.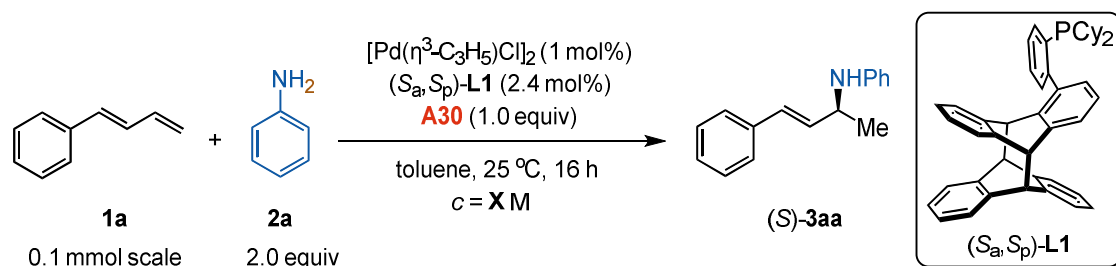

| Entry | Conc. | Yield (%) <sup>[a]</sup> | <i>ee</i> (%) <sup>[b]</sup> |
|-------|-------|--------------------------|------------------------------|
| 1     | 0.1 M | 30                       | 60                           |
| 2     | 0.2 M | 59                       | 60                           |
| 3     | 0.4 M | 73                       | 60                           |

[a] Determined by <sup>1</sup>H NMR analysis of the crude reaction mixture using 1,3,5-trimethoxybenzene as the internal standard. [b] The *ee* values of **(S)-3aa** were determined by HPLC analysis on a chiral stationary phase.

**Table S14.** Optimization of reaction time.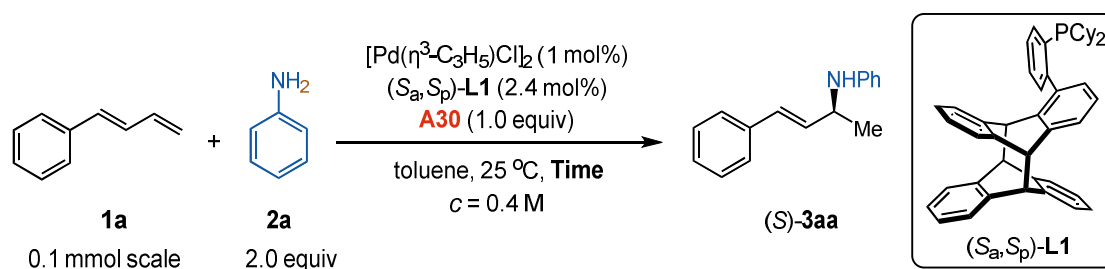

| Entry | Time | Yield (%) <sup>[a]</sup> | ee (%) <sup>[b]</sup> |
|-------|------|--------------------------|-----------------------|
| 1     | 8 h  | 64                       | 60                    |
| 2     | 16 h | 73                       | 60                    |
| 3     | 24 h | 82                       | 60                    |
| 4     | 36 h | 84                       | 59                    |

[a] Determined by  $^1\text{H}$  NMR analysis of the crude reaction mixture using 1,3,5-trimethoxybenzene as the internal standard. [b] The *ee* values of **(S)-3aa** were determined by HPLC analysis on a chiral stationary phase.

**Table S15.** Optimization of nucleophile loadings.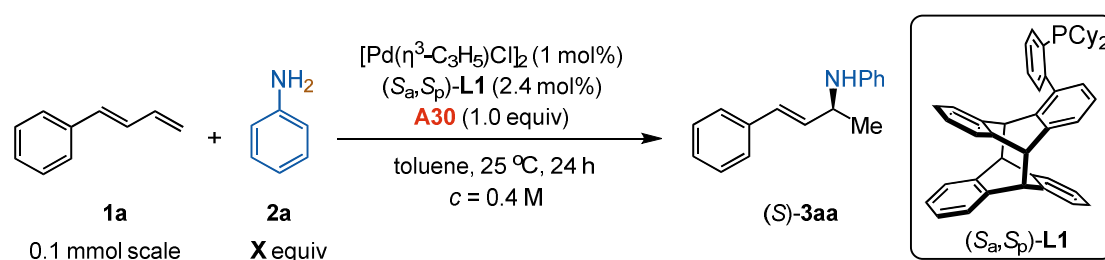

| Entry | <b>2a</b> | Yield (%) <sup>[a]</sup> | ee (%) <sup>[b]</sup> |
|-------|-----------|--------------------------|-----------------------|
| 1     | 2.0 equiv | 82                       | 60                    |
| 2     | 3.0 equiv | 86                       | 59                    |
| 3     | 4.0 equiv | 94                       | 59                    |
| 4     | 5.0 equiv | 94                       | 59                    |

[a] Determined by  $^1\text{H}$  NMR analysis of the crude reaction mixture using 1,3,5-trimethoxybenzene as the internal standard. [b] The *ee* values of **(S)-3aa** were determined by HPLC analysis on a chiral stationary phase.

**Table S16.** Screening of Pd sources.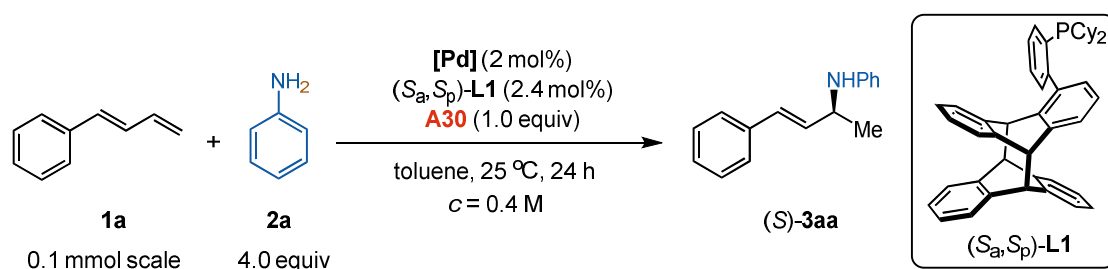

| Entry | [Pd]                                                                | Yield (%) <sup>[a]</sup> | <i>ee</i> (%) <sup>[b]</sup> |
|-------|---------------------------------------------------------------------|--------------------------|------------------------------|
| 1     | Pd(OAc) <sub>2</sub>                                                | 94                       | 53                           |
| 2     | Pd <sub>2</sub> dba <sub>3</sub>                                    | 8                        | 60                           |
| 3     | [Pd(η <sup>3</sup> -C <sub>3</sub> H <sub>5</sub> )Cl] <sub>2</sub> | 94                       | 59                           |
| 4     | Pd G4 dimer                                                         | <2                       | -                            |

[a] Determined by <sup>1</sup>H NMR analysis of the crude reaction mixture using 1,3,5-trimethoxybenzene as the internal standard. [b] The *ee* values of **(S)-3aa** were determined by HPLC analysis on a chiral stationary phase.

**Table S17.** Optimization of temperatures.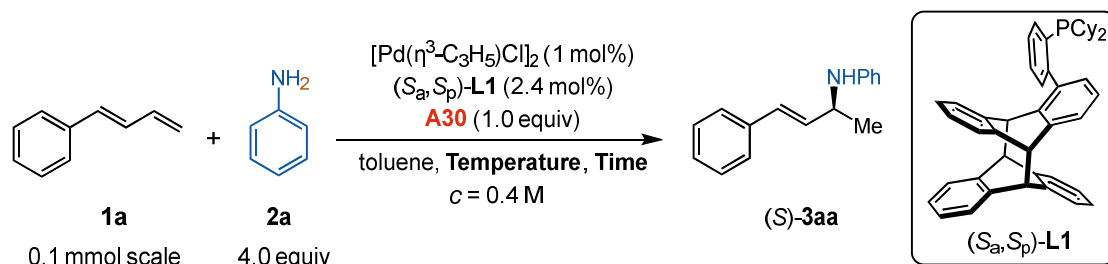

| Entry | Temperature | Time | Yield (%) <sup>[a]</sup> | <i>ee</i> (%) <sup>[b]</sup> |
|-------|-------------|------|--------------------------|------------------------------|
| 1     | 25 °C       | 24 h | 94                       | 59                           |
| 2     | 0 °C        | 40 h | 72                       | 65                           |
| 3     | 0 °C        | 48 h | 80                       | 65                           |

[a] Determined by <sup>1</sup>H NMR analysis of the crude reaction mixture using 1,3,5-trimethoxybenzene as the internal standard. [b] The *ee* values of **(S)-3aa** were determined by HPLC analysis on a chiral stationary phase.

**Table S18.** Screening of ligands.

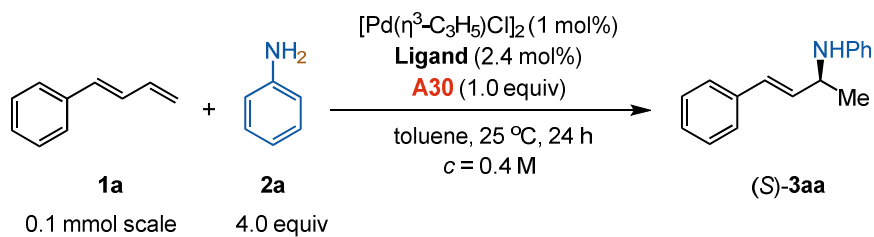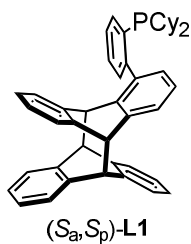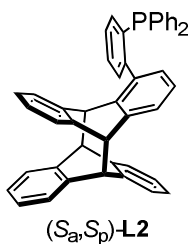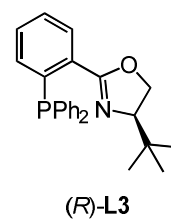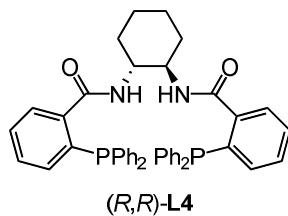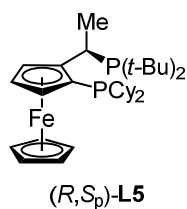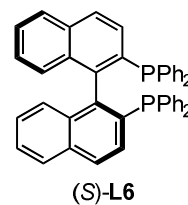

| Entry | Ligand    | Yield (%) <sup>[a]</sup> | <i>ee</i> (%) <sup>[b]</sup> |
|-------|-----------|--------------------------|------------------------------|
| 1     | <b>L1</b> | 94                       | 59                           |
| 2     | <b>L2</b> | 21                       | 39                           |
| 3     | <b>L3</b> | <2                       | -                            |
| 4     | <b>L4</b> | 2                        | 10                           |
| 5     | <b>L5</b> | <2                       | -                            |
| 6     | <b>L6</b> | <2                       | -                            |

[a] Determined by  $^1\text{H}$  NMR analysis of the crude reaction mixture using 1,3,5-trimethoxybenzene as the internal standard. [b] The *ee* values of  $(S)\text{-3aa}$  were determined by HPLC analysis on a chiral stationary phase.

## V. Substrate Scope

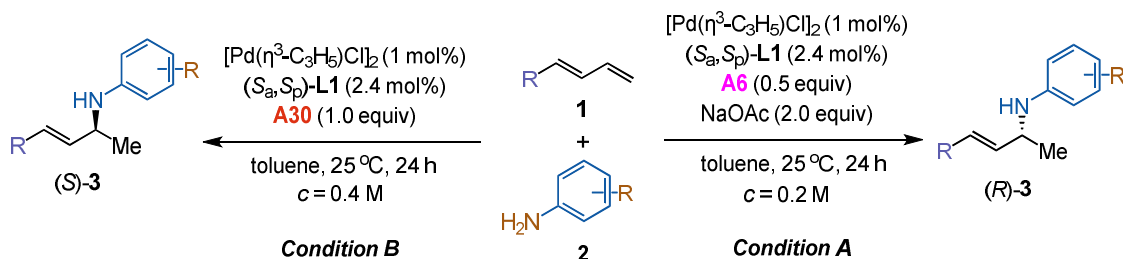

### General Procedure A (Condition A):

In a nitrogen-filled glove box, an 8-mL glass vial was charged with  $[\text{Pd}(\eta^3\text{-C}_3\text{H}_5)\text{Cl}]_2$  (3.4 mg, 0.0092 mmol) and  $(S_a, S_p)\text{-L1}$  (13.9 mg, 0.022 mmol), and the mixture was dissolved in dry toluene (2.3 mL). The solution was stirred at 25 °C for 10 min, providing a 0.008 M stock solution of Pd- $(S_a, S_p)\text{-L1}$  catalyst.

In a nitrogen-filled glove box, an 8-mL glass vial was charged with stock solution of Pd- $(S_a, S_p)\text{-L1}$  (0.50 mL, 0.008 M). **1** (0.20 mmol, 1.0 equiv) in 0.50 mL toluene was subsequently added, followed by 1-adamantanecarboxylic acid (**A6**, 18.0 mg, 0.10 mmol, 0.5 equiv), **2** (0.60 mmol, 3.0 equiv), NaOAc (32.8 mg, 0.40 mmol, 2.0 equiv). The vial was sealed with a Teflon-lined cap, transferred out of the glove box, and stirred at 25 °C for 24 h. The crude reaction mixture was analyzed by  $^1\text{H}$  NMR to determine regioisomer ratio, and was then concentrated and purified by flash silica gel chromatography to afford the desired product.

### General Procedure B (Condition B):

In a nitrogen-filled glove box, an 8-mL glass vial was charged with  $[\text{Pd}(\eta^3\text{-C}_3\text{H}_5)\text{Cl}]_2$  (3.4 mg, 0.0092 mmol) and  $(S_a, S_p)\text{-L1}$  (13.9 mg, 0.022 mmol), and the mixture was dissolved in dry toluene (0.92 mL). The solution was stirred at 25 °C for 10 min, providing a 0.02 M stock solution of Pd- $(S_a, S_p)\text{-L1}$  catalyst.

In a nitrogen-filled glove box, an 8-mL glass vial was charged with stock solution of Pd- $(S_a, S_p)\text{-L1}$  (0.20 mL, 0.02 M). **1** (0.20 mmol, 1.0 equiv) in 0.30 mL toluene was subsequently added, followed by 2-trifluoromethylphenylboronic acid (**A30**, 38.0 mg, 0.20 mmol, 1.0 equiv), **2** (0.80 mmol, 4.0 equiv). The vial was sealed with a Teflon-lined cap, transferred out of the glove box, and stirred at 25 °C for 24 h. The crude reaction mixture was analyzed by  $^1\text{H}$  NMR to determine regioisomer ratio, and was then concentrated and purified by flash silica gel chromatography to afford the desired product.

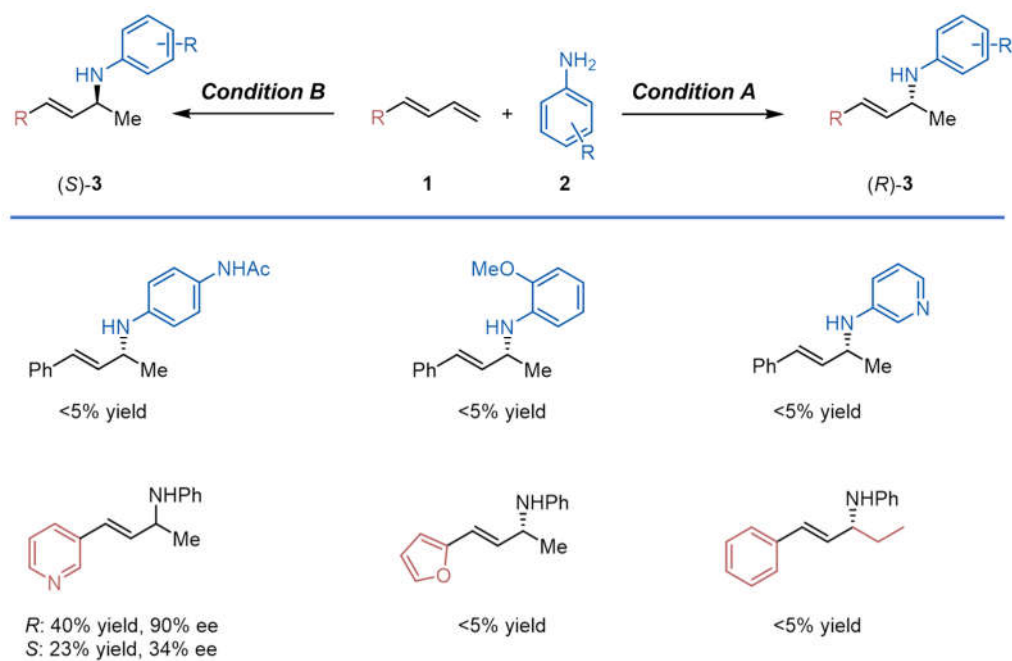

**Figure S1.** Summary of unsuccessful substrates.

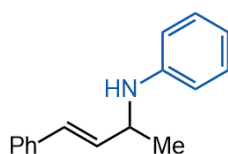

**(*E*)-*N*-(4-phenylbut-3-en-2-yl)aniline (**3aa**)**

(*R,E*)-*N*-(4-phenylbut-3-en-2-yl)aniline was prepared following the General Procedure A as yellow oil: 43.2 mg, 97% yield, 92% ee. [Daicel Chiralcel OD-H (0.46 cm × 25 cm), *n*-hexane/*i*-PrOH = 95/5,  $\nu$  = 1.0 mL/min,  $\lambda$  = 254 nm,  $t$  (minor) = 10.57 min,  $t$  (major) = 12.28 min].  $[\alpha]_{\text{D}}^{20}$  = +57.2 ( $c$  = 1.0, CH<sub>2</sub>Cl<sub>2</sub>).

(*S,E*)-*N*-(4-phenylbut-3-en-2-yl)aniline was prepared following the General Procedure B as yellow oil: 38.9 mg, 87% yield, 59% ee. [Daicel Chiralcel OD-H (0.46 cm × 25 cm), *n*-hexane/*i*-PrOH = 95/5,  $\nu$  = 1.0 mL/min,  $\lambda$  = 254 nm,  $t$  (minor) = 12.55 min,  $t$  (major) = 10.52 min].

<sup>1</sup>H NMR (400 MHz, CDCl<sub>3</sub>)  $\delta$  7.39–7.31 (m, 2H), 7.32–7.25 (m, 2H), 7.24–7.11 (m, 3H), 6.72–6.61 (m, 3H), 6.57 (d,  $J$  = 15.9 Hz, 1H), 6.21 (dd,  $J$  = 15.9, 5.8 Hz, 1H), 4.20–4.07 (m, 1H), 3.73 (br, s, 1H), 1.40 (d,  $J$  = 6.6 Hz, 3H);

Spectral data match those previously reported.<sup>[S5]</sup>

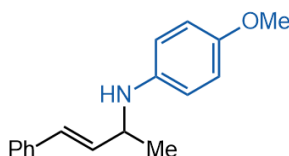

**(*E*)-4-methoxy-*N*-(4-phenylbut-3-en-2-yl)aniline (**3ab**)**

(*R,E*)-4-methoxy-*N*-(4-phenylbut-3-en-2-yl)aniline was prepared following the General Procedure A as yellow oil: 44.9 mg, 89% yield, 93% ee. [Daicel Chiralcel AD-H (0.46 cm × 25 cm), *n*-hexane/*i*-PrOH = 97/3,  $\nu$  = 1.0 mL/min,  $\lambda$  = 254 nm,  $t$  (minor) = 13.28 min,  $t$  (major) = 16.06 min].  $[\alpha]_{\text{D}}^{20}$  = +62.5 ( $c$  = 1.0, CH<sub>2</sub>Cl<sub>2</sub>).

(*S,E*)-4-methoxy-*N*-(4-phenylbut-3-en-2-yl)aniline was prepared following the General Procedure B as yellow oil: 47.9 mg, 95% yield, 57% ee. [Daicel Chiralcel AD-H (0.46 cm × 25 cm), *n*-hexane/*i*-PrOH = 97/3,  $\nu$  = 1.0 mL/min,  $\lambda$  = 254 nm,  $t$  (minor) = 15.54 min,  $t$  (major) = 12.88 min].

<sup>1</sup>H NMR (400 MHz, CDCl<sub>3</sub>)  $\delta$  7.37–7.32 (m, 2H), 7.31–7.26 (m, 2H), 7.23–7.17 (m, 1H), 6.79–6.72 (m, 2H), 6.65–6.60 (m, 2H), 6.56 (d,  $J$  = 15.9 Hz, 1H), 6.21 (dd,  $J$  = 16.0, 5.9 Hz, 1H), 4.12–4.02 (m, 1H), 3.73 (s, 3H), 1.39 (d,  $J$  = 6.6 Hz, 3H);

Spectral data match those previously reported.<sup>[S6]</sup>



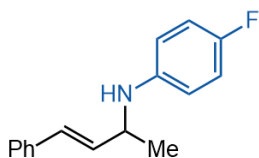

(*E*)-4-fluoro-*N*-(4-phenylbut-3-en-2-yl)aniline (**3ac**)

(*R,E*)-4-fluoro-*N*-(4-phenylbut-3-en-2-yl)aniline was prepared following the General Procedure A as yellow oil: 46.1 mg, 96% yield, 91% ee. [Daicel Chiralcel AD-H (0.46 cm × 25 cm), *n*-hexane/*i*-PrOH = 99/1,  $\nu$  = 1.0 mL/min,  $\lambda$  = 254 nm,  $t$  (minor) = 13.05 min,  $t$  (major) = 14.12 min].  $[\alpha]_{\text{D}}^{20}$  = +51.7 ( $c$  = 1.0, CH<sub>2</sub>Cl<sub>2</sub>).

(*S,E*)-4-fluoro-*N*-(4-phenylbut-3-en-2-yl)aniline was prepared following the General Procedure B as yellow oil: 44.9 mg, 93% yield, 58% ee. [Daicel Chiralcel AD-H (0.46 cm × 25 cm), *n*-hexane/*i*-PrOH = 99/1,  $\nu$  = 1.0 mL/min,  $\lambda$  = 254 nm,  $t$  (minor) = 13.81 min,  $t$  (major) = 12.75 min].

<sup>1</sup>H NMR (400 MHz, CDCl<sub>3</sub>)  $\delta$  7.38–7.32 (m, 2H), 7.32–7.26 (m, 2H), 7.24–7.18 (m, 1H), 6.92–6.81 (m, 2H), 6.63–6.50 (m, 3H), 6.18 (dd,  $J$  = 16.0, 5.9 Hz, 1H), 4.13–4.01 (m, 1H), 3.60 (br, s, 1H), 1.39 (d,  $J$  = 6.6 Hz, 3H);

<sup>13</sup>C NMR (101 MHz, CDCl<sub>3</sub>)  $\delta$  155.8 (d,  $J$  = 235.0 Hz), 143.7 (d,  $J$  = 1.9 Hz), 136.9, 133.0, 129.5, 128.5, 127.4, 126.3, 115.6 (d,  $J$  = 22.2 Hz), 114.3 (d,  $J$  = 7.4 Hz), 51.6, 22.1;

<sup>19</sup>F NMR (377 MHz, CDCl<sub>3</sub>)  $\delta$  -128.1;

IR (neat):  $\nu_{\text{max}}$  (cm<sup>-1</sup>) = 3412, 3028, 2967, 2923, 2859, 1608, 1501, 1306, 1205;

HRMS (ESI) calcd for C<sub>16</sub>H<sub>17</sub>NF [M+H]<sup>+</sup>: 242.1340. Found: 242.1346.

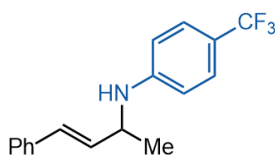

(*E*)-*N*-(4-phenylbut-3-en-2-yl)-4-(trifluoromethyl)aniline (**3ad**)

(*R,E*)-*N*-(4-phenylbut-3-en-2-yl)-4-(trifluoromethyl)aniline was prepared following the General Procedure A as yellow oil: 56.2 mg, 96% yield, 79% ee. [Daicel Chiralcel OD-H (0.46 cm × 25 cm), *n*-hexane/*i*-PrOH = 95/5,  $\nu$  = 1.0 mL/min,  $\lambda$  = 254 nm,  $t$  (minor) = 14.91 min,  $t$  (major) = 10.71 min].  $[\alpha]_{\text{D}}^{20}$  = +53.6 ( $c$  = 1.0, CH<sub>2</sub>Cl<sub>2</sub>).

(*S,E*)-*N*-(4-phenylbut-3-en-2-yl)-4-(trifluoromethyl)aniline was prepared following the General Procedure B as yellow oil: 5.2 mg, 9% yield, 45% ee. [Daicel Chiralcel OD-H (0.46 cm × 25 cm), *n*-hexane/*i*-PrOH = 95/5,  $v = 1.0$  mL/min,  $\lambda = 254$  nm,  $t$  (minor) = 9.99 min,  $t$  (major) = 13.73 min].

Note: The low yield of (*S*)-**3ad** was due to incomplete conversion.

$^1\text{H}$  NMR (400 MHz,  $\text{CDCl}_3$ )  $\delta$  7.41–7.32 (m, 4H), 7.32–7.27 (m, 2H), 7.25–7.19 (m, 1H), 6.63 (d,  $J = 8.4$  Hz, 2H), 6.55 (d,  $J = 16.0$  Hz, 1H), 6.17 (dd,  $J = 15.9, 5.8$  Hz, 1H), 4.23–4.12 (m, 1H), 4.07 (br, s, 1H), 1.42 (d,  $J = 6.5$  Hz, 3H);

Spectral data match those previously reported.<sup>[S5]</sup>

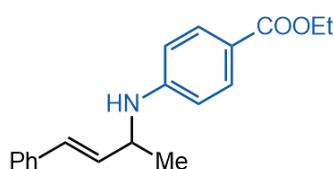

ethyl (*E*)-4-((4-phenylbut-3-en-2-yl)amino)benzoate (**3ae**)

ethyl (*R,E*)-4-((4-phenylbut-3-en-2-yl)amino)benzoate was prepared following the General Procedure A as colorless oil: 56.5 mg, 96% yield, 81% ee. [Daicel Chiralcel AD-H (0.46 cm × 25 cm), *n*-hexane/*i*-PrOH = 90/10,  $v = 1.0$  mL/min,  $\lambda = 254$  nm,  $t$  (minor) = 15.74 min,  $t$  (major) = 28.01 min].  $[\alpha]_{\text{D}}^{20} = +98.1$  ( $c = 1.0$ ,  $\text{CH}_2\text{Cl}_2$ ).

ethyl (*S,E*)-4-((4-phenylbut-3-en-2-yl)amino)benzoate was prepared following the General Procedure B as colorless oil: 14.6 mg, 25% yield, 57% ee. [Daicel Chiralcel AD-H (0.46 cm × 25 cm), *n*-hexane/*i*-PrOH = 90/10,  $v = 1.0$  mL/min,  $\lambda = 254$  nm,  $t$  (minor) = 27.54 min,  $t$  (major) = 15.44 min].

Note: The low yield of (*S*)-**3ae** was due to incomplete conversion.

$^1\text{H}$  NMR (400 MHz,  $\text{CDCl}_3$ )  $\delta$  7.89–7.82 (m, 2H), 7.36–7.31 (m, 2H), 7.31–7.26 (m, 2H), 7.24–7.19 (m, 1H), 6.63–6.51 (m, 3H), 6.17 (dd,  $J = 15.9, 5.7$  Hz, 1H), 4.36–4.10 (m, 4H), 1.43 (d,  $J = 6.6$  Hz, 3H), 1.34 (t,  $J = 7.1$  Hz, 3H).

$^{13}\text{C}$  NMR (101 MHz,  $\text{CDCl}_3$ )  $\delta$  166.8, 151.0, 136.6, 131.9, 131.4, 129.8, 128.5, 127.5, 126.3, 118.8, 112.1, 60.1, 50.4, 21.8, 14.4;

IR (neat):  $\nu_{\text{max}}$  ( $\text{cm}^{-1}$ ) = 3366, 3028, 2975, 2927, 1689, 1600, 1520, 1264, 1165, 1104;

HRMS (ESI) calcd for  $\text{C}_{19}\text{H}_{22}\text{NO}_2$   $[\text{M}+\text{H}]^+$ : 296.1645. Found: 296.1652.

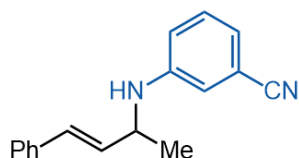

(*E*)-3-((4-phenylbut-3-en-2-yl)amino)benzonitrile (**3af**)

(*R,E*)-3-((4-phenylbut-3-en-2-yl)amino)benzonitrile was prepared following the General Procedure A as bright yellow oil: 42.9 mg, 86% yield, 84% ee. [Daicel Chiralcel AD-H (0.46 cm × 25 cm), *n*-hexane/*i*-PrOH = 90/10,  $\nu$  = 1.0 mL/min,  $\lambda$  = 254 nm,  $t$  (minor) = 14.45 min,  $t$  (major) = 16.99 min].  $[\alpha]_{\text{D}}^{20}$  = +59.6 ( $c$  = 1.0, CH<sub>2</sub>Cl<sub>2</sub>).

(*S,E*)-3-((4-phenylbut-3-en-2-yl)amino)benzonitrile was prepared following the General Procedure B as bright yellow oil: 3.5 mg, 7% yield, 58% ee. [Daicel Chiralcel AD-H (0.46 cm × 25 cm), *n*-hexane/*i*-PrOH = 90/10,  $\nu$  = 1.0 mL/min,  $\lambda$  = 254 nm,  $t$  (minor) = 16.48 min,  $t$  (major) = 14.13 min].

Note: The low yield of (*S*)-**3af** was due to incomplete conversion.

<sup>1</sup>H NMR (400 MHz, CDCl<sub>3</sub>)  $\delta$  7.39–7.27 (m, 4H), 7.25–7.16 (m, 2H), 6.95–6.90 (m, 1H), 6.87–6.76 (m, 2H), 6.55 (d,  $J$  = 16.0 Hz, 1H), 6.14 (dd,  $J$  = 15.9, 5.9 Hz, 1H), 4.17–4.06 (m, 1H), 3.98 (s, 1H), 1.42 (d,  $J$  = 6.6 Hz, 3H);

<sup>13</sup>C NMR (101 MHz, CDCl<sub>3</sub>)  $\delta$  147.5, 136.5, 131.7, 129.9, 129.8, 128.6, 127.6, 126.3, 120.7, 119.5, 117.6, 115.6, 112.8, 50.7, 21.9;

IR (neat):  $\nu_{\text{max}}$  (cm<sup>-1</sup>) = 3381, 3028, 2971, 2927, 2870, 1598, 1484, 1332, 964;

HRMS (ESI) calcd for C<sub>17</sub>H<sub>16</sub>N<sub>2</sub>Na [M+Na]<sup>+</sup>: 271.1206. Found: 271.1211.

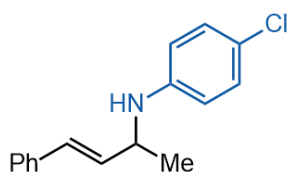

(*E*)-4-chloro-*N*-(4-phenylbut-3-en-2-yl)aniline (**3ag**)

(*R,E*)-4-chloro-*N*-(4-phenylbut-3-en-2-yl)aniline was prepared following the General Procedure A as yellow oil: 50.7 mg, 98% yield, 83% ee. [Daicel Chiralcel OD-H (0.46 cm × 25 cm), *n*-hexane/*i*-PrOH = 90/10,  $\nu$  = 1.0 mL/min,  $\lambda$  = 254 nm,  $t$  (minor) = 10.61 min,  $t$  (major) = 8.67 min].  $[\alpha]_{\text{D}}^{20}$  = +66.2 ( $c$  = 1.0, CH<sub>2</sub>Cl<sub>2</sub>).

(*S,E*)-4-chloro-*N*-(4-phenylbut-3-en-2-yl)aniline was prepared following the General Procedure B as yellow oil: 49.9 mg, 97% yield, 57% ee. [Daicel Chiralcel OD-H (0.46 cm × 25 cm), *n*-hexane/*i*-PrOH = 90/10,  $\nu$  = 1.0 mL/min,  $\lambda$  = 254 nm, *t* (minor) = 8.56 min, *t* (major) = 10.25 min].

<sup>1</sup>H NMR (400 MHz, CDCl<sub>3</sub>)  $\delta$  7.38–7.32 (m, 2H), 7.32–7.26 (m, 2H), 7.24–7.19 (m, 1H), 7.13–7.05 (m, 2H), 6.62–6.48 (m, 3H), 6.17 (dd, *J* = 15.9, 5.8 Hz, 1H), 4.15–4.03 (m, 1H), 3.74 (br, s, 1H), 1.39 (d, *J* = 6.6 Hz, 3H);

Spectral data match those previously reported.<sup>[S7]</sup>

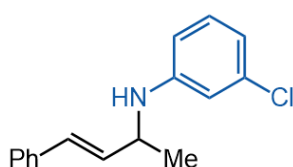

(*E*)-3-chloro-*N*-(4-phenylbut-3-en-2-yl)aniline (**3ah**)

(*R,E*)-3-chloro-*N*-(4-phenylbut-3-en-2-yl)aniline was prepared following the General Procedure A as yellow oil: 48.2 mg, 93% yield, 83% ee. [Daicel Chiralcel AD-H (0.46 cm × 25 cm), *n*-hexane/*i*-PrOH = 97/3,  $\nu$  = 1.0 mL/min,  $\lambda$  = 254 nm, *t* (minor) = 8.96 min, *t* (major) = 10.95 min]. [ $\alpha$ ]<sub>D</sub><sup>20</sup> = +56.9 (*c* = 1.0, CH<sub>2</sub>Cl<sub>2</sub>).

(*S,E*)-3-chloro-*N*-(4-phenylbut-3-en-2-yl)aniline was prepared following the General Procedure B as yellow oil: 48.9 mg, 95% yield, 60% ee. [Daicel Chiralcel AD-H (0.46 cm × 25 cm), *n*-hexane/*i*-PrOH = 97/3,  $\nu$  = 1.0 mL/min,  $\lambda$  = 254 nm, *t* (minor) = 10.75 min, *t* (major) = 8.85 min].

<sup>1</sup>H NMR (400 MHz, CDCl<sub>3</sub>)  $\delta$  7.39–7.33 (m, 2H), 7.32–7.27 (m, 2H), 7.24–7.19 (m, 1H), 7.05 (dd, *J* = 8.0, 8.0 Hz, 1H), 6.67–6.60 (m, 2H), 6.56 (d, *J* = 16.0 Hz, 1H), 6.50 (dd, *J* = 8.2, 2.3 Hz, 1H), 6.17 (dd, *J* = 16.0, 5.8 Hz, 1H), 4.18–4.06 (m, 1H), 3.82 (br, s, 1H), 1.40 (d, *J* = 6.6 Hz, 3H);

<sup>13</sup>C NMR (101 MHz, CDCl<sub>3</sub>)  $\delta$  148.4, 136.8, 134.9, 132.4, 130.1, 129.6, 128.5, 127.5, 126.3, 117.2, 113.0, 111.6, 50.7, 22.0;

IR (neat):  $\nu_{\text{max}}$  (cm<sup>-1</sup>) = 3415, 3028, 2969, 2923, 2863, 1596, 1492, 1321, 1165, 1078;

HRMS (ESI) calcd for C<sub>16</sub>H<sub>17</sub>NCl [M+H]<sup>+</sup>: 258.1044. Found: 258.1054.

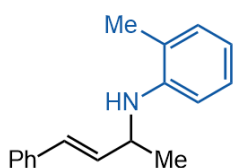

(*E*)-2-methyl-*N*-(4-phenylbut-3-en-2-yl)aniline (**3ai**)

(*R,E*)-2-methyl-*N*-(4-phenylbut-3-en-2-yl)aniline was prepared following the General Procedure A as yellow oil: 42.6 mg, 90% yield, 85% ee. [Daicel Chiralcel OD-H (0.46 cm × 25 cm), *n*-hexane/*i*-PrOH = 95/5,  $\nu$  = 1.0 mL/min,  $\lambda$  = 254 nm,  $t$  (minor) = 7.79 min,  $t$  (major) = 14.76 min].  $[\alpha]_{\text{D}}^{20}$  = +23.0 ( $c$  = 1.0, CH<sub>2</sub>Cl<sub>2</sub>).

(*S,E*)-2-methyl-*N*-(4-phenylbut-3-en-2-yl)aniline was prepared following the General Procedure B as yellow oil: 45.7 mg, 96% yield, 57% ee. [Daicel Chiralcel OD-H (0.46 cm × 25 cm), *n*-hexane/*i*-PrOH = 95/5,  $\nu$  = 1.0 mL/min,  $\lambda$  = 254 nm,  $t$  (minor) = 14.87 min,  $t$  (major) = 7.68 min].

<sup>1</sup>H NMR (400 MHz, CDCl<sub>3</sub>)  $\delta$  7.39–7.33 (m, 2H), 7.31–7.26 (m, 2H), 7.22–7.17 (m, 1H), 7.12–7.02 (m, 2H), 6.70–6.61 (m, 2H), 6.57 (d,  $J$  = 16.0 Hz, 1H), 6.24 (dd,  $J$  = 16.0, 5.8 Hz, 1H), 4.24–4.14 (m, 1H), 3.55 (br, s, 1H), 2.18 (s, 3H), 1.44 (d,  $J$  = 6.6 Hz, 3H);

Spectral data match those previously reported.<sup>[S5]</sup>

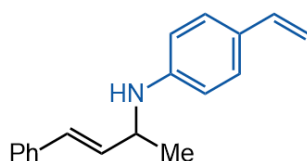

(*E*)-*N*-(4-phenylbut-3-en-2-yl)-4-vinylaniline (**3aj**)

(*R,E*)-*N*-(4-phenylbut-3-en-2-yl)-4-vinylaniline was prepared following the General Procedure A as yellow oil: 49.0 mg, 98% yield, 91% ee. [Daicel Chiralcel AD-H (0.46 cm × 25 cm), *n*-hexane/*i*-PrOH = 97/3,  $\nu$  = 1.0 mL/min,  $\lambda$  = 254 nm,  $t$  (minor) = 10.24 min,  $t$  (major) = 11.84 min].  $[\alpha]_{\text{D}}^{20}$  = +77.9 ( $c$  = 1.0, CH<sub>2</sub>Cl<sub>2</sub>).

(*S,E*)-*N*-(4-phenylbut-3-en-2-yl)-4-vinylaniline was prepared following the General Procedure B as yellow oil: 8.3 mg, 17% yield, 56% ee. [Daicel Chiralcel AD-H (0.46 cm × 25 cm), *n*-hexane/*i*-PrOH = 97/3,  $\nu$  = 1.0 mL/min,  $\lambda$  = 254 nm,  $t$  (minor) = 12.04 min,  $t$  (major) = 10.36 min].

Note: The low yield of (*S*)-**3aj** was due to incomplete conversion.

<sup>1</sup>H NMR (400 MHz, CDCl<sub>3</sub>)  $\delta$  7.38–7.31 (m, 2H), 7.31–7.25 (m, 2H), 7.25–7.17 (m, 3H), 6.64–6.52 (m, 4H), 6.19 (dd,  $J$  = 16.0, 5.8 Hz, 1H), 5.50 (d,  $J$  = 17.6 Hz, 1H), 4.99 (d,  $J$  = 10.9 Hz, 1H), 4.20–4.10 (m, 1H), 3.77 (br, s, 1H), 1.40 (d,  $J$  = 6.6 Hz, 3H);

<sup>13</sup>C NMR (101 MHz, CDCl<sub>3</sub>)  $\delta$  147.1, 136.9, 136.6, 132.9, 129.4, 128.5, 127.4, 127.3, 127.2, 126.3, 113.3, 109.4, 50.8, 22.0;

IR (neat):  $\nu_{\text{max}}$  (cm<sup>-1</sup>) = 3404, 3026, 2965, 2923, 2865, 1611, 1513, 1317, 1175;

HRMS (ESI) calcd for C<sub>18</sub>H<sub>20</sub>N [M+H]<sup>+</sup>: 250.1590. Found: 250.1596.

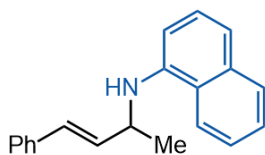

(*E*)-*N*-(4-phenylbut-3-en-2-yl)naphthalen-1-amine (**3ak**)

(*R,E*)-*N*-(4-phenylbut-3-en-2-yl)naphthalen-1-amine was prepared following the General Procedure A as red oil: 52.9 mg, 97% yield, 80% ee. [Daicel Chiralcel OD-H (0.46 cm × 25 cm), *n*-hexane/*i*-PrOH = 95/5,  $\nu$  = 1.0 mL/min,  $\lambda$  = 254 nm, t (minor) = 18.94 min, t (major) = 27.20 min]. [ $\alpha$ ]<sub>D</sub><sup>20</sup> = -85.6 (*c* = 1.0, CH<sub>2</sub>Cl<sub>2</sub>).

(*S,E*)-*N*-(4-phenylbut-3-en-2-yl)naphthalen-1-amine was prepared following the General Procedure B as red oil: 46.7 mg, 85% yield, 66% ee. [Daicel Chiralcel OD-H (0.46 cm × 25 cm), *n*-hexane/*i*-PrOH = 95/5,  $\nu$  = 1.0 mL/min,  $\lambda$  = 254 nm, t (minor) = 27.60 min, t (major) = 18.28 min].

<sup>1</sup>H NMR (400 MHz, CDCl<sub>3</sub>)  $\delta$  7.90–7.82 (m, 1H), 7.82–7.76 (m, 1H), 7.49–7.40 (m, 2H), 7.38–7.33 (m, 2H), 7.33–7.25 (m, 3H), 7.24–7.17 (m, 2H), 6.67 (d, *J* = 7.6 Hz, 1H), 6.63 (d, *J* = 16.0 Hz, 1H), 6.30 (dd, *J* = 16.0, 5.7 Hz, 1H), 4.40 (br, s, 1H), 4.37–4.28 (m, 1H), 1.54 (d, *J* = 6.6 Hz, 3H);

<sup>13</sup>C NMR (101 MHz, CDCl<sub>3</sub>)  $\delta$  142.3, 136.9, 134.4, 132.9, 129.5, 128.7, 128.5, 127.4, 126.6, 126.3, 125.6, 124.6, 123.3, 119.8, 117.3, 105.7, 50.9, 22.2;

IR (neat):  $\nu_{\text{max}}$  (cm<sup>-1</sup>) = 3430, 3058, 3026, 2969, 2925, 2863, 1581, 1520, 1399;

HRMS (ESI) calcd for C<sub>20</sub>H<sub>20</sub>N [M+H]<sup>+</sup>: 274.1590. Found: 274.1596.

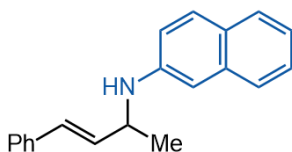

(*E*)-*N*-(4-phenylbut-3-en-2-yl)naphthalen-2-amine (**3al**)

(*R,E*)-*N*-(4-phenylbut-3-en-2-yl)naphthalen-2-amine was prepared following the General Procedure A as a red solid: 54.0 mg, 99% yield, 88% ee. [Daicel Chiralcel AD-H (0.46 cm × 25 cm), *n*-hexane/*i*-PrOH = 95/5,  $\nu$  = 1.0 mL/min,  $\lambda$  = 254 nm, t (minor) = 10.18 min, t (major) = 11.31 min]. [ $\alpha$ ]<sub>D</sub><sup>20</sup> = +159.9 (*c* = 1.0, CH<sub>2</sub>Cl<sub>2</sub>).

(*S,E*)-*N*-(4-phenylbut-3-en-2-yl)naphthalen-2-amine was prepared following the General Procedure B as a red solid: 49.8 mg, 91% yield, 58% ee. [Daicel Chiralcel AD-H (0.46 cm × 25 cm), *n*-hexane/*i*-PrOH = 95/5,  $\nu$  =

1.0 mL/min,  $\lambda = 254$  nm,  $t$  (minor) = 11.41 min,  $t$  (major) = 10.24 min].

$^1\text{H}$  NMR (400 MHz,  $\text{CDCl}_3$ )  $\delta$  7.64 (dd,  $J = 11.7, 8.4$  Hz, 2H), 7.58 (d,  $J = 8.2$  Hz, 1H), 7.38–7.25 (m, 5H), 7.22–7.14 (m, 2H), 6.91 (dd,  $J = 8.7, 2.4$  Hz, 1H), 6.86 (d,  $J = 2.3$  Hz, 1H), 6.62 (d,  $J = 16.0$  Hz, 1H), 6.27 (dd,  $J = 16.0, 5.6$  Hz, 1H), 4.34–4.22 (m, 1H), 3.90 (br, s, 1H), 1.46 (d,  $J = 6.6$  Hz, 3H);

$^{13}\text{C}$  NMR (101 MHz,  $\text{CDCl}_3$ )  $\delta$  144.9, 136.9, 135.1, 132.8, 129.4, 128.9, 128.5, 127.6, 127.5, 127.4, 126.3, 126.2, 126.0, 121.9, 118.1, 105.6, 50.8, 21.9;

IR (thin film):  $\nu_{\text{max}}$  ( $\text{cm}^{-1}$ ) = 3427, 3056, 3015, 2963, 2920, 2859, 1627, 1515, 1357;

HRMS (ESI) calcd for  $\text{C}_{20}\text{H}_{20}\text{N}$   $[\text{M}+\text{H}]^+$ : 274.1590. Found: 274.1598.

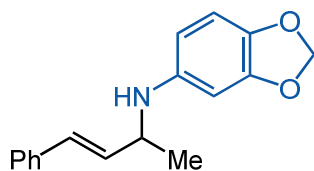

(*E*)-*N*-(4-phenylbut-3-en-2-yl)benzo[d][1,3]dioxol-5-amine (**3am**)

(*R,E*)-*N*-(4-phenylbut-3-en-2-yl)benzo[d][1,3]dioxol-5-amine was prepared following the General Procedure A as a yellow solid: 46.2 mg, 86% yield, 93% ee. [Daicel Chiralcel AD-H (0.46 cm  $\times$  25 cm), *n*-hexane/*i*-PrOH = 90/10,  $\nu = 1.0$  mL/min,  $\lambda = 254$  nm,  $t$  (minor) = 11.68 min,  $t$  (major) = 15.61 min].  $[\alpha]_{\text{D}}^{20} = +70.2$  ( $c = 1.0$ ,  $\text{CH}_2\text{Cl}_2$ ).

(*S,E*)-*N*-(4-phenylbut-3-en-2-yl)benzo[d][1,3]dioxol-5-amine was prepared following the General Procedure B as a yellow solid: 36.7 mg, 69% yield, 58% ee. [Daicel Chiralcel AD-H (0.46 cm  $\times$  25 cm), *n*-hexane/*i*-PrOH = 90/10,  $\nu = 1.0$  mL/min,  $\lambda = 254$  nm,  $t$  (minor) = 14.32 min,  $t$  (major) = 11.06 min].

$^1\text{H}$  NMR (400 MHz,  $\text{CDCl}_3$ )  $\delta$  7.38–7.32 (m, 2H), 7.31–7.25 (m, 2H), 7.23–7.17 (m, 1H), 6.63 (d,  $J = 8.3$  Hz, 1H), 6.55 (d,  $J = 16.0$  Hz, 1H), 6.28 (d,  $J = 2.3$  Hz, 1H), 6.18 (dd,  $J = 16.0, 5.9$  Hz, 1H), 6.08 (dd,  $J = 8.3, 2.3$  Hz, 1H), 5.82 (s, 2H), 4.08–3.98 (m, 1H), 3.45 (br, s, 1H), 1.37 (d,  $J = 6.6$  Hz, 3H);

$^{13}\text{C}$  NMR (101 MHz,  $\text{CDCl}_3$ )  $\delta$  148.2, 143.1, 139.6, 136.9, 133.3, 129.3, 128.5, 127.3, 126.3, 108.6, 105.4, 100.5, 96.6, 51.9, 22.1;

IR (thin film):  $\nu_{\text{max}}$  ( $\text{cm}^{-1}$ ) = 3419, 2975, 2958, 2920, 2857, 1636, 1488, 1209, 1032;

HRMS (ESI) calcd for  $\text{C}_{17}\text{H}_{18}\text{NO}_2$   $[\text{M}+\text{H}]^+$ : 268.1332. Found: 268.1337.

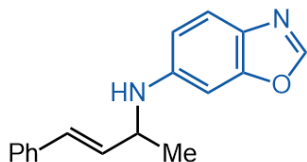

(*E*)-*N*-(4-phenylbut-3-en-2-yl)benzo[d]oxazol-6-amine (**3an**)

(*R,E*)-*N*-(4-phenylbut-3-en-2-yl)benzo[d]oxazol-6-amine was prepared following the General Procedure A as a yellow solid: 44.9 mg, 85% yield, 91% ee. [Daicel Chiralcel AD-H (0.46 cm × 25 cm), *n*-hexane/*i*-PrOH = 80/20,  $\nu$  = 1.0 mL/min,  $\lambda$  = 254 nm, *t* (minor) = 9.71 min, *t* (major) = 21.00 min].  $[\alpha]_{\text{D}}^{20}$  = +82.1 (*c* = 1.0, CH<sub>2</sub>Cl<sub>2</sub>).

(*S,E*)-*N*-(4-phenylbut-3-en-2-yl)benzo[d]oxazol-6-amine was prepared following the General Procedure B as a yellow solid: 18.9 mg, 36% yield, 48% ee. [Daicel Chiralcel AD-H (0.46 cm × 25 cm), *n*-hexane/*i*-PrOH = 80/20,  $\nu$  = 1.0 mL/min,  $\lambda$  = 254 nm, *t* (minor) = 21.44 min, *t* (major) = 9.70 min].

<sup>1</sup>H NMR (400 MHz, CDCl<sub>3</sub>)  $\delta$  7.85 (s, 1H), 7.51 (d, *J* = 8.6 Hz, 1H), 7.38–7.33 (m, 2H), 7.32–7.26 (m, 2H), 7.24–7.18 (m, 1H), 6.79 (d, *J* = 2.2 Hz, 1H), 6.68 (dd, *J* = 8.6, 2.2 Hz, 1H), 6.60 (d, *J* = 16.0 Hz, 1H), 6.21 (dd, *J* = 16.0, 5.9 Hz, 1H), 4.20–4.09 (m, 1H), 3.99 (br, s, 1H), 1.44 (d, *J* = 6.6 Hz, 3H);

<sup>13</sup>C NMR (101 MHz, CDCl<sub>3</sub>)  $\delta$  151.7, 150.2, 146.4, 136.7, 132.5, 131.4, 129.7, 128.5, 127.5, 126.3, 120.4, 112.6, 94.1, 51.4, 22.0;

IR (thin film):  $\nu_{\text{max}}$  (cm<sup>-1</sup>) = 3341, 3113, 3024, 2963, 2923, 2842, 1625, 1488, 1201, 1070;

HRMS (ESI) calcd for C<sub>17</sub>H<sub>17</sub>N<sub>2</sub>O [M+H]<sup>+</sup>: 265.1335. Found: 265.1340.

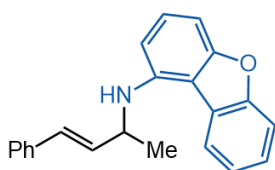

(*E*)-*N*-(4-phenylbut-3-en-2-yl)dibenzo[b,d]furan-1-amine (**3ao**)

(*R,E*)-*N*-(4-phenylbut-3-en-2-yl)dibenzo[b,d]furan-1-amine was prepared following the General Procedure A as a yellow solid: 62.0 mg, 99% yield, 78% ee. [Daicel Chiralcel OD-H (0.46 cm × 25 cm), *n*-hexane/*i*-PrOH = 95/5,  $\nu$  = 1.0 mL/min,  $\lambda$  = 254 nm, *t* (minor) = 12.17 min, *t* (major) = 13.99 min].  $[\alpha]_{\text{D}}^{20}$  = -153.9 (*c* = 1.0, CH<sub>2</sub>Cl<sub>2</sub>).



(*S,E*)-*N*-(4-phenylbut-3-en-2-yl)dibenzo[*b,d*]furan-1-amine was prepared following the General Procedure B as a yellow solid: 23.2 mg, 37% yield, 58% ee. [Daicel Chiralcel OD-H (0.46 cm × 25 cm), *n*-hexane/*i*-PrOH = 95/5,  $\nu$  = 1.0 mL/min,  $\lambda$  = 254 nm, *t* (minor) = 14.34 min, *t* (major) = 12.20 min].

<sup>1</sup>H NMR (400 MHz, CDCl<sub>3</sub>)  $\delta$  7.82 (d, *J* = 7.6 Hz, 1H), 7.56 (d, *J* = 7.8 Hz, 1H), 7.43–7.32 (m, 4H), 7.31–7.25 (m, 3H), 7.23–7.18 (m, 1H), 6.96 (d, *J* = 8.1 Hz, 1H), 6.66 (d, *J* = 15.9 Hz, 1H), 6.61 (d, *J* = 8.1 Hz, 1H), 6.32 (dd, *J* = 16.0, 5.7 Hz, 1H), 4.48–4.33 (m, 2H), 1.57 (d, *J* = 6.5 Hz, 3H);

<sup>13</sup>C NMR (101 MHz, CDCl<sub>3</sub>)  $\delta$  157.2, 155.3, 143.7, 136.8, 132.6, 129.7, 128.5, 128.4, 127.5, 126.4, 125.4, 124.0, 122.5, 120.1, 111.3, 110.3, 105.1, 100.8, 50.9, 22.3;

IR (thin film):  $\nu_{\max}$  (cm<sup>-1</sup>) = 3436, 3026, 2963, 2925, 2861, 1596, 1501, 1237, 1175, 1061;

HRMS (ESI) calcd for C<sub>22</sub>H<sub>20</sub>NO [M+H]<sup>+</sup>: 314.1539. Found: 314.1544.

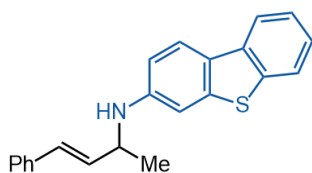

(*E*)-*N*-(4-phenylbut-3-en-2-yl)dibenzo[*b,d*]thiophen-3-amine (**3ap**)

(*R,E*)-*N*-(4-phenylbut-3-en-2-yl)dibenzo[*b,d*]thiophen-3-amine was prepared following the General Procedure A as yellow oil: 61.4 mg, 93% yield, 82% ee. [Daicel Chiralcel AD-H (0.46 cm × 25 cm), *n*-hexane/*i*-PrOH = 95/5,  $\nu$  = 1.0 mL/min,  $\lambda$  = 254 nm, *t* (minor) = 15.71 min, *t* (major) = 18.10 min]. [ $\alpha$ ]<sub>D</sub><sup>20</sup> = +119.9 (*c* = 1.0, CH<sub>2</sub>Cl<sub>2</sub>).

(*S,E*)-*N*-(4-phenylbut-3-en-2-yl)dibenzo[*b,d*]thiophen-3-amine was prepared following the General Procedure B as yellow oil: 64.6 mg, 98% yield, 18% ee. [Daicel Chiralcel AD-H (0.46 cm × 25 cm), *n*-hexane/*i*-PrOH = 95/5,  $\nu$  = 1.0 mL/min,  $\lambda$  = 254 nm, *t* (minor) = 18.36 min, *t* (major) = 15.90 min].

<sup>1</sup>H NMR (400 MHz, CDCl<sub>3</sub>)  $\delta$  7.92 (d, *J* = 8.1 Hz, 1H), 7.87 (d, *J* = 8.5 Hz, 1H), 7.72 (d, *J* = 7.7 Hz, 1H), 7.38–7.31 (m, 3H), 7.31–7.24 (m, 3H), 7.21–7.16 (m, 1H), 7.00 (d, *J* = 2.2 Hz, 1H), 6.75 (dd, *J* = 8.6, 2.2 Hz, 1H), 6.59 (dd, *J* = 16.0 Hz, 1H), 6.22 (dd, *J* = 16.0, 5.6 Hz, 1H), 4.27–4.14 (m, 1H), 3.93 (br, s, 1H), 1.42 (d, *J* = 6.6 Hz, 3H);

<sup>13</sup>C NMR (101 MHz, CDCl<sub>3</sub>)  $\delta$  146.8, 141.5, 137.9, 136.8, 136.1, 132.6, 129.5, 128.5, 127.4, 126.4, 126.3, 124.7, 124.2, 122.5, 122.1, 120.0, 112.6, 104.9, 51.0, 22.0;

IR (neat):  $\nu_{\max}$  (cm<sup>-1</sup>) = 3411, 3062, 3024, 2969, 2920, 1602, 1494, 1452;

HRMS (ESI) calcd for C<sub>22</sub>H<sub>20</sub>NS [M+H]<sup>+</sup>: 330.1311. Found: 330.1315.

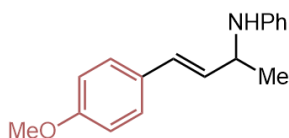

(*E*)-*N*-(4-(4-methoxyphenyl)but-3-en-2-yl)aniline (**3ba**)

(*R,E*)-*N*-(4-(4-methoxyphenyl)but-3-en-2-yl)aniline was prepared following the General Procedure A as a white solid: 49.1 mg, 97% yield, 84% ee. [Daicel Chiralcel OD-H (0.46 cm × 25 cm), *n*-hexane/*i*-PrOH = 90/10,  $\nu$  = 1.0 mL/min,  $\lambda$  = 254 nm, *t* (minor) = 9.45 min, *t* (major) = 12.39 min]. [ $\alpha$ ]<sub>D</sub><sup>20</sup> = +60.0 (*c* = 1.0, CH<sub>2</sub>Cl<sub>2</sub>).

(*S,E*)-*N*-(4-(4-methoxyphenyl)but-3-en-2-yl)aniline was prepared following the General Procedure B as a white solid: 47.3 mg, 93% yield, 40% ee. [Daicel Chiralcel OD-H (0.46 cm × 25 cm), *n*-hexane/*i*-PrOH = 90/10,  $\nu$  = 1.0 mL/min,  $\lambda$  = 254 nm, *t* (minor) = 12.51 min, *t* (major) = 9.24 min].

<sup>1</sup>H NMR (400 MHz, CDCl<sub>3</sub>)  $\delta$  7.28 (d, *J* = 8.7 Hz, 2H), 7.19–7.09 (m, 2H), 6.87–6.79 (m, 2H), 6.73–6.59 (m, 3H), 6.51 (d, *J* = 16.1 Hz, 1H), 6.06 (dd, *J* = 15.9, 5.9 Hz, 1H), 4.16–4.06 (m, 1H), 3.78 (s, 3H), 3.68 (br, s, 1H), 1.38 (d, *J* = 6.6 Hz, 3H);

<sup>13</sup>C NMR (101 MHz, CDCl<sub>3</sub>)  $\delta$  159.0, 147.5, 131.0, 129.8, 129.1, 128.7, 127.4, 117.2, 113.9, 113.4, 55.3, 50.8, 22.1;

IR (thin film):  $\nu_{\max}$  (cm<sup>-1</sup>) = 3366, 3051, 3022, 2963, 2920, 1600, 1507, 1494, 1251, 1019;

HRMS (ESI) calcd for C<sub>17</sub>H<sub>19</sub>NONa [M+Na]<sup>+</sup>: 276.1359. Found: 276.1365.

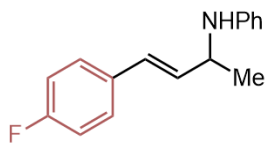

(*E*)-*N*-(4-(4-fluorophenyl)but-3-en-2-yl)aniline (**3ca**)

(*R,E*)-*N*-(4-(4-fluorophenyl)but-3-en-2-yl)aniline was prepared following the General Procedure A as colorless oil: 44.3 mg, 92% yield, 92% ee. [Daicel Chiralcel OD-H (0.46 cm × 25 cm), *n*-hexane/*i*-PrOH = 95/5,  $\nu$  = 1.0 mL/min,  $\lambda$  = 254 nm, *t* (minor) = 9.93 min, *t* (major) = 12.59 min]. [ $\alpha$ ]<sub>D</sub><sup>20</sup> = +55.5 (*c* = 1.0, CH<sub>2</sub>Cl<sub>2</sub>).

(*S,E*)-*N*-(4-(4-fluorophenyl)but-3-en-2-yl)aniline was prepared following the General Procedure B as colorless oil: 46.3 mg, 96% yield, 64% ee. [Daicel Chiralcel OD-H (0.46 cm × 25 cm), *n*-hexane/*i*-PrOH = 95/5,  $\nu$  = 1.0 mL/min,  $\lambda$  = 254 nm, *t* (minor) = 12.75 min, *t* (major) = 9.52 min].

<sup>1</sup>H NMR (400 MHz, CDCl<sub>3</sub>)  $\delta$  7.35–7.26 (m, 2H), 7.16 (dd, *J* = 7.7, 7.7 Hz, 2H), 6.97 (dd, *J* = 8.7, 8.7 Hz, 2H), 6.69 (t, *J* = 7.3 Hz, 1H), 6.64 (d, *J* = 7.9 Hz, 2H), 6.53 (d, *J* = 15.9 Hz, 1H), 6.12 (dd, *J* = 16.0, 5.7 Hz, 1H), 4.18–4.07 (m, 1H), 3.70 (br, s, 1H), 1.39 (d, *J* = 6.6 Hz, 3H);

<sup>13</sup>C NMR (101 MHz, CDCl<sub>3</sub>)  $\delta$  162.2 (d, *J* = 246.4 Hz), 147.3, 133.1 (d, *J* = 3.3 Hz), 132.9 (d, *J* = 2.2 Hz), 129.2, 128.1, 127.8 (d, *J* = 8.0 Hz), 117.4, 115.4 (d, *J* = 21.5 Hz), 113.4, 50.8, 22.1;

<sup>19</sup>F NMR (377 MHz, CDCl<sub>3</sub>)  $\delta$  -114.9;

IR (neat):  $\nu_{\text{max}}$  (cm<sup>-1</sup>) = 3411, 3049, 2969, 2920, 1600, 1503, 1315, 1224, 1156;

HRMS (ESI) calcd for C<sub>16</sub>H<sub>17</sub>NF [M+H]<sup>+</sup>: 242.1340. Found: 242.1346.

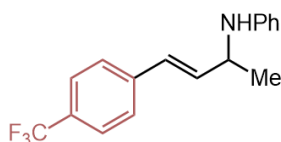

(*E*)-*N*-(4-(4-(trifluoromethyl)phenyl)but-3-en-2-yl)aniline (**3da**)

(*R,E*)-*N*-(4-(4-fluorophenyl)but-3-en-2-yl)aniline was prepared following the General Procedure A as yellow oil: 28.3 mg, 49% yield, 92% ee. [Daicel Chiralcel OD-H (0.46 cm × 25 cm), *n*-hexane/*i*-PrOH = 95/5,  $\nu$  = 1.0 mL/min,  $\lambda$  = 254 nm, *t* (minor) = 12.00 min, *t* (major) = 14.29 min]. [ $\alpha$ ]<sub>D</sub><sup>20</sup> = +47.4 (*c* = 1.0, CH<sub>2</sub>Cl<sub>2</sub>).

(*S,E*)-*N*-(4-(4-fluorophenyl)but-3-en-2-yl)aniline was prepared following the General Procedure B as yellow oil: 12.6 mg, 22% yield, 62% ee. [Daicel Chiralcel OD-H (0.46 cm × 25 cm), *n*-hexane/*i*-PrOH = 95/5,  $\nu$  = 1.0 mL/min,  $\lambda$  = 254 nm, *t* (minor) = 14.35 min, *t* (major) = 11.46 min].

Note: The low yield of (*S*)-**3da** was due to incomplete conversion.

<sup>1</sup>H NMR (400 MHz, CDCl<sub>3</sub>)  $\delta$  7.53 (d, *J* = 8.1 Hz, 2H), 7.43 (d, *J* = 8.1 Hz, 2H), 7.20–7.13 (m, 2H), 6.70 (t, *J* = 7.3 Hz, 1H), 6.67–6.57 (m, 3H), 6.32 (dd, *J* = 16.0, 5.6 Hz, 1H), 4.21–4.09 (m, 1H), 3.72 (br, s, 1H), 1.42 (d, *J* = 6.6 Hz, 3H);

<sup>13</sup>C NMR (101 MHz, CDCl<sub>3</sub>)  $\delta$  147.2, 140.5, 135.9, 129.2, 129.1 (q, *J* = 32.4 Hz), 128.0, 126.5, 125.4 (q, *J* = 3.8 Hz), 124.2 (q, *J* = 272.7 Hz), 117.5, 113.4, 50.8, 22.0;

<sup>19</sup>F NMR (377 MHz, CDCl<sub>3</sub>)  $\delta$  -62.5;

IR (neat):  $\nu_{\text{max}}$  (cm<sup>-1</sup>) = 3427, 3054, 3028, 2977, 2929, 1604, 1501, 1323, 1158, 1118;

HRMS (ESI) calcd for  $C_{17}H_{17}NF_3$   $[M+H]^+$ : 292.1308. Found: 292.1313.

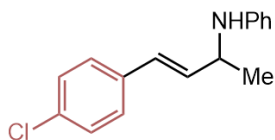

(*E*)-*N*-(4-(4-chlorophenyl)but-3-en-2-yl)aniline (**3ea**)

(*R,E*)-*N*-(4-(4-chlorophenyl)but-3-en-2-yl)aniline was prepared following the General Procedure A as a yellow solid: 38.6 mg, 75% yield, 93% ee. [Daicel Chiralcel OD-H (0.46 cm  $\times$  25 cm), *n*-hexane/*i*-PrOH = 95/5,  $v$  = 1.0 mL/min,  $\lambda$  = 254 nm,  $t$  (minor) = 11.08 min,  $t$  (major) = 13.71 min].  $[\alpha]_D^{20}$  = +67.9 ( $c$  = 1.0,  $CH_2Cl_2$ ).

(*S,E*)-*N*-(4-(4-chlorophenyl)but-3-en-2-yl)aniline was prepared following the General Procedure B as a yellow solid: 48.2 mg, 93% yield, 68% ee. [Daicel Chiralcel OD-H (0.46 cm  $\times$  25 cm), *n*-hexane/*i*-PrOH = 95/5,  $v$  = 1.0 mL/min,  $\lambda$  = 254 nm,  $t$  (minor) = 13.97 min,  $t$  (major) = 10.75 min].

$^1H$  NMR (400 MHz,  $CDCl_3$ )  $\delta$  7.28–7.21 (m, 4H), 7.19–7.12 (m, 2H), 6.69 (t,  $J$  = 7.3 Hz, 1H), 6.63 (d,  $J$  = 8.0 Hz, 2H), 6.52 (d,  $J$  = 16.0 Hz, 1H), 6.18 (dd,  $J$  = 16.0, 5.7 Hz, 1H), 4.17–4.07 (m, 1H), 3.70 (br, s, 1H), 1.39 (d,  $J$  = 6.6 Hz, 3H);

$^{13}C$  NMR (101 MHz,  $CDCl_3$ )  $\delta$  147.3, 135.5, 133.9, 132.9, 129.2, 128.6, 128.1, 127.5, 117.4, 113.4, 50.8, 22.0;

IR (thin film):  $\nu_{max}$  ( $cm^{-1}$ ) = 3408, 3049, 3022, 2967, 2925, 2865, 1600, 1501, 1488, 1315;

HRMS (ESI) calcd for  $C_{16}H_{16}NCINa$   $[M+Na]^+$ : 280.0863. Found: 280.0871.

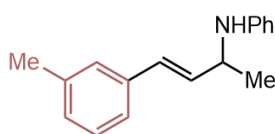

(*E*)-*N*-(4-(m-tolyl)but-3-en-2-yl)aniline (**3fa**)

(*R,E*)-*N*-(4-(m-tolyl)but-3-en-2-yl)aniline was prepared following the General Procedure A as colorless oil: 44.8 mg, 94% yield, 92% ee. [Daicel Chiralcel OD-H (0.46 cm  $\times$  25 cm), *n*-hexane/*i*-PrOH = 95/5,  $v$  = 1.0 mL/min,  $\lambda$  = 254 nm,  $t$  (minor) = 9.59 min,  $t$  (major) = 11.20 min].  $[\alpha]_D^{20}$  = +61.9 ( $c$  = 1.0,  $CH_2Cl_2$ ).

(*S,E*)-*N*-(4-(m-tolyl)but-3-en-2-yl)aniline was prepared following the General Procedure B as colorless oil: 46.3 mg, 98% yield, 58% ee. [Daicel Chiralcel OD-H (0.46 cm  $\times$  25 cm), *n*-hexane/*i*-PrOH = 95/5,  $v$  = 1.0 mL/min,  $\lambda$  = 254 nm,  $t$  (minor) = 11.57 min,  $t$  (major) = 9.16 min].

$^1\text{H}$  NMR (400 MHz,  $\text{CDCl}_3$ )  $\delta$  7.20–7.12 (m, 5H), 7.04–7.00 (m, 1H), 6.71–6.61 (m, 3H), 6.54 (d,  $J$  = 15.9 Hz, 1H), 6.20 (dd,  $J$  = 16.0, 5.8 Hz, 1H), 4.18–4.08 (m, 1H), 3.70 (br, s, 1H), 2.32 (s, 3H), 1.39 (d,  $J$  = 6.6 Hz, 3H);  
 $^{13}\text{C}$  NMR (101 MHz,  $\text{CDCl}_3$ )  $\delta$  147.4, 138.0, 136.9, 133.0, 129.3, 129.2, 128.4, 128.1, 127.0, 123.5, 117.3, 113.4, 50.8, 22.1, 21.3;

IR (neat):  $\nu_{\text{max}}$  ( $\text{cm}^{-1}$ ) = 3406, 3054, 3020, 2967, 2920, 2865, 1598, 1501, 1313, 960;

HRMS (ESI) calcd for  $\text{C}_{17}\text{H}_{20}\text{N}$   $[\text{M}+\text{H}]^+$ : 238.1590. Found: 238.1595.

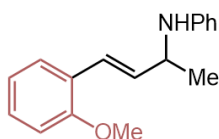

(*E*)-*N*-(4-(2-methoxyphenyl)but-3-en-2-yl)aniline (**3ga**)

(*R,E*)-*N*-(4-(2-methoxyphenyl)but-3-en-2-yl)aniline was prepared following the General Procedure A as colorless oil: 42.0 mg, 83% yield, 92% ee. [Daicel Chiralcel OD-H (0.46 cm  $\times$  25 cm), *n*-hexane/*i*-PrOH = 95/5,  $\nu$  = 1.0 mL/min,  $\lambda$  = 254 nm,  $t$  (minor) = 16.35 min,  $t$  (major) = 12.32 min].  $[\alpha]_{\text{D}}^{20}$  = +45.3 ( $c$  = 1.0,  $\text{CH}_2\text{Cl}_2$ ).

(*S,E*)-*N*-(4-(2-methoxyphenyl)but-3-en-2-yl)aniline was prepared following the General Procedure B as colorless oil: 48.1 mg, 95% yield, 27% ee. [Daicel Chiralcel OD-H (0.46 cm  $\times$  25 cm), *n*-hexane/*i*-PrOH = 95/5,  $\nu$  = 1.0 mL/min,  $\lambda$  = 254 nm,  $t$  (minor) = 12.48 min,  $t$  (major) = 15.62 min].

$^1\text{H}$  NMR (400 MHz,  $\text{CDCl}_3$ )  $\delta$  7.40 (d,  $J$  = 7.6 Hz, 1H), 7.22–7.11 (m, 3H), 6.94–6.82 (m, 3H), 6.71–6.61 (m, 3H), 6.21 (dd,  $J$  = 16.1, 6.1 Hz, 1H), 4.21–4.11 (m, 1H), 3.82 (s, 3H), 3.78–3.61 (br, s, 1H), 1.40 (d,  $J$  = 6.6 Hz, 3H);

$^{13}\text{C}$  NMR (101 MHz,  $\text{CDCl}_3$ )  $\delta$  156.6, 147.5, 133.9, 129.1, 128.4, 126.7, 126.0, 124.2, 120.6, 117.2, 113.5, 110.9, 55.5, 51.2, 22.1;

IR (neat):  $\nu_{\text{max}}$  ( $\text{cm}^{-1}$ ) = 3400, 2984, 2956, 2920, 2844, 1608, 1505, 1319, 1239, 1027;

HRMS (ESI) calcd for  $\text{C}_{17}\text{H}_{20}\text{NO}$   $[\text{M}+\text{H}]^+$ : 254.1539. Found: 254.1545.

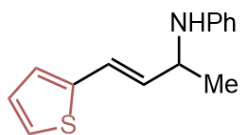

(*E*)-*N*-(4-(thiophen-2-yl)but-3-en-2-yl)aniline (**3ha**)

(*R,E*)-*N*-(4-(thiophen-2-yl)but-3-en-2-yl)aniline was prepared following the General Procedure A as yellow oil: 28.8 mg, 63% yield, 91% ee. [Daicel Chiralcel OD-H (0.46 cm × 25 cm), *n*-hexane/*i*-PrOH = 95/5,  $\nu$  = 1.0 mL/min,  $\lambda$  = 254 nm,  $t$  (minor) = 11.47 min,  $t$  (major) = 14.90 min].  $[\alpha]_{\text{D}}^{20}$  = +69.4 ( $c$  = 1.0, CH<sub>2</sub>Cl<sub>2</sub>).

(*S,E*)-*N*-(4-(thiophen-2-yl)but-3-en-2-yl)aniline was prepared following the General Procedure B as yellow oil: 43.4 mg, 95% yield, 34% ee. [Daicel Chiralcel OD-H (0.46 cm × 25 cm), *n*-hexane/*i*-PrOH = 95/5,  $\nu$  = 1.0 mL/min,  $\lambda$  = 254 nm,  $t$  (minor) = 14.60 min,  $t$  (major) = 10.65 min].

<sup>1</sup>H NMR (400 MHz, CDCl<sub>3</sub>)  $\delta$  7.21–7.13 (m, 2H), 7.11 (d,  $J$  = 5.0 Hz, 1H), 6.93 (dd,  $J$  = 5.1, 3.5 Hz, 1H), 6.91–6.88 (m, 1H), 6.74–6.66 (m, 2H), 6.65–6.60 (m, 2H), 6.07 (dd,  $J$  = 15.8, 5.6 Hz, 1H), 4.13–4.04 (m, 1H), 3.68 (br, s, 1H), 1.38 (d,  $J$  = 6.6 Hz, 3H);

<sup>13</sup>C NMR (101 MHz, CDCl<sub>3</sub>)  $\delta$  147.3, 142.2, 132.8, 129.2, 127.3, 125.3, 123.8, 122.5, 117.4, 113.3, 50.6, 22.0;

IR (neat):  $\nu_{\text{max}}$  (cm<sup>-1</sup>) = 3406, 3051, 3018, 2967, 2925, 2865, 1600, 1503, 1317, 956;

HRMS (ESI) calcd for C<sub>14</sub>H<sub>16</sub>NS  $[M+H]^+$ : 230.0998. Found: 230.1005.

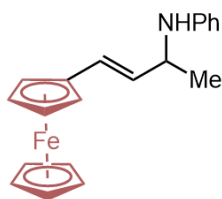

(*E*)-*N*-[4-(ferrocenyl)but-3-en-2-yl]aniline (**3ia**)

(*R,E*)-*N*-[4-(ferrocenyl)but-3-en-2-yl]aniline was prepared following the General Procedure A as an orange-yellow solid: 52.8 mg, 80% yield, 68% ee. [Daicel Chiralcel OD-H (0.46 cm × 25 cm), *n*-hexane/*i*-PrOH = 95/5,  $\nu$  = 1.0 mL/min,  $\lambda$  = 254 nm,  $t$  (minor) = 15.46 min,  $t$  (major) = 16.85 min].  $[\alpha]_{\text{D}}^{20}$  = +21.2 ( $c$  = 1.0, CH<sub>2</sub>Cl<sub>2</sub>).

(*S,E*)-*N*-[4-(ferrocenyl)but-3-en-2-yl]aniline was prepared following the General Procedure B as an orange-yellow solid: 60.8 mg, 92% yield, 13% ee. [Daicel Chiralcel OD-H (0.46 cm × 25 cm), *n*-hexane/*i*-PrOH = 95/5,  $\nu$  = 1.0 mL/min,  $\lambda$  = 254 nm,  $t$  (minor) = 15.68 min,  $t$  (major) = 13.45 min].

<sup>1</sup>H NMR (400 MHz, CDCl<sub>3</sub>)  $\delta$  7.21–7.14 (m, 2H), 6.71–6.65 (m, 3H), 6.28 (d,  $J$  = 15.8 Hz, 1H), 5.76 (dd,  $J$  = 15.8, 6.1 Hz, 1H), 4.31–4.25 (m, 2H), 4.18–4.14 (m, 2H), 4.08–3.95 (m, 6H), 3.67 (br, s, 1H), 1.34 (d,  $J$  = 6.6 Hz, 3H);

<sup>13</sup>C NMR (101 MHz, CDCl<sub>3</sub>)  $\delta$  147.6, 130.3, 129.1, 126.8, 117.4, 113.6, 82.9, 69.0, 68.53, 68.47, 66.7, 66.5, 51.1, 22.3;

IR (thin film):  $\nu_{\max}$  (cm<sup>-1</sup>) = 3394, 3089, 2963, 2920, 2851, 1604, 1503, 1101, 956;

HRMS (ESI) calcd for C<sub>20</sub>H<sub>21</sub>NFe [M]<sup>+</sup>: 331.1018. Found: 331.1023.

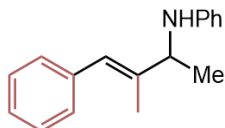

**(*E*)-*N*-(3-methyl-4-phenylbut-3-en-2-yl)aniline (3ja)**

(*R,E*)-*N*-(3-methyl-4-phenylbut-3-en-2-yl)aniline was prepared following the General Procedure A as colorless oil: 39.1 mg, 82% yield, 92% ee. [Daicel Chiralcel AD-H (0.46 cm × 25 cm), *n*-hexane/*i*-PrOH = 97/3,  $\nu$  = 1.0 mL/min,  $\lambda$  = 254 nm, *t* (minor) = 5.58 min, *t* (major) = 6.10 min]. [ $\alpha$ ]<sub>D</sub><sup>20</sup> = +27.5 (*c* = 1.0, CH<sub>2</sub>Cl<sub>2</sub>).

(*S,E*)-*N*-(3-methyl-4-phenylbut-3-en-2-yl)aniline was prepared following the General Procedure B as colorless oil: 44.9 mg, 95% yield, 67% ee. [Daicel Chiralcel AD-H (0.46 cm × 25 cm), *n*-hexane/*i*-PrOH = 97/3,  $\nu$  = 1.0 mL/min,  $\lambda$  = 254 nm, *t* (minor) = 5.89 min, *t* (major) = 5.46 min].

<sup>1</sup>H NMR (400 MHz, CDCl<sub>3</sub>)  $\delta$  7.33–7.28 (m, 2H), 7.26–7.21 (m, 2H), 7.21–7.10 (m, 3H), 6.70–6.65 (m, 1H), 6.64–6.59 (m, 2H), 6.56 (s, 1H), 3.97 (q, *J* = 6.7 Hz, 1H), 3.80 (br, s, 1H), 1.84 (d, *J* = 1.4 Hz, 3H), 1.40 (d, *J* = 6.7 Hz, 3H);

<sup>13</sup>C NMR (101 MHz, CDCl<sub>3</sub>)  $\delta$  147.5, 140.5, 138.0, 129.1, 128.9, 128.0, 126.2, 125.0, 117.1, 113.2, 56.8, 21.5, 13.8;

IR (neat):  $\nu_{\max}$  (cm<sup>-1</sup>) = 3411, 3054, 3020, 2971, 2923, 1600, 1503, 1317, 1254;

HRMS (ESI) calcd for C<sub>17</sub>H<sub>20</sub>N [M+H]<sup>+</sup>: 238.1590. Found: 238.1597.

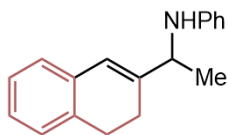

***N*-(1-(3,4-dihydronaphthalen-2-yl)ethyl)aniline (3ka)**

(*R*)-*N*-(1-(3,4-dihydronaphthalen-2-yl)ethyl)aniline was prepared following the General Procedure A as yellow oil: 22.5 mg, 45% yield, 70% ee. [Daicel Chiralcel AD-H (0.46 cm × 25 cm), *n*-hexane/*i*-PrOH = 97/3,  $\nu$  = 1.0 mL/min,  $\lambda$  = 254 nm, *t* (minor) = 6.33 min, *t* (major) = 7.14 min]. [ $\alpha$ ]<sub>D</sub><sup>20</sup> = +32.8 (*c* = 0.5, CH<sub>2</sub>Cl<sub>2</sub>).

(*S*)-*N*-(1-(3,4-dihydronaphthalen-2-yl)ethyl)aniline was prepared following the General Procedure B as yellow oil: 18.9 mg, 38% yield, 85% ee. [Daicel Chiralcel AD-H (0.46 cm × 25 cm), *n*-hexane/*i*-PrOH = 97/3,  $\nu$  = 1.0 mL/min,  $\lambda$  = 254 nm, *t* (minor) = 6.92 min, *t* (major) = 6.18 min].

<sup>1</sup>H NMR (400 MHz, CDCl<sub>3</sub>)  $\delta$  7.15–7.06 (m, 5H), 7.02–6.98 (m, 1H), 6.66 (t, *J* = 7.3 Hz, 1H), 6.63–6.59 (m, 2H), 6.46 (s, 1H), 4.03 (q, *J* = 6.7 Hz, 1H), 3.78 (br, s, 1H), 2.87–2.70 (m, 2H), 2.28 (t, *J* = 8.1 Hz, 2H), 1.39 (d, *J* = 6.7 Hz, 3H);

<sup>13</sup>C NMR (101 MHz, CDCl<sub>3</sub>)  $\delta$  147.5, 143.6, 135.0, 134.4, 129.1, 127.2, 126.5, 126.4, 125.9, 122.3, 117.2, 113.3, 54.3, 28.2, 23.6, 21.2;

IR (neat):  $\nu_{\text{max}}$  (cm<sup>-1</sup>) = 3413, 3018, 2965, 2927, 2878, 2825, 1602, 1503, 1315;

HRMS (ESI) calcd for C<sub>18</sub>H<sub>19</sub>NNa [M+Na]<sup>+</sup>: 272.1410. Found: 272.1416.

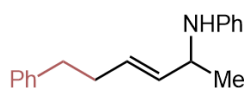

(*E*)-*N*-(6-phenylhex-3-en-2-yl)aniline (**3la**)

(*R,E*)-*N*-(6-phenylhex-3-en-2-yl)aniline was prepared following the General Procedure A as colorless oil: 24.6 mg, 49% yield, 81% ee. [Daicel Chiralcel OD-H (0.46 cm × 25 cm), *n*-hexane/*i*-PrOH = 95/5,  $\nu$  = 1.0 mL/min,  $\lambda$  = 254 nm, *t* (minor) = 7.76 min, *t* (major) = 8.55 min]. [ $\alpha$ ]<sub>D</sub><sup>20</sup> = +15.0 (*c* = 1.0, CH<sub>2</sub>Cl<sub>2</sub>).

(*S,E*)-*N*-(6-phenylhex-3-en-2-yl)aniline was prepared following the General Procedure B as colorless oil: 42.7 mg, 85% yield, 44% ee. [Daicel Chiralcel OD-H (0.46 cm × 25 cm), *n*-hexane/*i*-PrOH = 95/5,  $\nu$  = 1.0 mL/min,  $\lambda$  = 254 nm, *t* (minor) = 8.55 min, *t* (major) = 7.33 min].

<sup>1</sup>H NMR (400 MHz, CDCl<sub>3</sub>)  $\delta$  7.27–7.22 (m, 2H), 7.20–7.10 (m, 5H), 6.68 (t, *J* = 7.3 Hz, 1H), 6.60–6.55 (m, 2H), 5.71–5.60 (m, 1H), 5.41 (dd, *J* = 15.4, 6.0 Hz, 1H), 3.98–3.86 (m, 1H), 3.57 (br, s, 1H), 2.66 (t, *J* = 7.7 Hz, 2H), 2.39–2.27 (m, 2H), 1.25 (d, *J* = 6.5 Hz, 3H);

<sup>13</sup>C NMR (101 MHz, CDCl<sub>3</sub>)  $\delta$  147.5, 141.8, 133.8, 129.4, 129.1, 128.5, 128.2, 125.7, 117.1, 113.4, 50.4, 35.8, 34.0, 22.0;

IR (neat):  $\nu_{\text{max}}$  (cm<sup>-1</sup>) = 3406, 3024, 2971, 2920, 2853, 1600, 1501, 1317;

HRMS (ESI) calcd for C<sub>18</sub>H<sub>22</sub>N [M+H]<sup>+</sup>: 252.1747. Found: 252.1752.



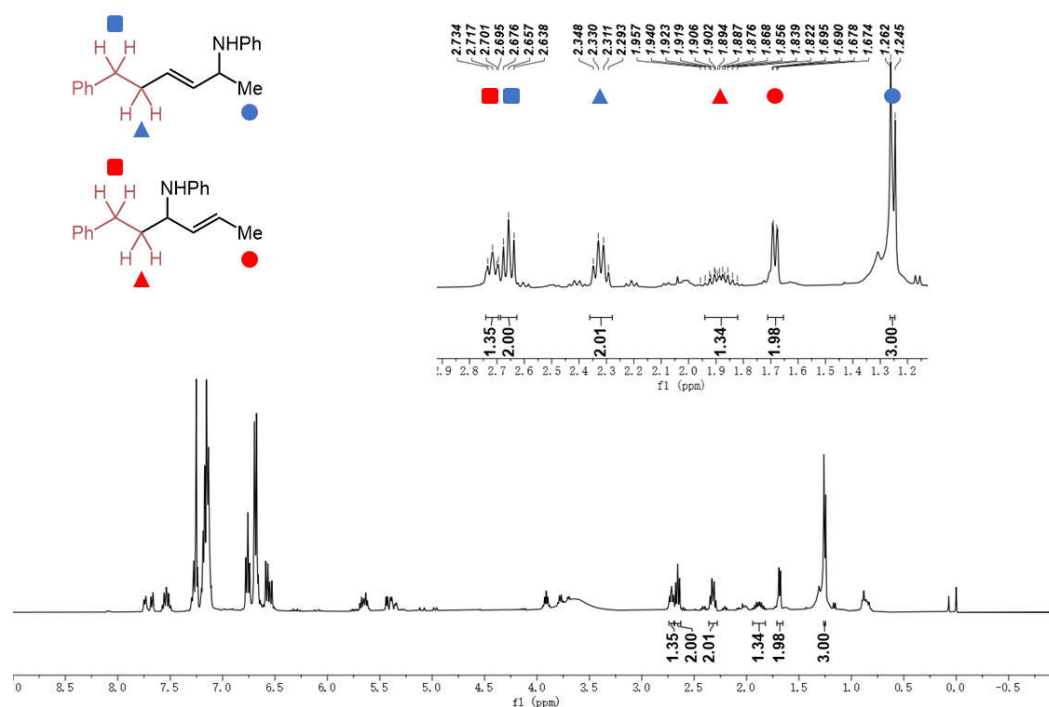

**Figure S2.**  $^1\text{H}$  NMR analysis for determining the ratio of regioisomers in the crude product (*S*)-**3la**.

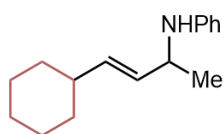

(*E*)-*N*-(4-cyclohexylbut-3-en-2-yl)aniline (**3ma**)

(*R,E*)-*N*-(4-cyclohexylbut-3-en-2-yl)aniline was prepared following the General Procedure A as yellow oil: 20.0 mg, 44% yield, 87% ee. [Daicel Chiralcel OD-H (0.46 cm  $\times$  25 cm), *n*-hexane/*i*-PrOH = 100/0,  $v$  = 1.0 mL/min,  $\lambda$  = 254 nm,  $t$  (minor) = 17.07 min,  $t$  (major) = 19.36 min].  $[\alpha]_{\text{D}}^{20}$  = +18.2 ( $c$  = 0.5,  $\text{CH}_2\text{Cl}_2$ ).

(*S,E*)-*N*-(4-cyclohexylbut-3-en-2-yl)aniline was prepared following the General Procedure B as yellow oil: 35.4 mg, 77% yield, 30% ee. [Daicel Chiralcel OD-H (0.46 cm  $\times$  25 cm), *n*-hexane/*i*-PrOH = 100/0,  $v$  = 1.0 mL/min,  $\lambda$  = 254 nm,  $t$  (minor) = 19.99 min,  $t$  (major) = 16.72 min].

$^1\text{H}$  NMR (400 MHz,  $\text{CDCl}_3$ )  $\delta$  7.17–7.10 (m, 2H), 6.69–6.63 (m, 1H), 6.63–6.56 (m, 2H), 5.57 (dd,  $J$  = 15.6, 6.6 Hz, 1H), 5.35 (dd,  $J$  = 15.6, 6.1 Hz, 1H), 4.00–3.83 (m, 1H), 3.58 (br, s, 1H), 1.97–1.83 (m, 1H), 1.73–1.58 (m, 5H), 1.27 (d,  $J$  = 6.6 Hz, 3H), 1.26–1.18 (m, 2H), 1.18–1.10 (m, 1H), 1.10–0.98 (m, 2H);

$^{13}\text{C}$  NMR (101 MHz,  $\text{CDCl}_3$ )  $\delta$  147.6, 136.5, 130.4, 129.0, 117.0, 113.5, 50.7, 40.3, 33.0, 32.9, 26.2, 26.0, 22.1;

IR (neat):  $\nu_{\text{max}}$  ( $\text{cm}^{-1}$ ) = 3411, 2969, 2920, 2849, 1600, 1499, 1315, 966;

HRMS (ESI) calcd for  $\text{C}_{16}\text{H}_{24}\text{N}$   $[\text{M}+\text{H}]^+$ : 230.1903. Found: 230.1912.

## VI. Crystallographic Data

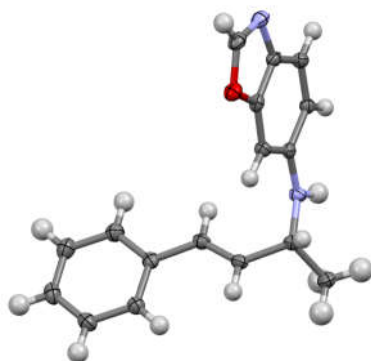

**Figure S3.** X-ray crystallographic structure of (*R*)-**3an** (CCDC #2491238)

**Table S19.** Crystal data and structure refinement for (*R*)-**3an**

|                                                              |                                                                              |
|--------------------------------------------------------------|------------------------------------------------------------------------------|
| Identification code                                          | ( <i>R</i> )- <b>3an</b>                                                     |
| Empirical formula                                            | C <sub>17</sub> H <sub>16</sub> N <sub>2</sub> O                             |
| Formula weight                                               | 264.32                                                                       |
| Temperature/K                                                | 130.00                                                                       |
| Crystal system                                               | orthorhombic                                                                 |
| Space group                                                  | P2 <sub>1</sub> 2 <sub>1</sub> 2 <sub>1</sub>                                |
| <i>a</i> /Å                                                  | 4.6491(13)                                                                   |
| <i>b</i> /Å                                                  | 12.775(3)                                                                    |
| <i>c</i> /Å                                                  | 22.835(6)                                                                    |
| $\alpha$ /°                                                  | 90                                                                           |
| $\beta$ /°                                                   | 90                                                                           |
| $\gamma$ /°                                                  | 90                                                                           |
| Volume/Å <sup>3</sup>                                        | 1356.3(6)                                                                    |
| <i>Z</i>                                                     | 4                                                                            |
| $\rho_{\text{calc}}/\text{cm}^3$                             | 1.294                                                                        |
| $\mu/\text{mm}^{-1}$                                         | 0.411                                                                        |
| <i>F</i> (000)                                               | 560.0                                                                        |
| Crystal size/mm <sup>3</sup>                                 | 0.12 × 0.11 × 0.1                                                            |
| Radiation                                                    | GaK $\alpha$ ( $\lambda$ = 1.34139)                                          |
| 2 $\theta$ range for data collection/°                       | 6.736 to 115.864                                                             |
| Index ranges                                                 | -3 ≤ <i>h</i> ≤ 5, -16 ≤ <i>k</i> ≤ 16, -28 ≤ <i>l</i> ≤ 28                  |
| Reflections collected                                        | 22137                                                                        |
| Independent reflections                                      | 2797 [ <i>R</i> <sub>int</sub> = 0.0453, <i>R</i> <sub>sigma</sub> = 0.0232] |
| Data/restraints/parameters                                   | 2797/0/186                                                                   |
| Goodness-of-fit on <i>F</i> <sup>2</sup>                     | 1.055                                                                        |
| Final <i>R</i> indexes [ <i>I</i> ≥ 2 $\sigma$ ( <i>I</i> )] | <i>R</i> <sub>1</sub> = 0.0273, <i>wR</i> <sub>2</sub> = 0.0693              |
| Final <i>R</i> indexes [all data]                            | <i>R</i> <sub>1</sub> = 0.0287, <i>wR</i> <sub>2</sub> = 0.0705              |
| Largest diff. peak/hole / e Å <sup>-3</sup>                  | 0.13/-0.14                                                                   |
| Flack parameter                                              | -0.06(14)                                                                    |

## VII. References

- [S1] Ren, T.; Wang, X.; Cong H. *Chin. J. Org. Chem.* **2025**, *45*, 2208-2221.
- [S2] Long, J.; Wang, P.; Wang, W.; Li, Y.-Q.; Yin, G.-Y. *iScience* **2019**, *22*, 369-379.
- [S3] Bhowmik, A.; Fernandes, R. A. *Org. Lett.* **2019**, *21*, 9203-9207.
- [S4] Adamson, N. J.; Hull, E.; Malcolmson, S. J. *J. Am. Chem. Soc.* **2017**, *139*, 7180-7183.
- [S5] Goldfogel, M. J.; Roberts, C. C.; Meek, S. J. *J. Am. Chem. Soc.* **2014**, *136*, 6227-6230.
- [S6] Denmark, S. E.; Nakajima, N.; Stiff, C. M.; Nicaise, O. J. C.; Kranz, M. *Adv. Synth. Catal.* **2008**, *350*, 1023-1045.
- [S7] Hood, T. S.; Huehls, C. B.; Yang, J. *Tetrahedron Lett.* **2012**, *53*, 4679-4682.

## VIII. Copies of NMR and HPLC Spectra

$^1\text{H}$  NMR (400 MHz,  $\text{CDCl}_3$ ) spectrum of **3aa**

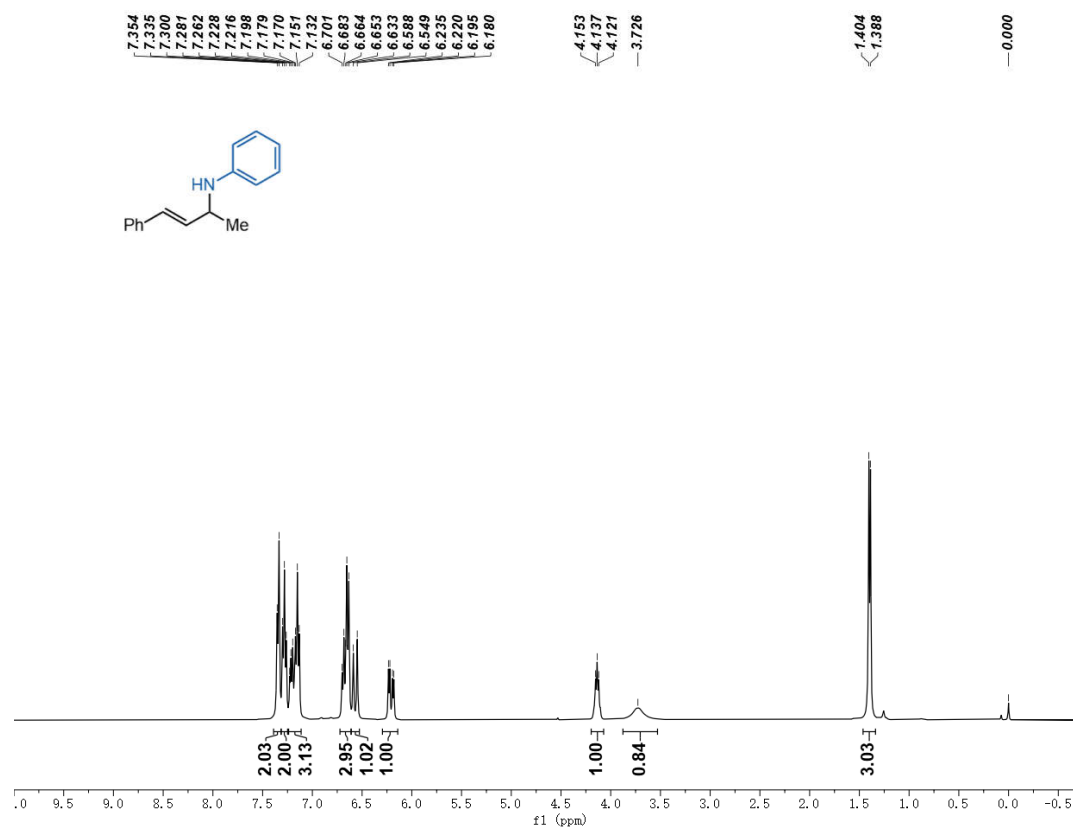

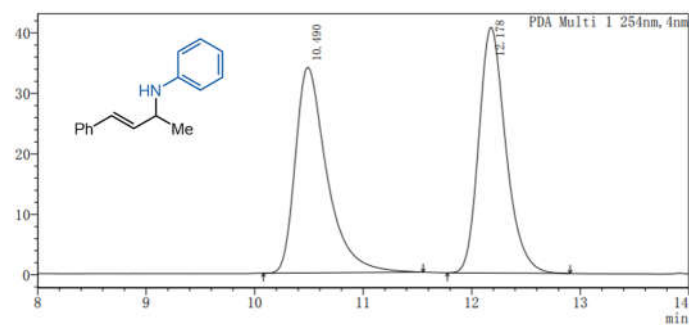

Entry Retention time Area Height Area%

PDA Ch1 254nm

| 峰号 | 保留时间   | 面积      | 高度    | 面积%     |
|----|--------|---------|-------|---------|
| 1  | 10.490 | 688249  | 33974 | 49.466  |
| 2  | 12.178 | 703106  | 40580 | 50.534  |
| 总计 |        | 1391355 | 74553 | 100.000 |

Total

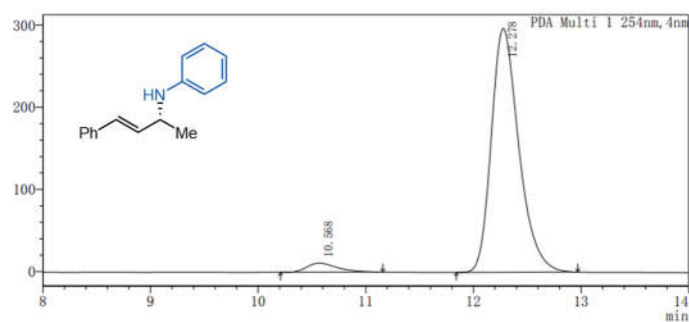

Entry Retention time Area Height Area%

PDA Ch1 254nm

| 峰号 | 保留时间   | 面积      | 高度     | 面积%     |
|----|--------|---------|--------|---------|
| 1  | 10.568 | 216391  | 11075  | 3.938   |
| 2  | 12.278 | 5278145 | 296861 | 96.062  |
| 总计 |        | 5494535 | 307936 | 100.000 |

Total

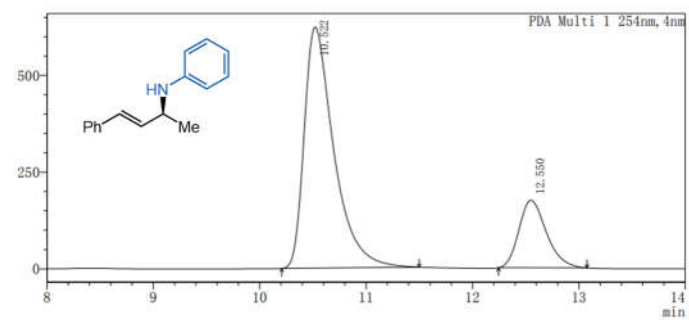

Entry Retention time Area Height Area%

PDA Ch1 254nm

| 峰号 | 保留时间   | 面积       | 高度     | 面积%     |
|----|--------|----------|--------|---------|
| 1  | 10.522 | 12081775 | 623211 | 79.384  |
| 2  | 12.550 | 3137696  | 174324 | 20.616  |
| 总计 |        | 15219471 | 797535 | 100.000 |

Total

<sup>1</sup>H NMR (400 MHz, CDCl<sub>3</sub>) spectrum of **3ab**

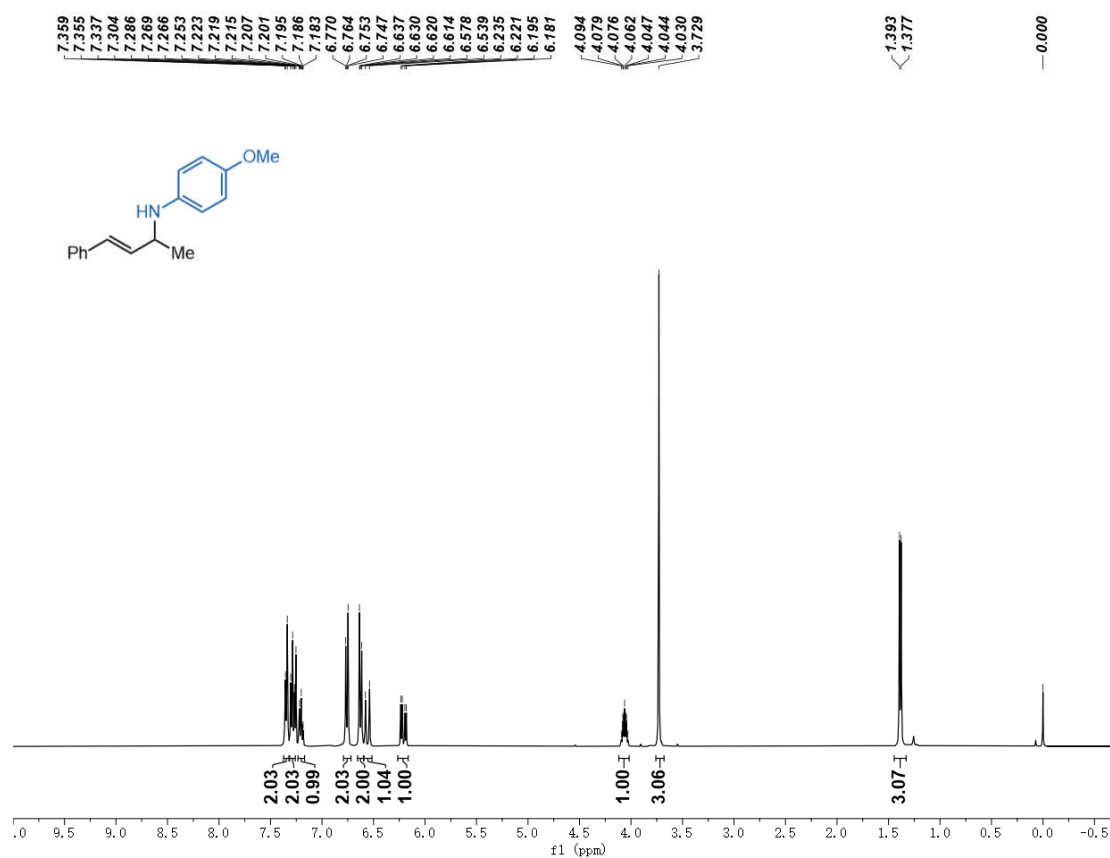

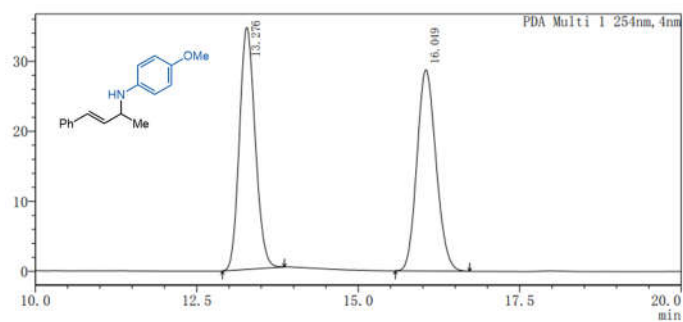

Entry Retention time Area Height Area%

PDA Ch1 254nm

| 峰号 | 保留时间   | 面积      | 高度    | 面积%     |
|----|--------|---------|-------|---------|
| 1  | 13.276 | 587921  | 34516 | 49.760  |
| 2  | 16.049 | 593581  | 28721 | 50.240  |
| 总计 |        | 1181502 | 63237 | 100.000 |

Total

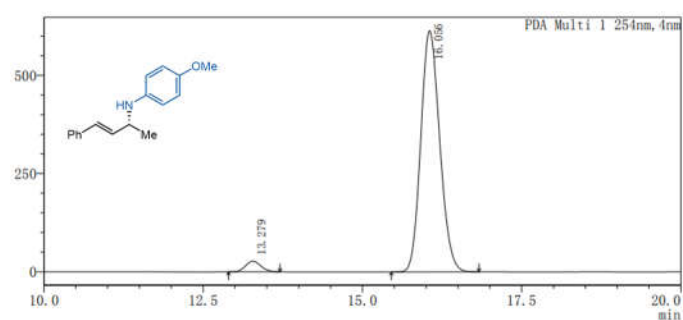

Entry Retention time Area Height Area%

PDA Ch1 254nm

| 峰号 | 保留时间   | 面积       | 高度     | 面积%     |
|----|--------|----------|--------|---------|
| 1  | 13.279 | 457401   | 27187  | 3.476   |
| 2  | 16.056 | 12700005 | 614189 | 96.524  |
| 总计 |        | 13157406 | 641376 | 100.000 |

Total

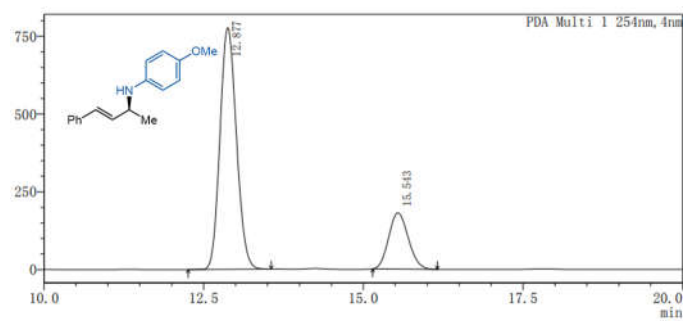

Entry Retention time Area Height Area%

PDA Ch1 254nm

| 峰号 | 保留时间   | 面积       | 高度     | 面积%     |
|----|--------|----------|--------|---------|
| 1  | 12.877 | 13915712 | 776330 | 78.276  |
| 2  | 15.543 | 3862126  | 180956 | 21.724  |
| 总计 |        | 17777838 | 957287 | 100.000 |

Total

$^1\text{H}$  NMR (400 MHz,  $\text{CDCl}_3$ ) spectrum of **3ac**

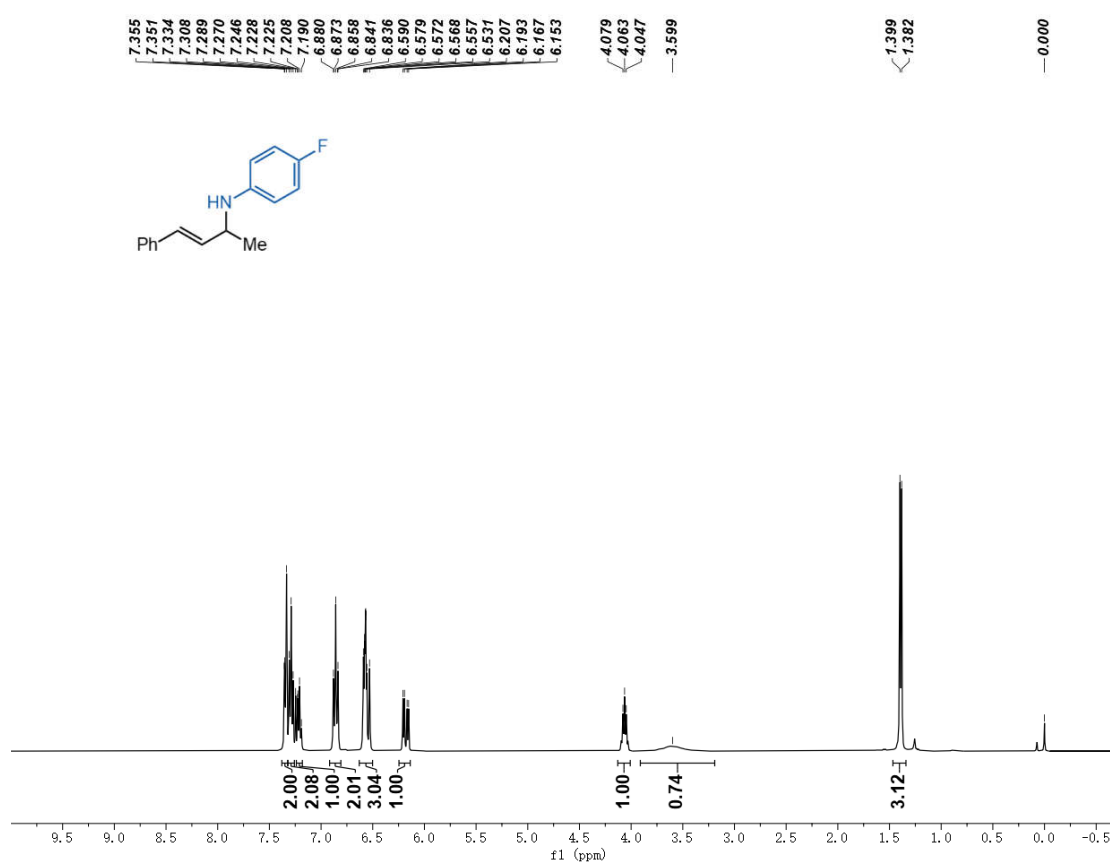

$^{13}\text{C}$  NMR (101 MHz,  $\text{CDCl}_3$ ) spectrum of **3ac**

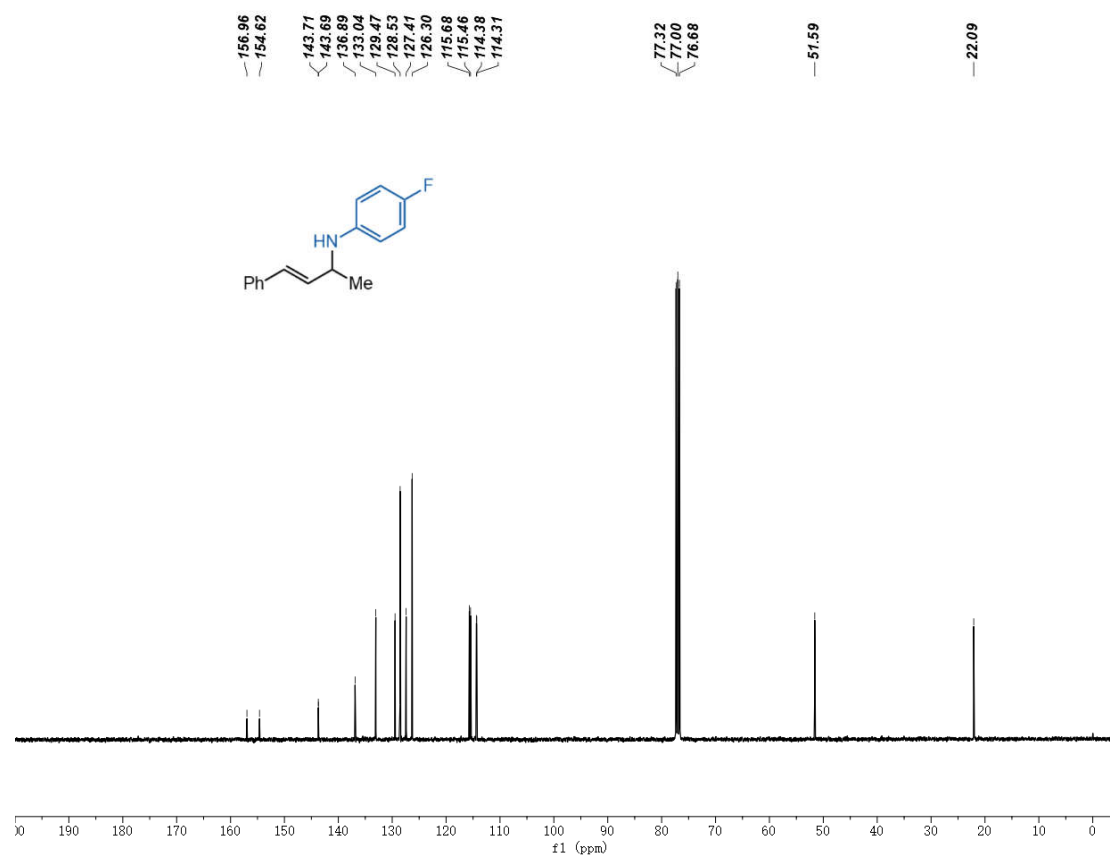



$^{19}\text{F}$  NMR (377 MHz,  $\text{CDCl}_3$ ) spectrum of **3ac**

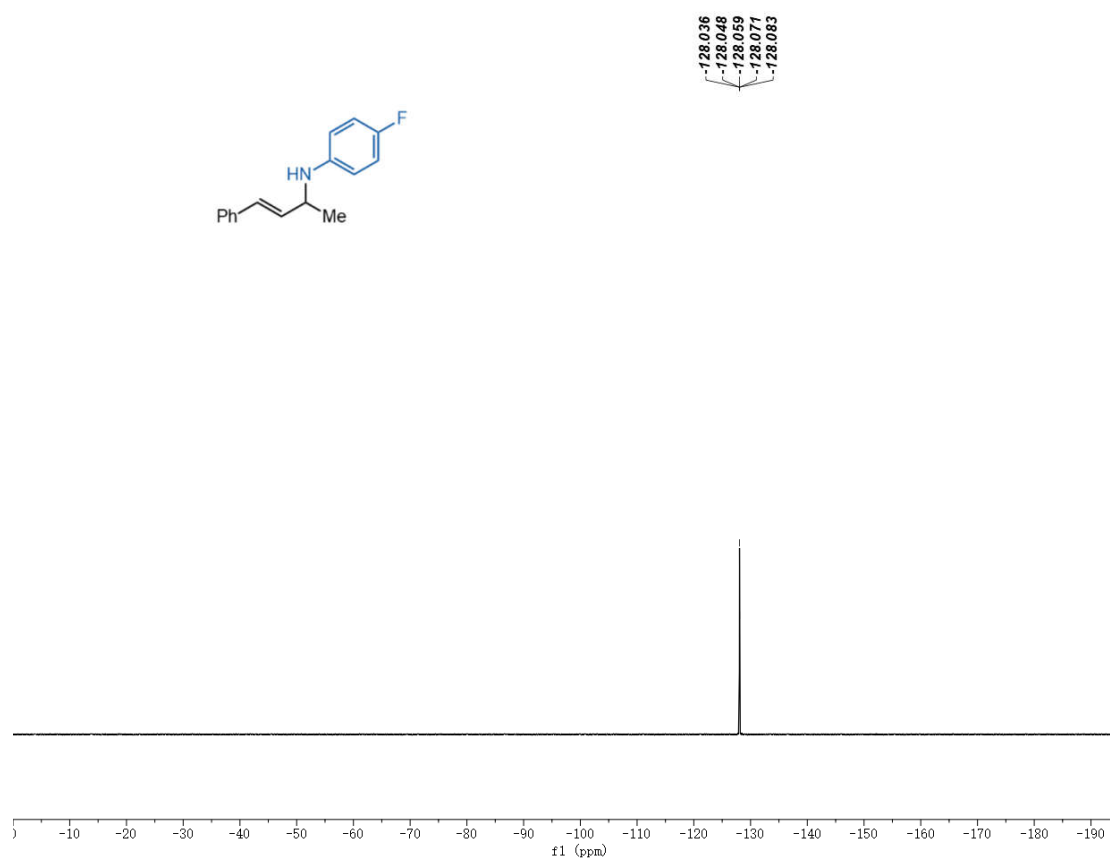

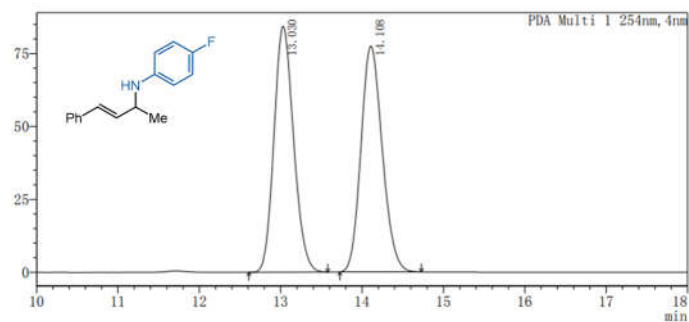

Entry Retention time Area Height Area%

PDA Ch1 254nm

| 峰号 | 保留时间   | 面积      | 高度     | 面积%     |
|----|--------|---------|--------|---------|
| 1  | 13.030 | 1414947 | 84274  | 50.048  |
| 2  | 14.108 | 1412257 | 77454  | 49.952  |
| 总计 |        | 2827205 | 161727 | 100.000 |

Total

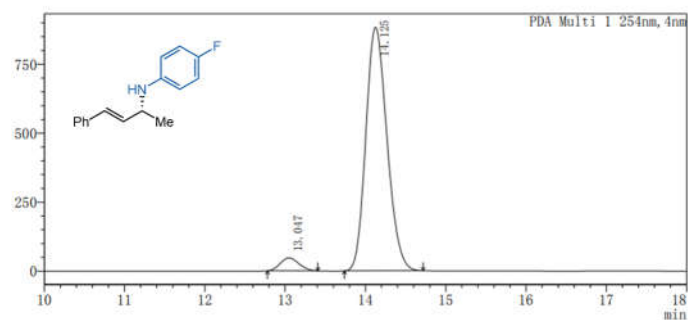

Entry Retention time Area Height Area%

PDA Ch1 254nm

| 峰号 | 保留时间   | 面积       | 高度     | 面积%     |
|----|--------|----------|--------|---------|
| 1  | 13.047 | 755218   | 46885  | 4.457   |
| 2  | 14.125 | 16187865 | 882696 | 95.543  |
| 总计 |        | 16943083 | 929581 | 100.000 |

Total

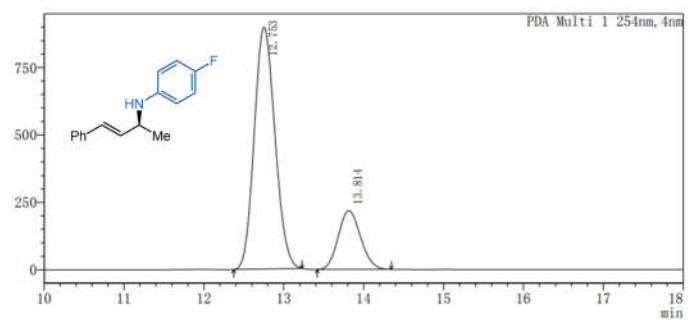

Entry Retention time Area Height Area%

PDA Ch1 254nm

| 峰号 | 保留时间   | 面积       | 高度      | 面积%     |
|----|--------|----------|---------|---------|
| 1  | 12.753 | 16200250 | 896290  | 79.245  |
| 2  | 13.814 | 4242957  | 217971  | 20.755  |
| 总计 |        | 20443207 | 1114260 | 100.000 |

Total

$^1\text{H}$  NMR (400 MHz,  $\text{CDCl}_3$ ) spectrum of **3ad**

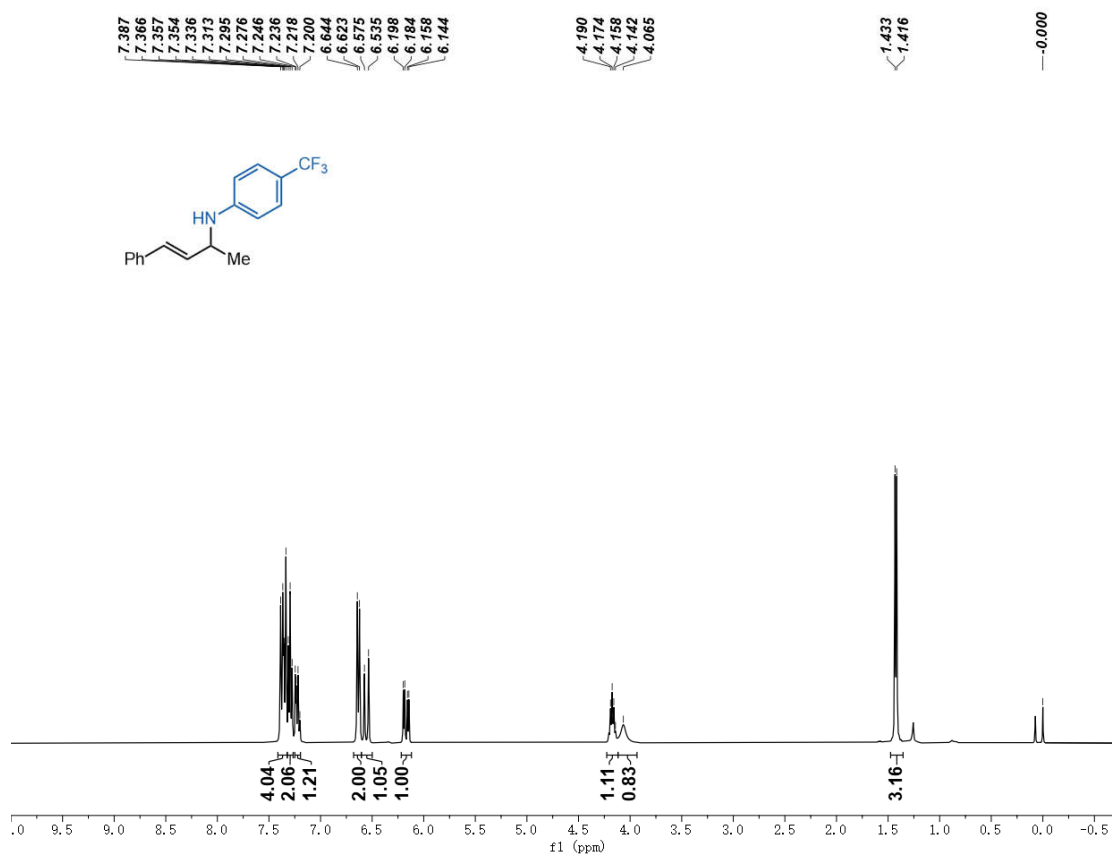

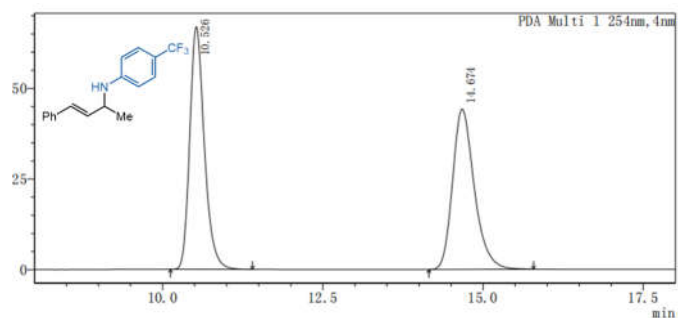

Entry Retention time Area Height Area%

PDA Ch1 254nm

| 峰号 | 保留时间   | 面积      | 高度     | 面积%     |
|----|--------|---------|--------|---------|
| 1  | 10.526 | 1061071 | 66802  | 50.443  |
| 2  | 14.674 | 1042446 | 44182  | 49.557  |
| 总计 |        | 2103517 | 110984 | 100.000 |

Total

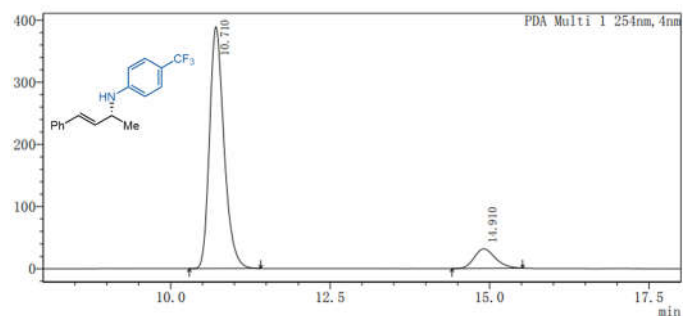

Entry Retention time Area Height Area%

PDA Ch1 254nm

| 峰号 | 保留时间   | 面积      | 高度     | 面积%     |
|----|--------|---------|--------|---------|
| 1  | 10.710 | 6159533 | 389037 | 89.439  |
| 2  | 14.910 | 727286  | 31541  | 10.561  |
| 总计 |        | 6886819 | 420578 | 100.000 |

Total

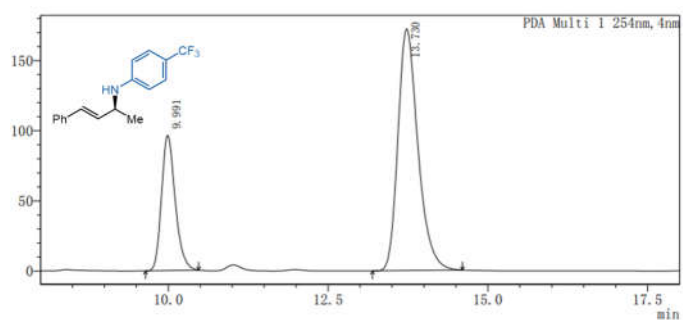

Entry Retention time Area Height Area%

PDA Ch1 254nm

| 峰号 | 保留时间   | 面积      | 高度     | 面积%     |
|----|--------|---------|--------|---------|
| 1  | 9.991  | 1441594 | 96434  | 27.748  |
| 2  | 13.730 | 3753787 | 172171 | 72.252  |
| 总计 |        | 5195381 | 268604 | 100.000 |

Total

$^1\text{H}$  NMR (400 MHz,  $\text{CDCl}_3$ ) spectrum of **3ae**

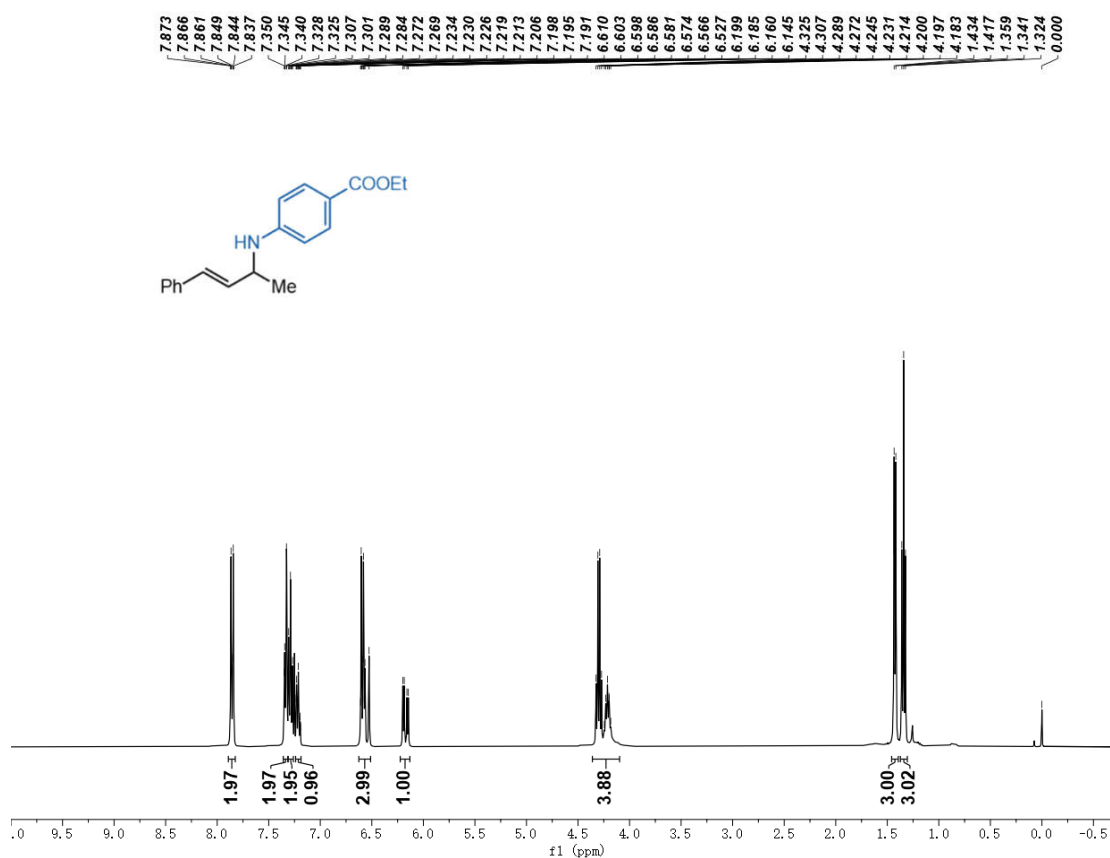

$^{13}\text{C}$  NMR (101 MHz,  $\text{CDCl}_3$ ) spectrum of **3ae**

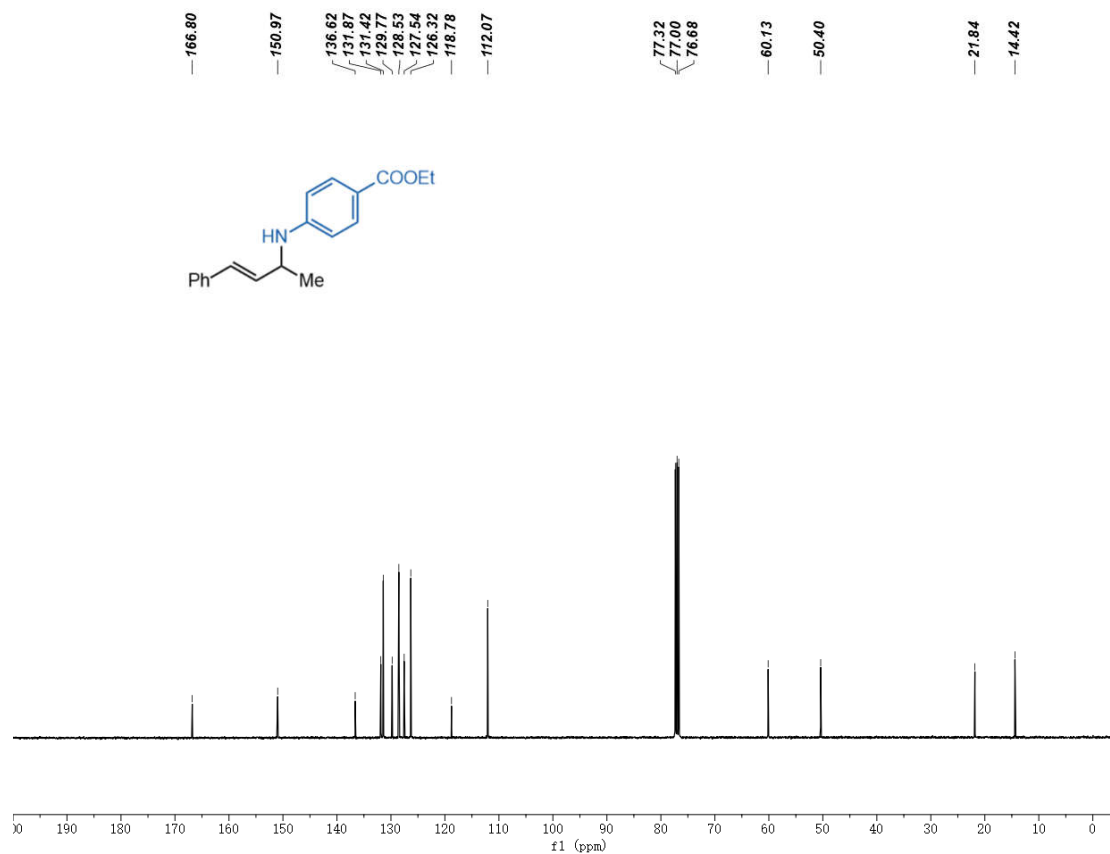

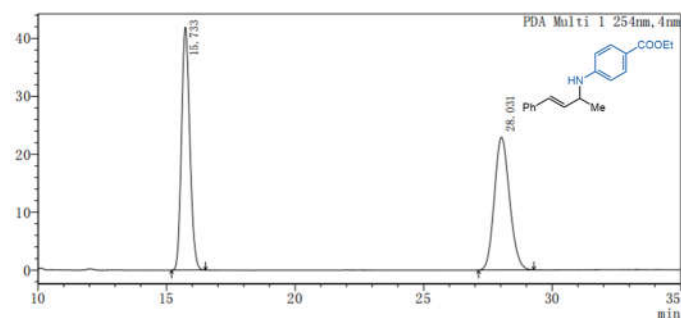

Entry Retention time Area Height Area%

PDA Ch1 254nm

| 峰号 | 保留时间   | 面积      | 高度    | 面积%     |
|----|--------|---------|-------|---------|
| 1  | 15.733 | 944295  | 41871 | 50.040  |
| 2  | 28.031 | 942791  | 22919 | 49.960  |
| 总计 |        | 1887086 | 64790 | 100.000 |

Total

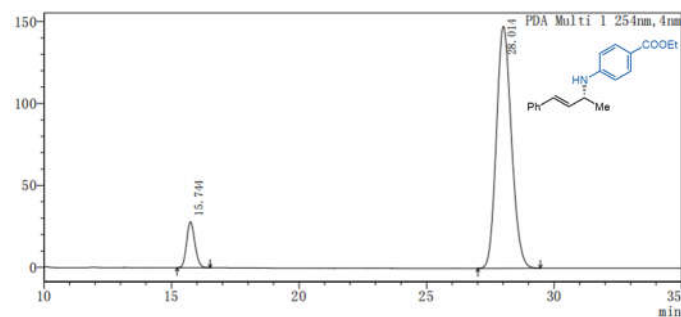

Entry Retention time Area Height Area%

PDA Ch1 254nm

| 峰号 | 保留时间   | 面积      | 高度     | 面积%     |
|----|--------|---------|--------|---------|
| 1  | 15.744 | 628663  | 27968  | 9.404   |
| 2  | 28.014 | 6056549 | 147529 | 90.596  |
| 总计 |        | 6685212 | 175497 | 100.000 |

Total

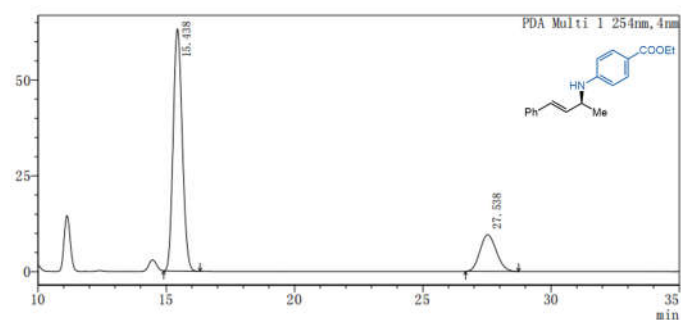

Entry Retention time Area Height Area%

PDA Ch1 254nm

| 峰号 | 保留时间   | 面积      | 高度    | 面积%     |
|----|--------|---------|-------|---------|
| 1  | 15.438 | 1557654 | 63160 | 78.627  |
| 2  | 27.538 | 423408  | 9549  | 21.373  |
| 总计 |        | 1981062 | 72709 | 100.000 |

$^1\text{H}$  NMR (400 MHz,  $\text{CDCl}_3$ ) spectrum of **3af**

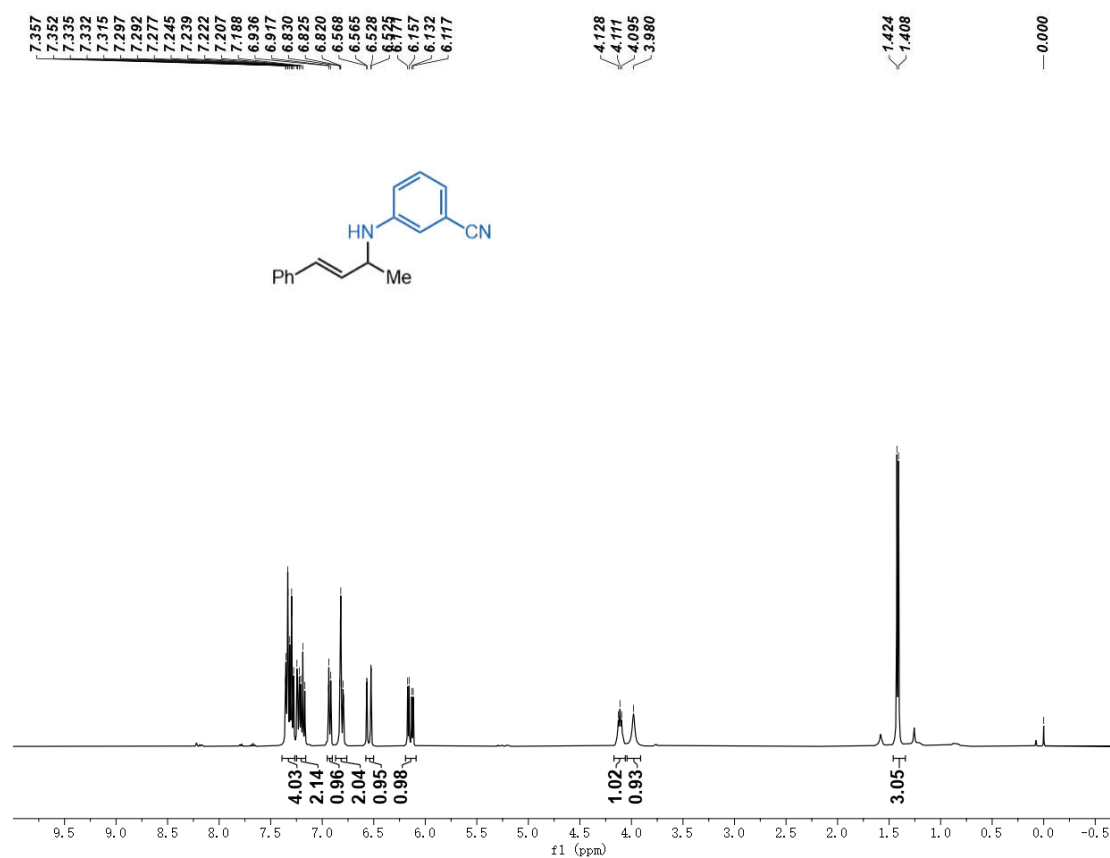

$^{13}\text{C}$  NMR (101 MHz,  $\text{CDCl}_3$ ) spectrum of **3af**

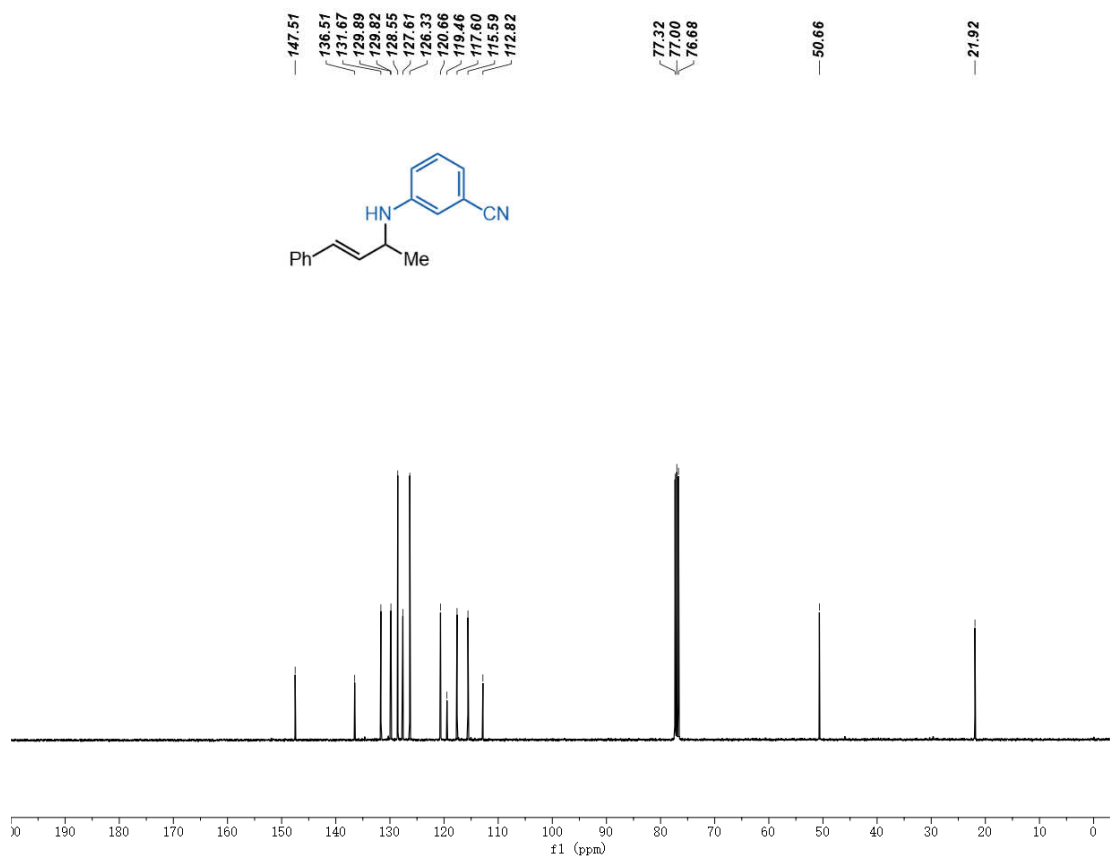

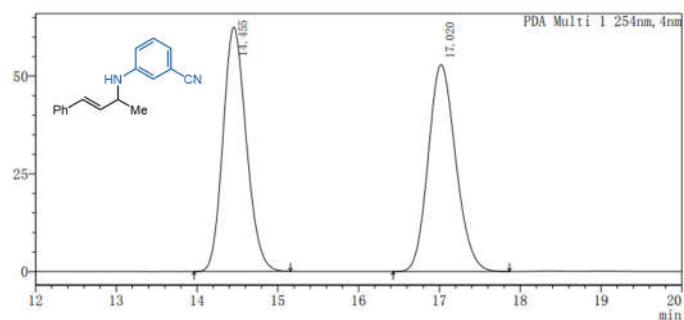

Entry Retention time Area Height Area%

PDA Ch1 254nm

| 峰号 | 保留时间   | 面积      | 高度     | 面积%     |
|----|--------|---------|--------|---------|
| 1  | 14.455 | 1258812 | 62479  | 50.042  |
| 2  | 17.020 | 1256685 | 52922  | 49.958  |
| 总计 |        | 2515498 | 115401 | 100.000 |

Total

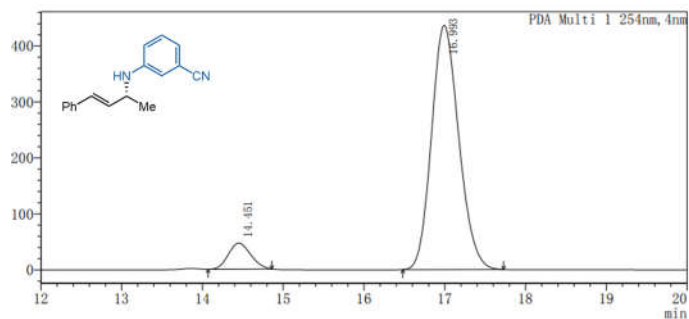

Entry Retention time Area Height Area%

PDA Ch1 254nm

| 峰号 | 保留时间   | 面积       | 高度     | 面积%     |
|----|--------|----------|--------|---------|
| 1  | 14.451 | 892521   | 46478  | 8.006   |
| 2  | 16.993 | 10255448 | 436326 | 91.994  |
| 总计 |        | 11147969 | 482804 | 100.000 |

Total

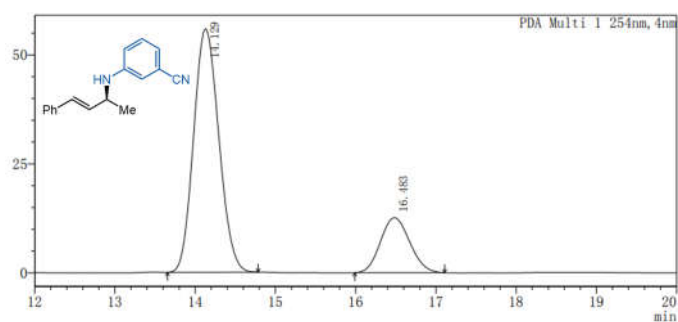

Entry Retention time Area Height Area%

PDA Ch1 254nm

| 峰号 | 保留时间   | 面积      | 高度    | 面积%     |
|----|--------|---------|-------|---------|
| 1  | 14.129 | 1221222 | 55831 | 79.236  |
| 2  | 16.483 | 320034  | 12621 | 20.764  |
| 总计 |        | 1541256 | 68452 | 100.000 |

Total



$^1\text{H}$  NMR (400 MHz,  $\text{CDCl}_3$ ) spectrum of **3ag**

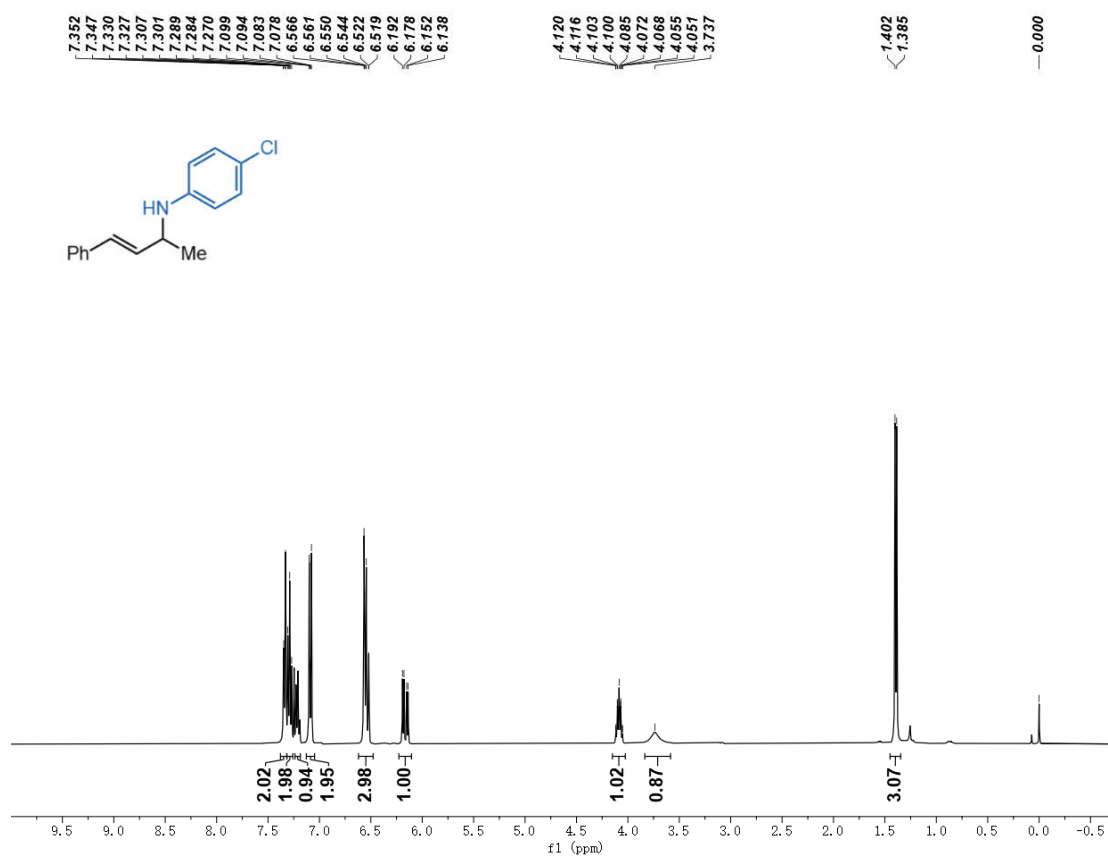

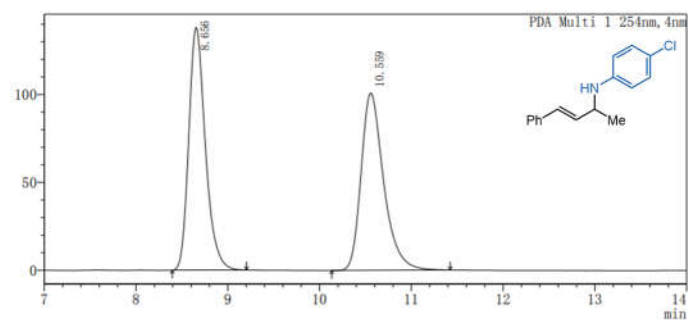

Entry Retention time Area Height Area%

PDA Ch1 254nm

| 峰号 | 保留时间   | 面积      | 高度     | 面积%     |
|----|--------|---------|--------|---------|
| 1  | 8.656  | 1737141 | 137810 | 50.168  |
| 2  | 10.559 | 1725537 | 100897 | 49.832  |
| 总计 |        | 3462678 | 238706 | 100.000 |

Total

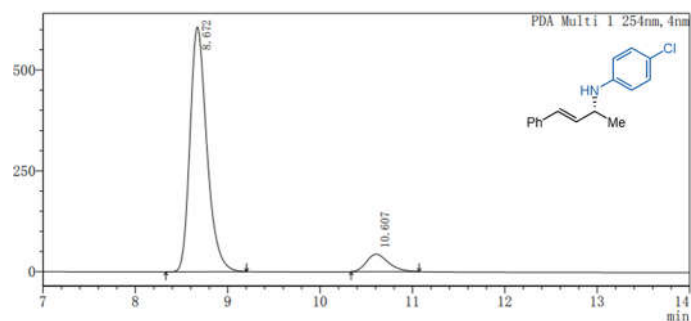

Entry Retention time Area Height Area%

PDA Ch1 254nm

| 峰号 | 保留时间   | 面积      | 高度     | 面积%     |
|----|--------|---------|--------|---------|
| 1  | 8.672  | 7714555 | 607201 | 91.450  |
| 2  | 10.607 | 721301  | 43492  | 8.550   |
| 总计 |        | 8435855 | 650693 | 100.000 |

Total

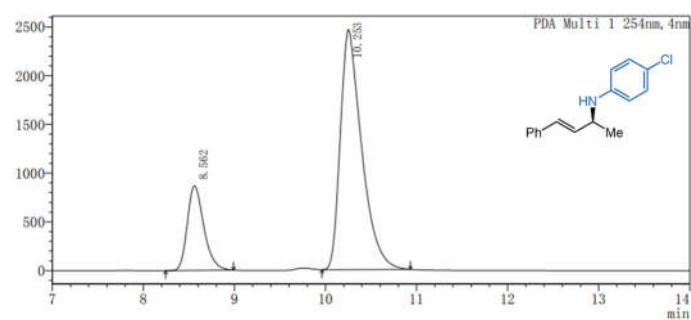

Entry Retention time Area Height Area%

PDA Ch1 254nm

| 峰号 | 保留时间   | 面积       | 高度      | 面积%     |
|----|--------|----------|---------|---------|
| 1  | 8.562  | 10945270 | 867740  | 21.423  |
| 2  | 10.253 | 40146965 | 2463907 | 78.577  |
| 总计 |        | 51092235 | 3331647 | 100.000 |

Total

$^1\text{H}$  NMR (400 MHz,  $\text{CDCl}_3$ ) spectrum of **3ah**

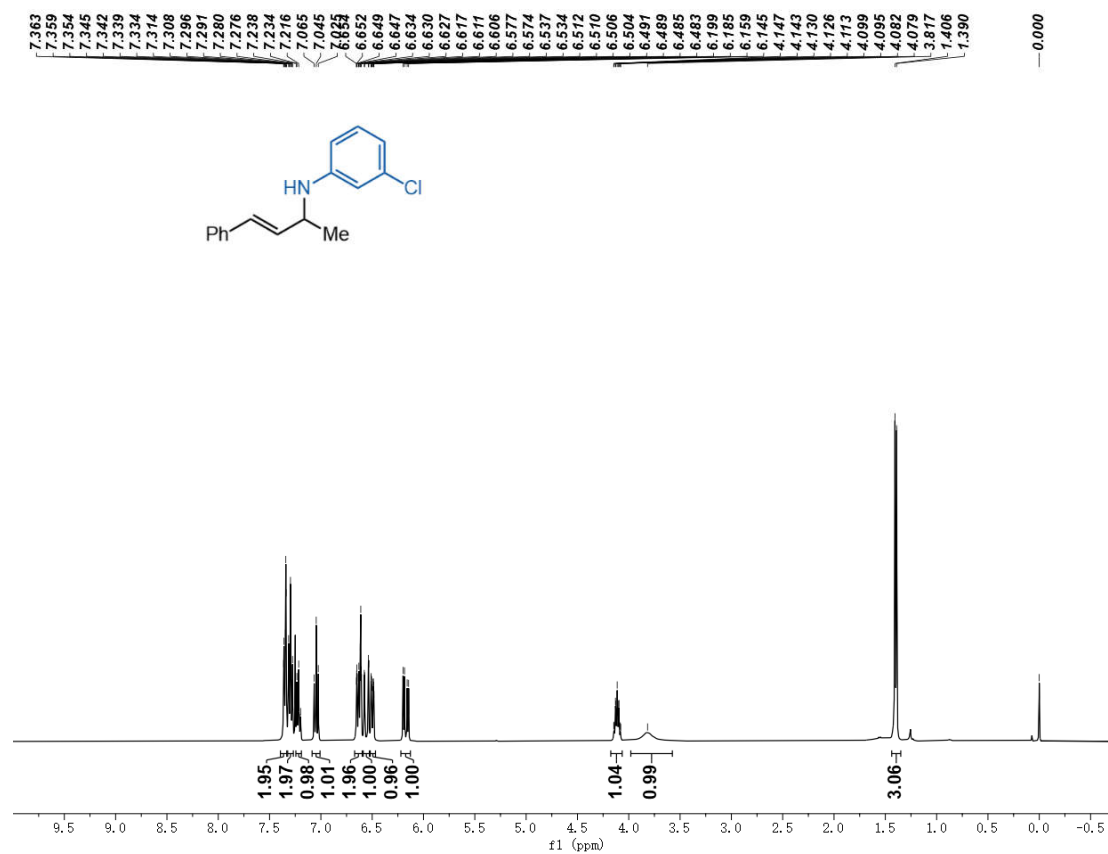

$^{13}\text{C}$  NMR (101 MHz,  $\text{CDCl}_3$ ) spectrum of **3ah**

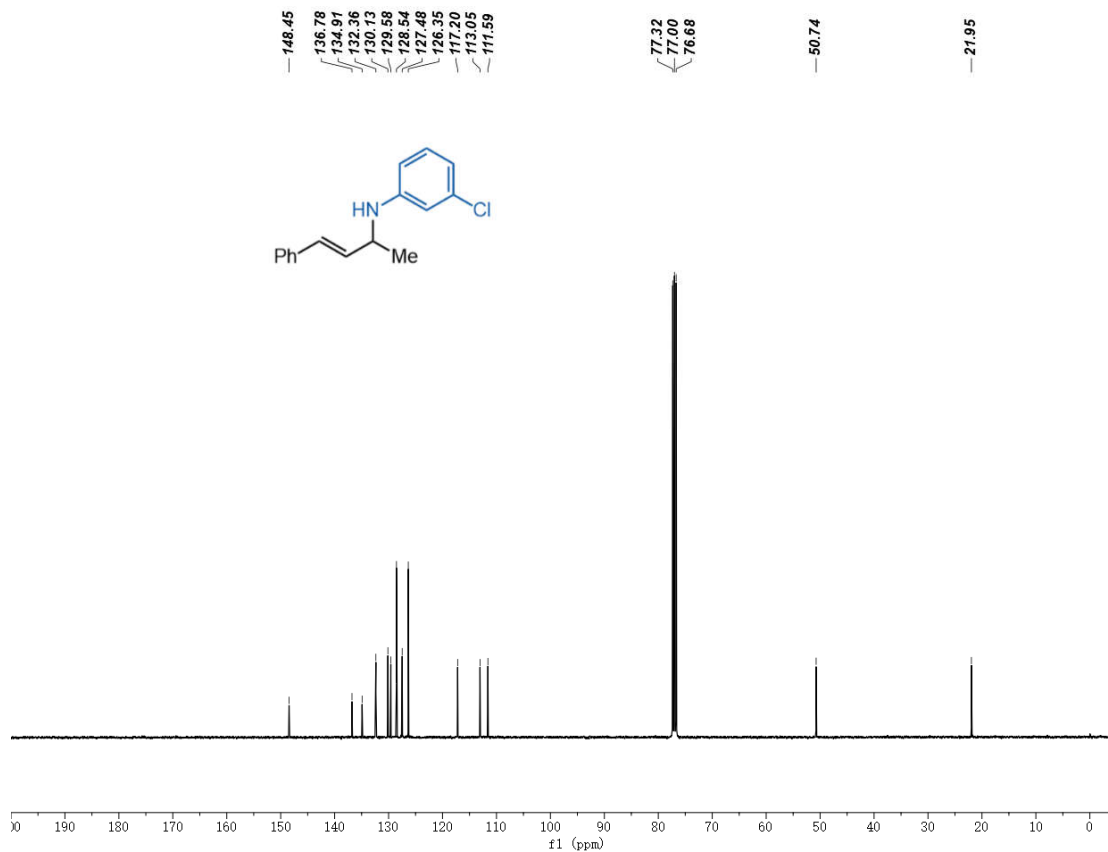

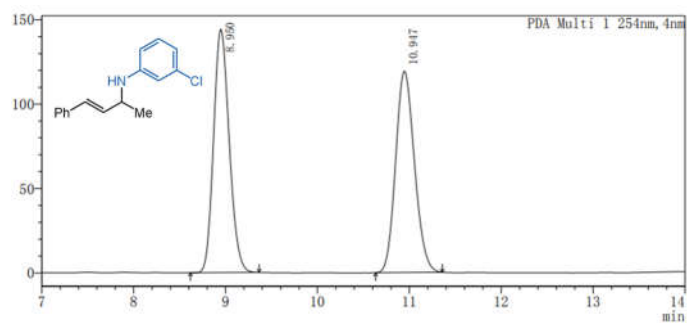

Entry Retention time Area Height Area%

PDA Ch1 254nm

| 峰号 | 保留时间   | 面积      | 高度     | 面积%     |
|----|--------|---------|--------|---------|
| 1  | 8.950  | 1704776 | 144113 | 50.071  |
| 2  | 10.947 | 1699929 | 119344 | 49.929  |
| 总计 |        | 3404705 | 263457 | 100.000 |

Total

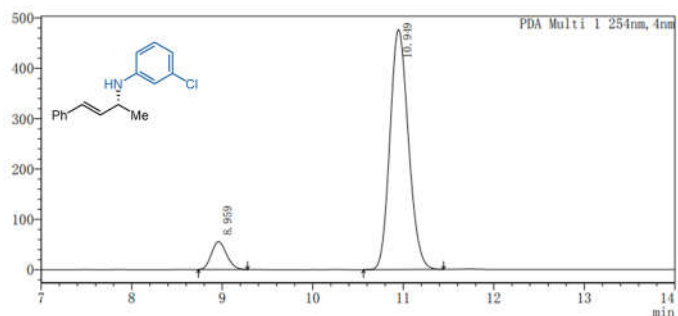

Entry Retention time Area Height Area%

PDA Ch1 254nm

| 峰号 | 保留时间   | 面积      | 高度     | 面积%     |
|----|--------|---------|--------|---------|
| 1  | 8.959  | 644329  | 55412  | 8.691   |
| 2  | 10.949 | 6769293 | 476401 | 91.309  |
| 总计 |        | 7413622 | 531814 | 100.000 |

Total

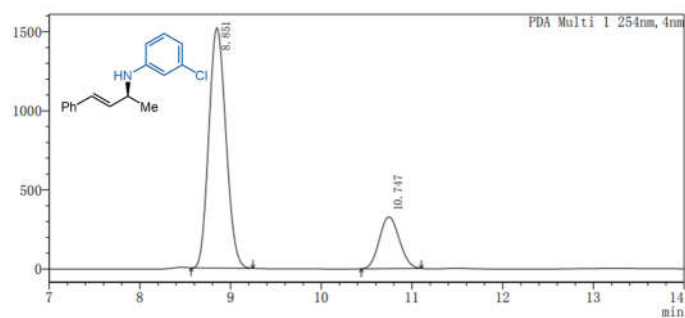

Entry Retention time Area Height Area%

PDA Ch1 254nm

| 峰号 | 保留时间   | 面积       | 高度      | 面积%     |
|----|--------|----------|---------|---------|
| 1  | 8.851  | 19979766 | 1519033 | 79.939  |
| 2  | 10.747 | 5014054  | 327476  | 20.061  |
| 总计 |        | 24993820 | 1846509 | 100.000 |

Total

<sup>1</sup>H NMR (400 MHz, CDCl<sub>3</sub>) spectrum of **3ai**

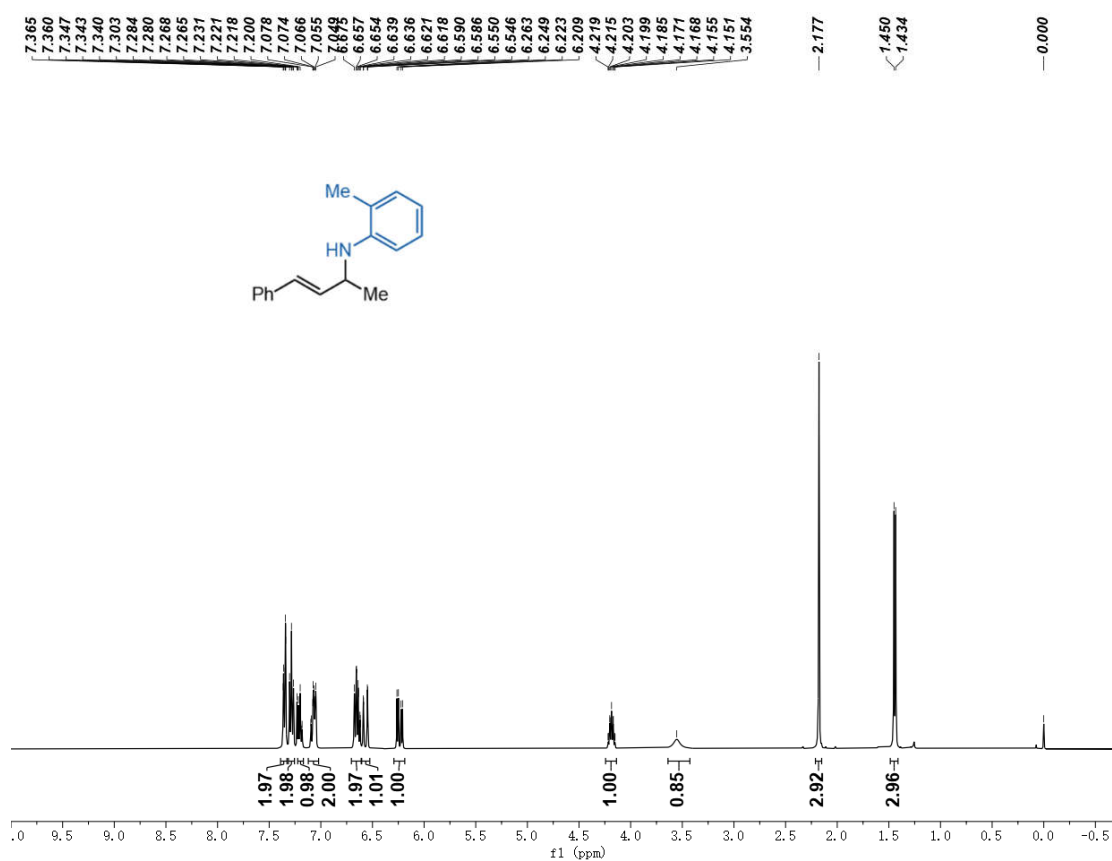

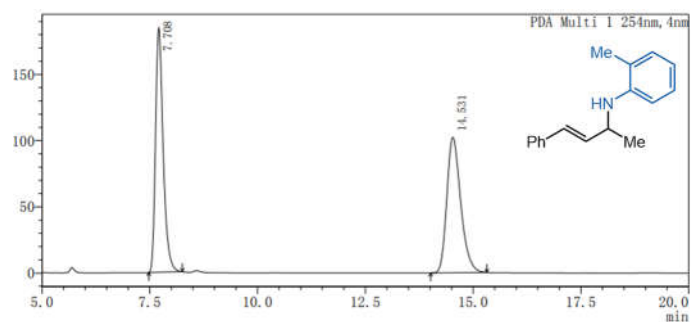

Entry Retention time Area Height Area%

PDA Ch1 254nm

| 峰号 | 保留时间   | 面积      | 高度     | 面积%     |
|----|--------|---------|--------|---------|
| 1  | 7.708  | 2279171 | 184404 | 49.826  |
| 2  | 14.531 | 2295059 | 102356 | 50.174  |
| 总计 |        | 4574230 | 286759 | 100.000 |

Total

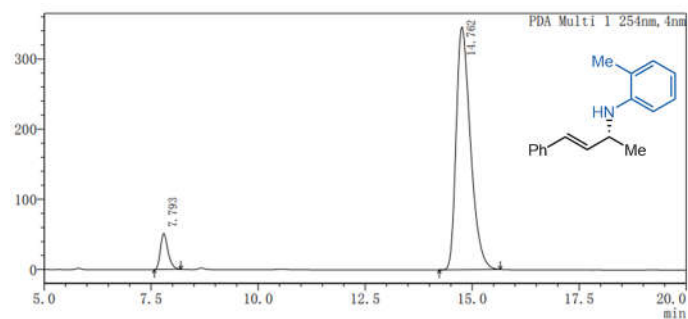

Entry Retention time Area Height Area%

PDA Ch1 254nm

| 峰号 | 保留时间   | 面积      | 高度     | 面积%     |
|----|--------|---------|--------|---------|
| 1  | 7.793  | 649691  | 51566  | 7.446   |
| 2  | 14.762 | 8075834 | 345968 | 92.554  |
| 总计 |        | 8725525 | 397534 | 100.000 |

Total

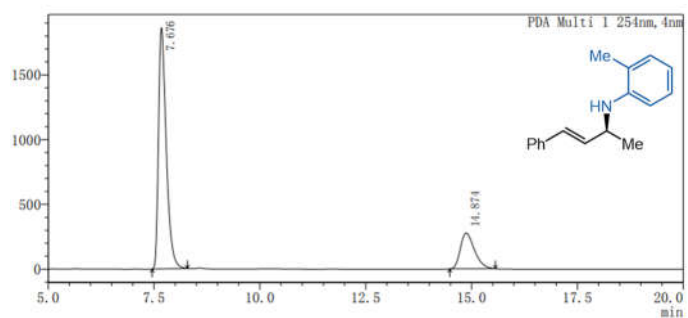

Entry Retention time Area Height Area%

PDA Ch1 254nm

| 峰号 | 保留时间   | 面积       | 高度      | 面积%     |
|----|--------|----------|---------|---------|
| 1  | 7.676  | 23658911 | 1859884 | 78.654  |
| 2  | 14.874 | 6420768  | 276659  | 21.346  |
| 总计 |        | 30079680 | 2136543 | 100.000 |

Total

$^1\text{H}$  NMR (400 MHz,  $\text{CDCl}_3$ ) spectrum of **3aj**

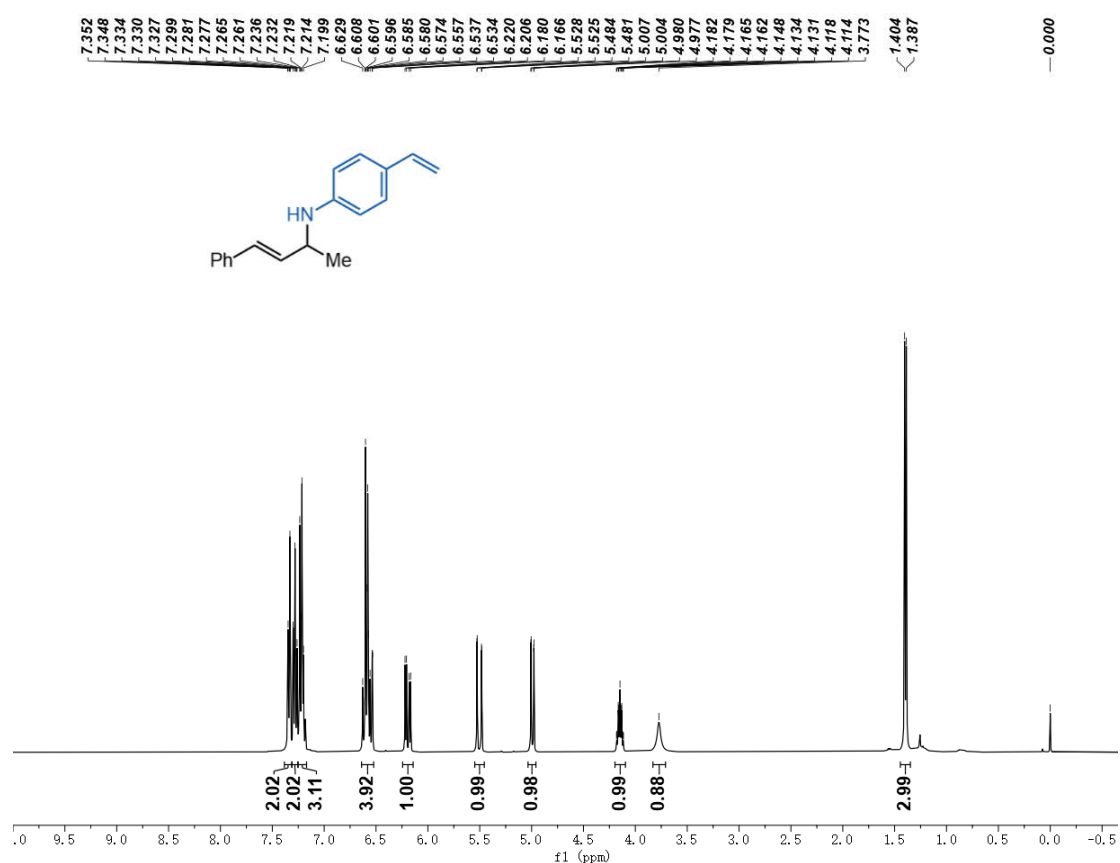

$^{13}\text{C}$  NMR (101 MHz,  $\text{CDCl}_3$ ) spectrum of **3aj**

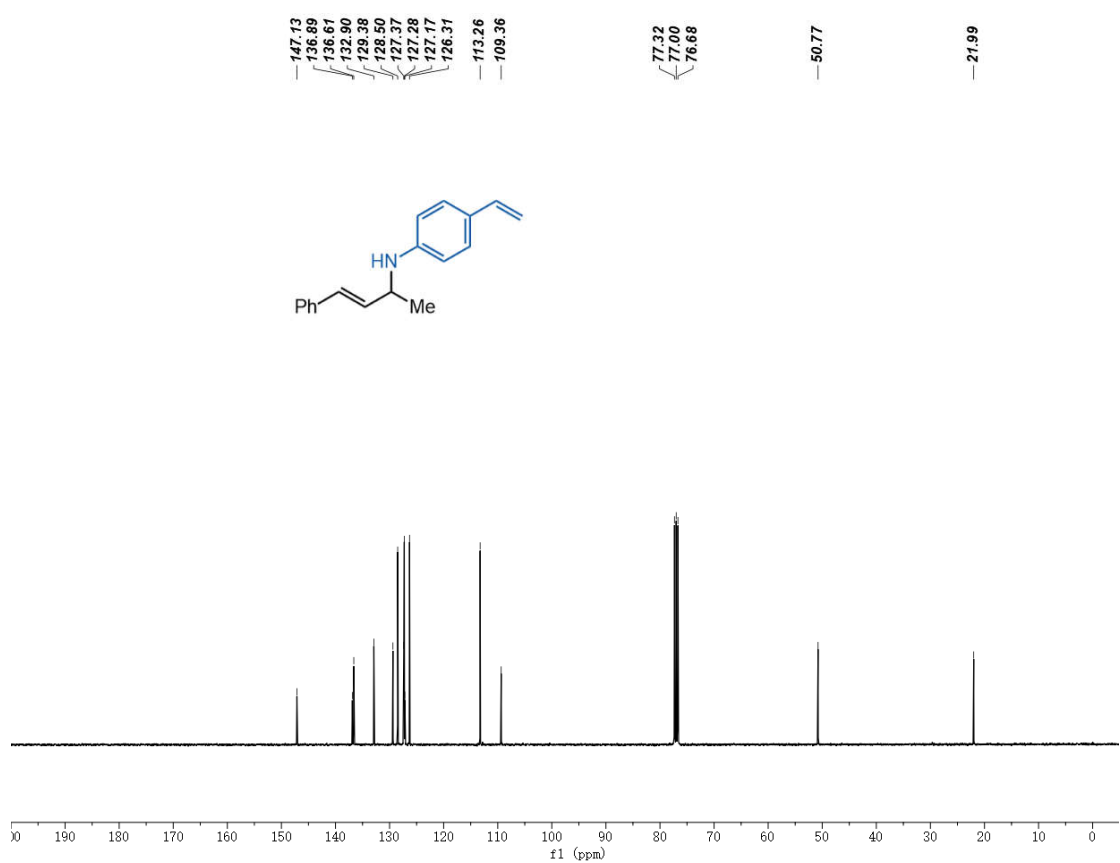

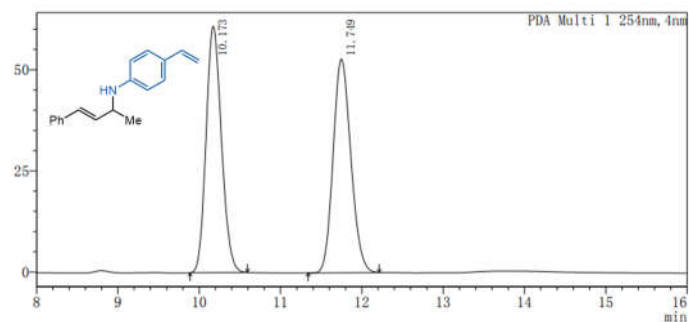

Entry Retention time Area Height Area%

PDA Ch1 254nm

| 峰号 | 保留时间   | 面积      | 高度     | 面积%     |
|----|--------|---------|--------|---------|
| 1  | 10.173 | 803265  | 60930  | 49.977  |
| 2  | 11.749 | 804014  | 52835  | 50.023  |
| 总计 |        | 1607279 | 113765 | 100.000 |

Total

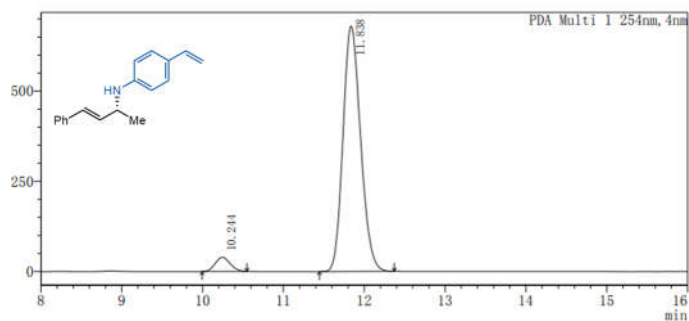

Entry Retention time Area Height Area%

PDA Ch1 254nm

| 峰号 | 保留时间   | 面积       | 高度     | 面积%     |
|----|--------|----------|--------|---------|
| 1  | 10.244 | 505448   | 39179  | 4.676   |
| 2  | 11.838 | 10303432 | 680014 | 95.324  |
| 总计 |        | 10808879 | 719193 | 100.000 |

Total

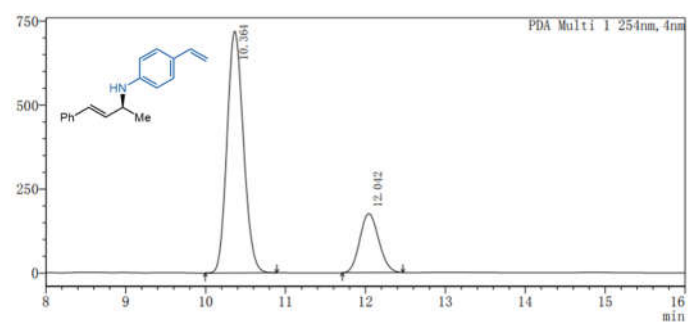

Entry Retention time Area Height Area%

PDA Ch1 254nm

| 峰号 | 保留时间   | 面积       | 高度     | 面积%     |
|----|--------|----------|--------|---------|
| 1  | 10.364 | 10297639 | 719175 | 77.988  |
| 2  | 12.042 | 2906501  | 176129 | 22.012  |
| 总计 |        | 13204140 | 895305 | 100.000 |

Total



$^1\text{H}$  NMR (400 MHz,  $\text{CDCl}_3$ ) spectrum of **3ak**

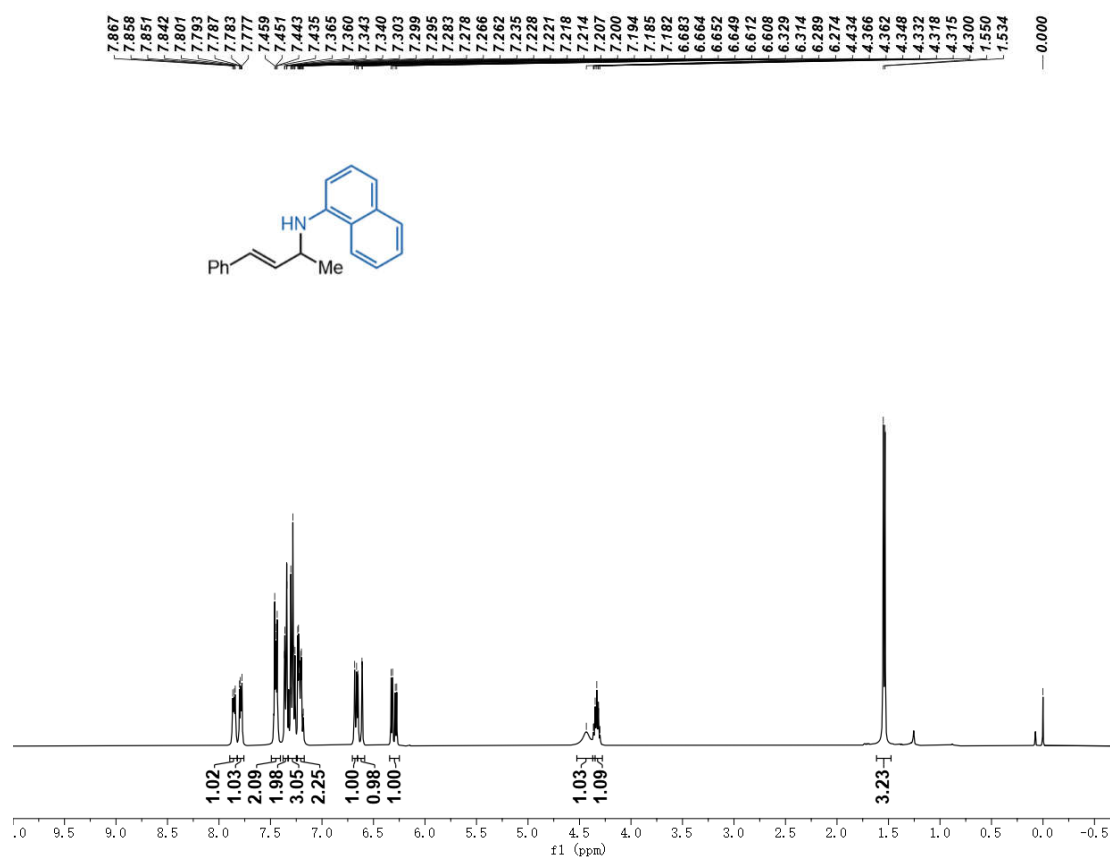

$^{13}\text{C}$  NMR (101 MHz,  $\text{CDCl}_3$ ) spectrum of **3ak**

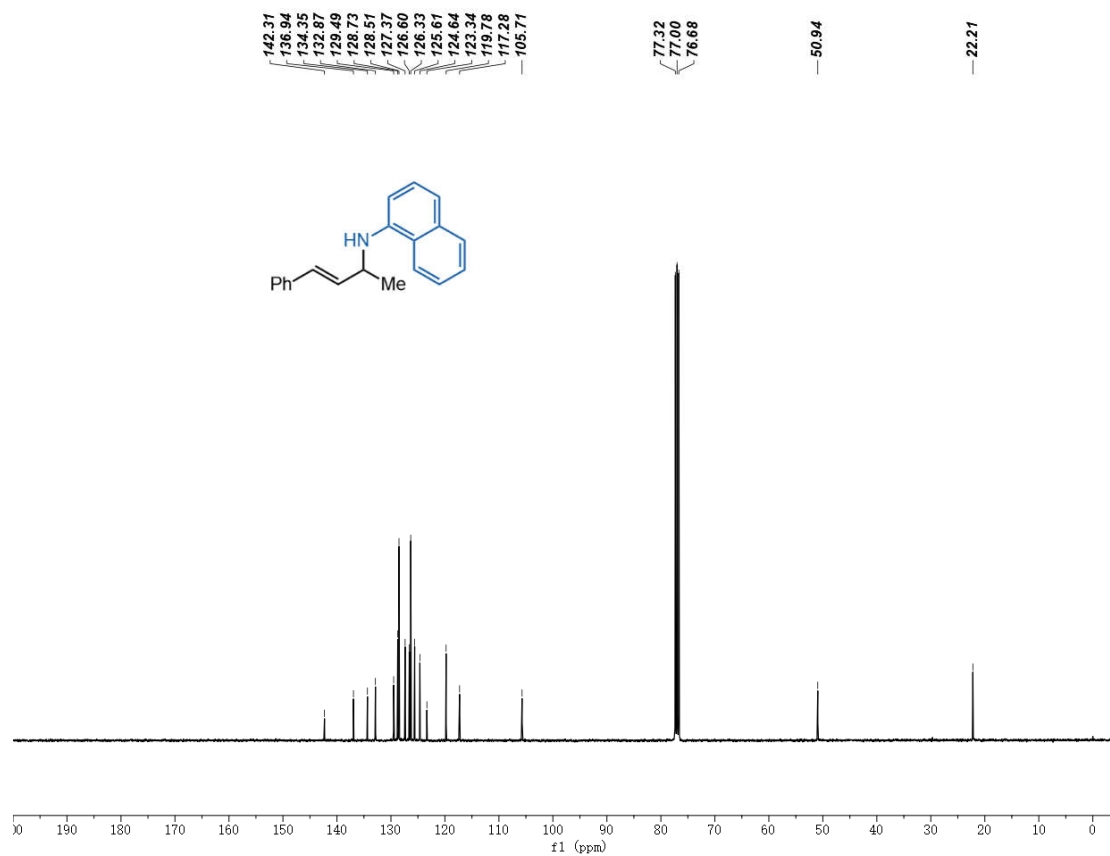

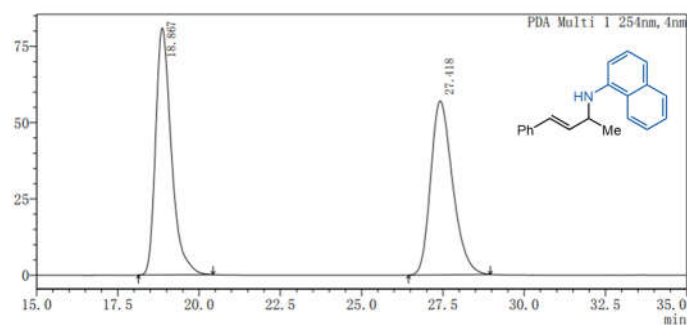

Entry Retention time Area Height Area%

PDA Ch1 254nm

| 峰号 | 保留时间   | 面积      | 高度     | 面积%     |
|----|--------|---------|--------|---------|
| 1  | 18.867 | 2732894 | 80897  | 50.424  |
| 2  | 27.418 | 2686943 | 56960  | 49.576  |
| 总计 |        | 5419838 | 137857 | 100.000 |

Total

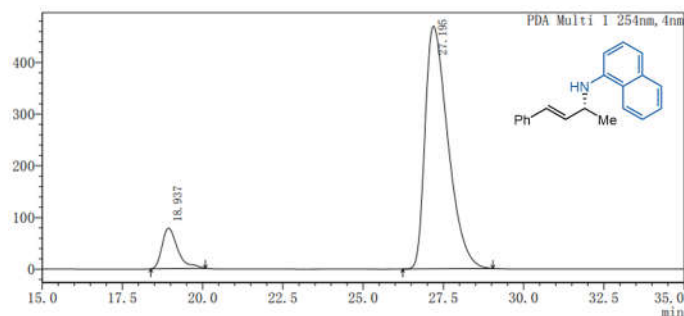

Entry Retention time Area Height Area%

PDA Ch1 254nm

| 峰号 | 保留时间   | 面积       | 高度     | 面积%     |
|----|--------|----------|--------|---------|
| 1  | 18.937 | 2657623  | 78365  | 10.224  |
| 2  | 27.195 | 23335447 | 469553 | 89.776  |
| 总计 |        | 25993070 | 547917 | 100.000 |

Total

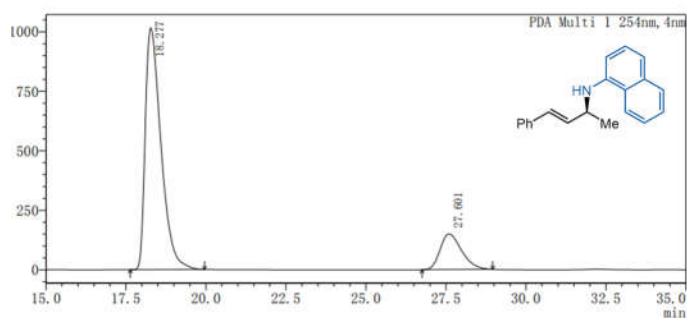

Entry Retention time Area Height Area%

PDA Ch1 254nm

| 峰号 | 保留时间   | 面积       | 高度      | 面积%     |
|----|--------|----------|---------|---------|
| 1  | 18.277 | 34719368 | 1014984 | 83.201  |
| 2  | 27.601 | 7009930  | 149639  | 16.799  |
| 总计 |        | 41729299 | 1164623 | 100.000 |

Total

$^1\text{H}$  NMR (400 MHz,  $\text{CDCl}_3$ ) spectrum of **3al**

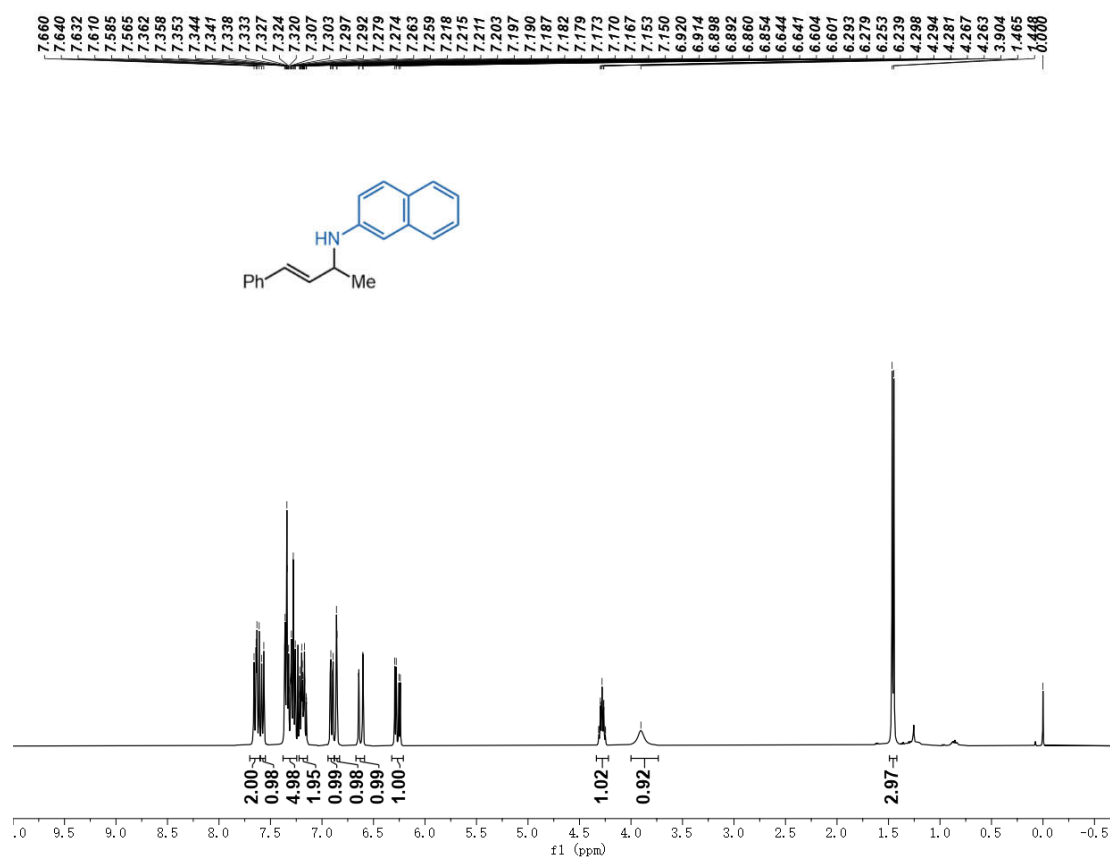

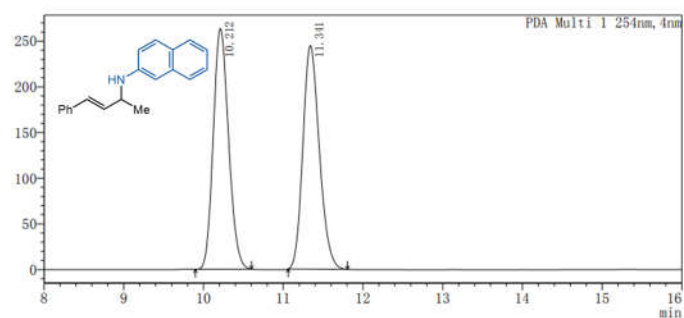

Entry Retention time Area Height Area%

PDA Ch1 254nm

| 峰号 | 保留时间   | 面积      | 高度     | 面积%     |
|----|--------|---------|--------|---------|
| 1  | 10.212 | 3511912 | 263338 | 49.970  |
| 2  | 11.341 | 3516147 | 244729 | 50.030  |
| 总计 |        | 7028059 | 508067 | 100.000 |

Total

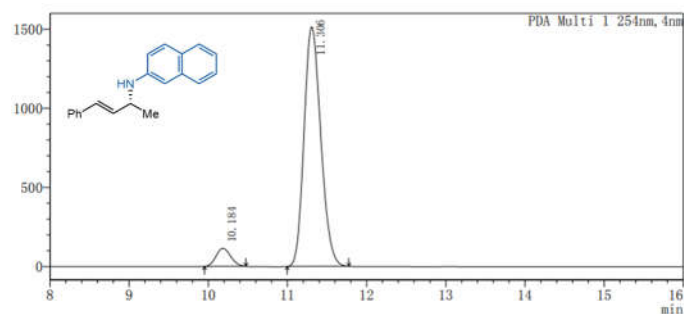

Entry Retention time Area Height Area%

PDA Ch1 254nm

| 峰号 | 保留时间   | 面积       | 高度      | 面积%     |
|----|--------|----------|---------|---------|
| 1  | 10.184 | 1470287  | 114609  | 6.187   |
| 2  | 11.306 | 22292540 | 1514055 | 93.813  |
| 总计 |        | 23762827 | 1628664 | 100.000 |

Total

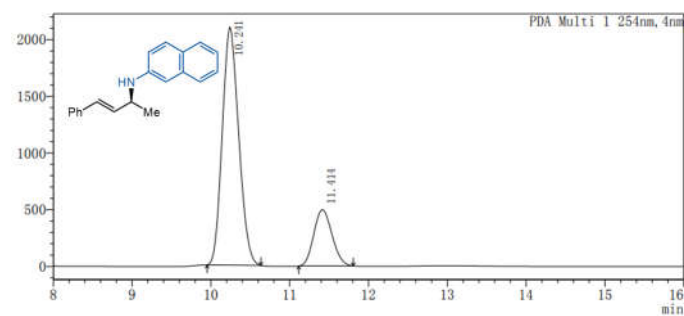

Entry Retention time Area Height Area%

PDA Ch1 254nm

| 峰号 | 保留时间   | 面积       | 高度      | 面积%     |
|----|--------|----------|---------|---------|
| 1  | 10.241 | 30421833 | 2098326 | 79.196  |
| 2  | 11.414 | 7991439  | 496651  | 20.804  |
| 总计 |        | 38413272 | 2594977 | 100.000 |

Total

$^1\text{H}$  NMR (400 MHz,  $\text{CDCl}_3$ ) spectrum of **3am**

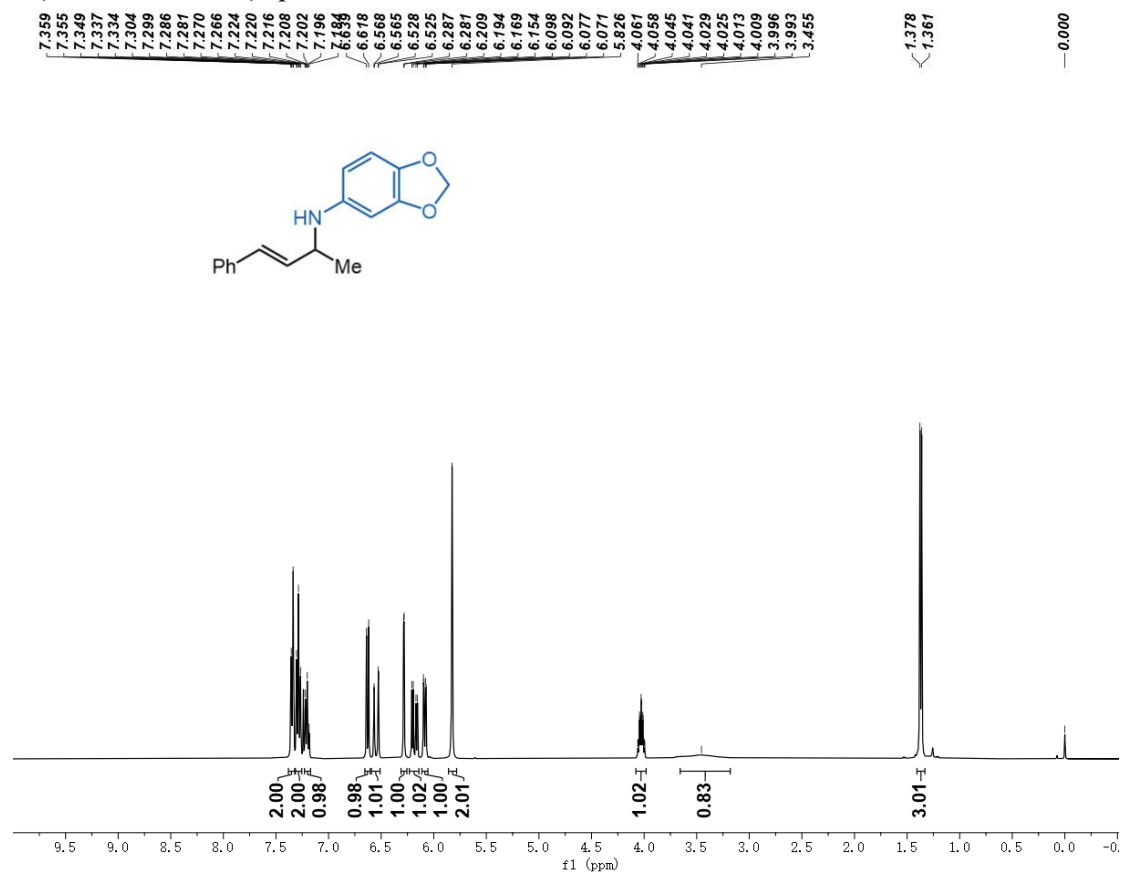

$^{13}\text{C}$  NMR (101 MHz,  $\text{CDCl}_3$ ) spectrum of **3am**

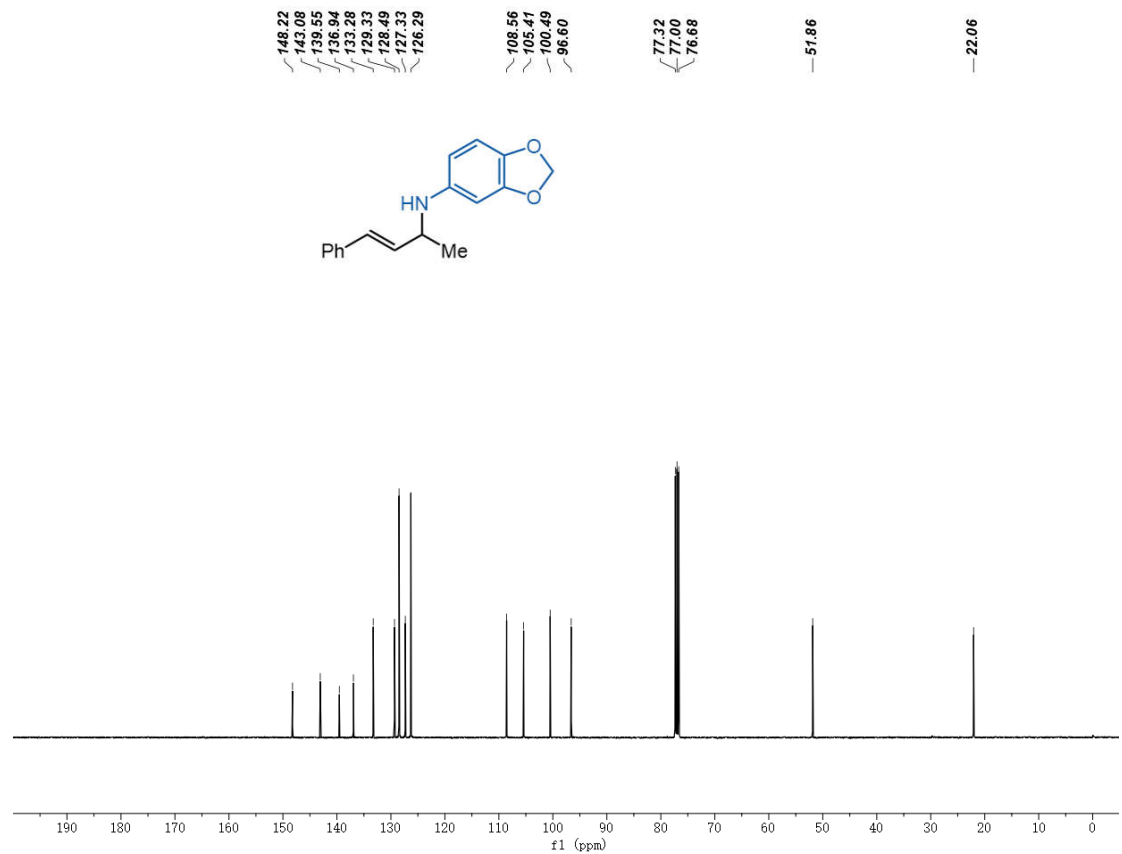

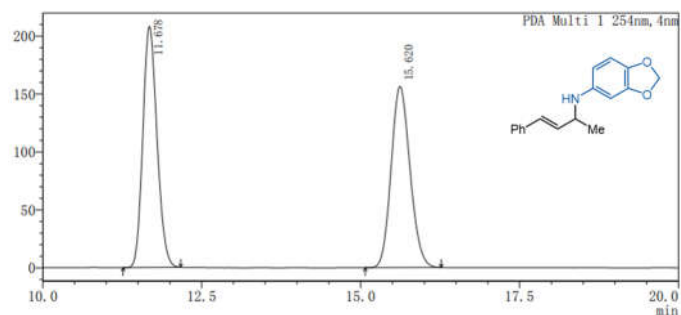

Entry Retention time Area Height Area%

PDA Ch1 254nm

| 峰号 | 保留时间   | 面积      | 高度     | 面积%     |
|----|--------|---------|--------|---------|
| 1  | 11.678 | 3229408 | 207923 | 49.986  |
| 2  | 15.620 | 3231261 | 156204 | 50.014  |
| 总计 |        | 6460668 | 364127 | 100.000 |

Total

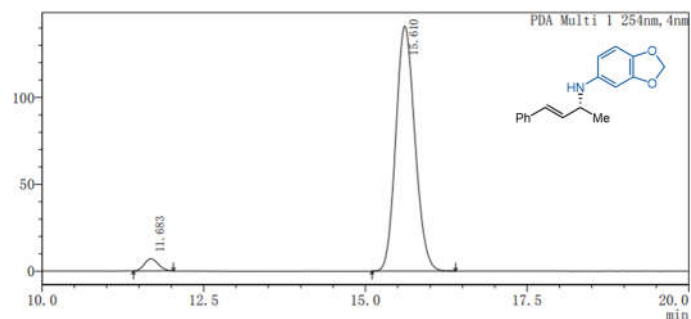

Entry Retention time Area Height Area%

PDA Ch1 254nm

| 峰号 | 保留时间   | 面积      | 高度     | 面积%     |
|----|--------|---------|--------|---------|
| 1  | 11.683 | 107275  | 7084   | 3.569   |
| 2  | 15.610 | 2898864 | 140870 | 96.431  |
| 总计 |        | 3006139 | 147954 | 100.000 |

Total

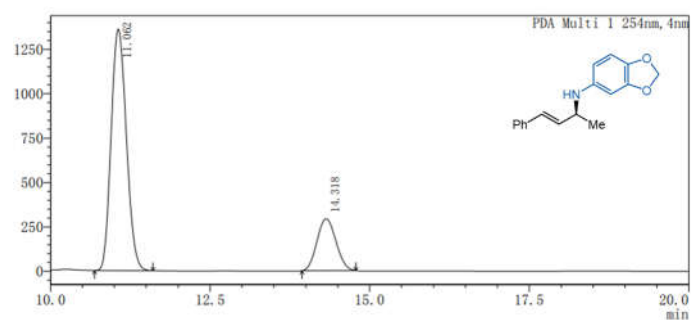

Entry Retention time Area Height Area%

PDA Ch1 254nm

| 峰号 | 保留时间   | 面积       | 高度      | 面积%     |
|----|--------|----------|---------|---------|
| 1  | 11.062 | 22604830 | 1360330 | 78.902  |
| 2  | 14.318 | 6044444  | 292812  | 21.098  |
| 总计 |        | 28649274 | 1653142 | 100.000 |

Total

$^1\text{H}$  NMR (400 MHz,  $\text{CDCl}_3$ ) spectrum of **3an**

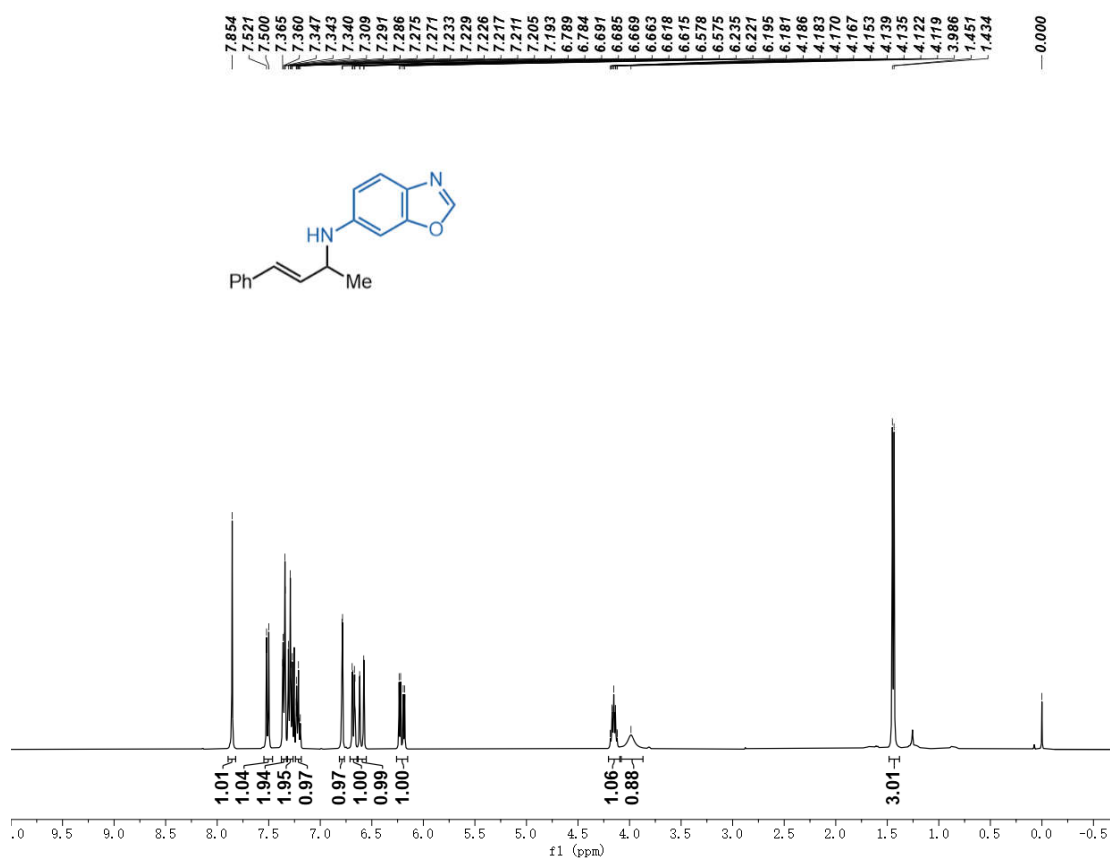

$^{13}\text{C}$  NMR (101 MHz,  $\text{CDCl}_3$ ) spectrum of **3an**

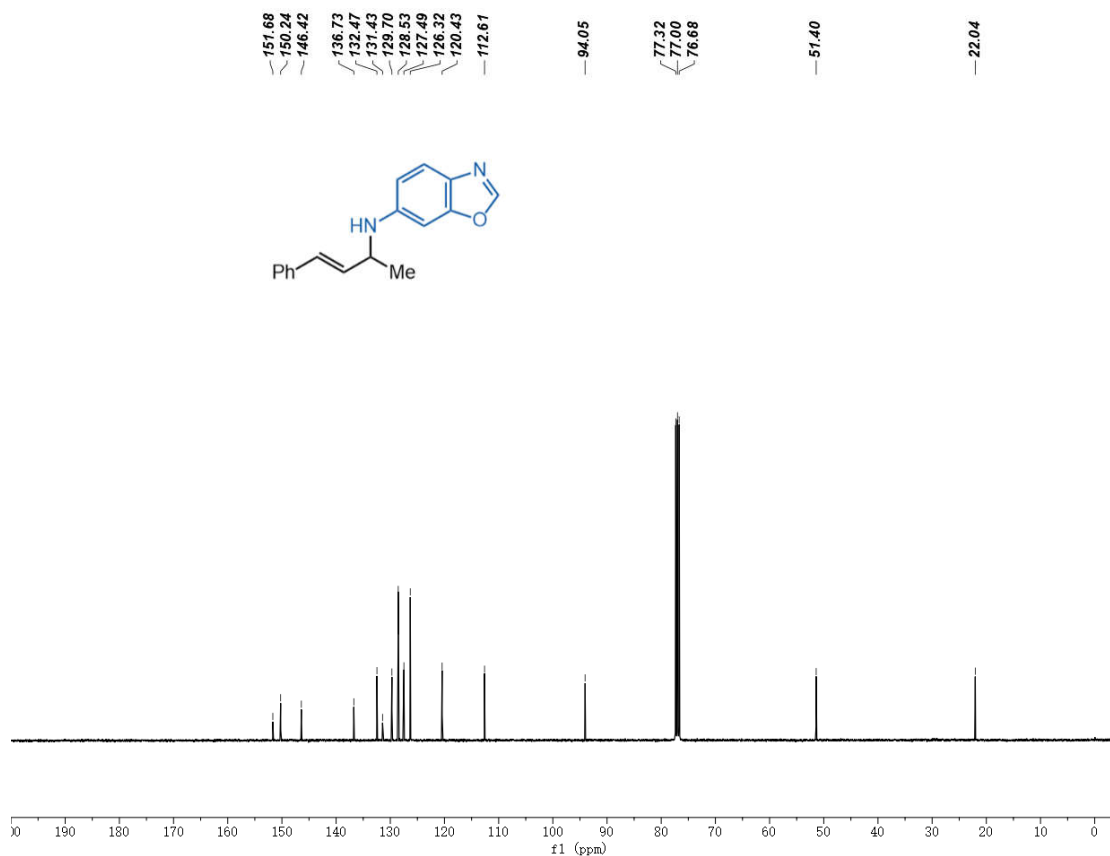

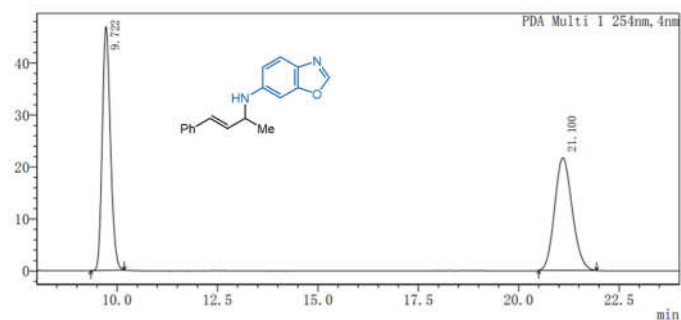

Entry Retention time Area Height Area%

PDA Ch1 254nm

| 峰号 | 保留时间   | 面积      | 高度    | 面积%     |
|----|--------|---------|-------|---------|
| 1  | 9.722  | 662286  | 46823 | 50.105  |
| 2  | 21.100 | 659500  | 21655 | 49.895  |
| 总计 |        | 1321786 | 68479 | 100.000 |

Total

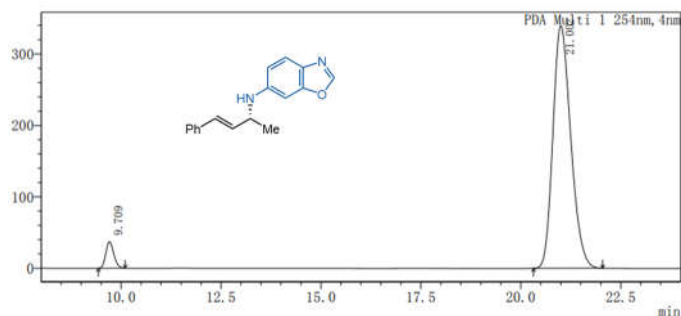

Entry Retention time Area Height Area%

PDA Ch1 254nm

| 峰号 | 保留时间   | 面积       | 高度     | 面积%     |
|----|--------|----------|--------|---------|
| 1  | 9.709  | 518941   | 37277  | 4.682   |
| 2  | 21.002 | 10565866 | 339522 | 95.318  |
| 总计 |        | 11084806 | 376799 | 100.000 |

Total

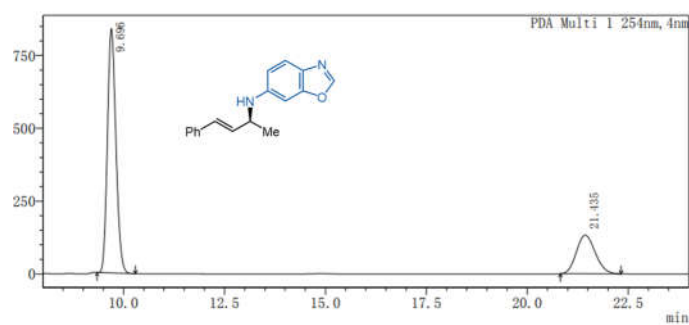

Entry Retention time Area Height Area%

PDA Ch1 254nm

| 峰号 | 保留时间   | 面积       | 高度     | 面积%     |
|----|--------|----------|--------|---------|
| 1  | 9.696  | 12264470 | 836761 | 73.953  |
| 2  | 21.435 | 4319613  | 132600 | 26.047  |
| 总计 |        | 16584083 | 969361 | 100.000 |

Total



$^1\text{H}$  NMR (400 MHz,  $\text{CDCl}_3$ ) spectrum of **3ao**

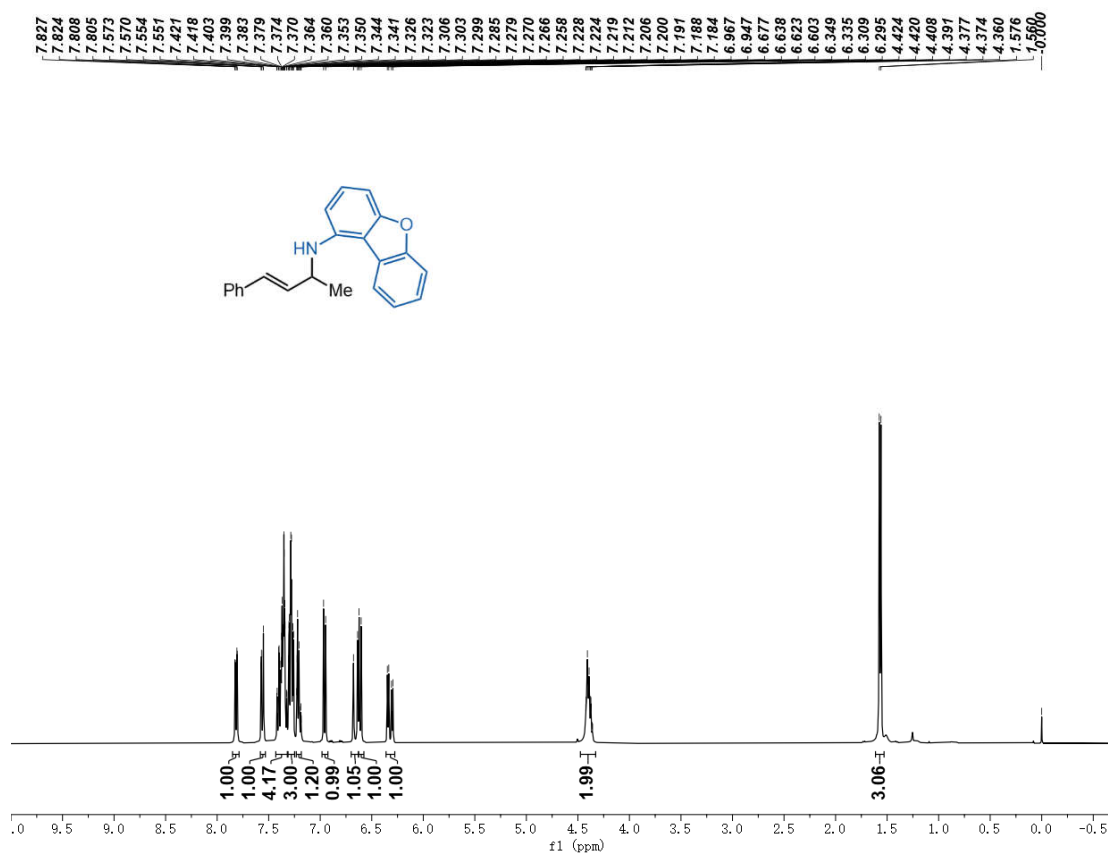

$^{13}\text{C}$  NMR (101 MHz,  $\text{CDCl}_3$ ) spectrum of **3ao**

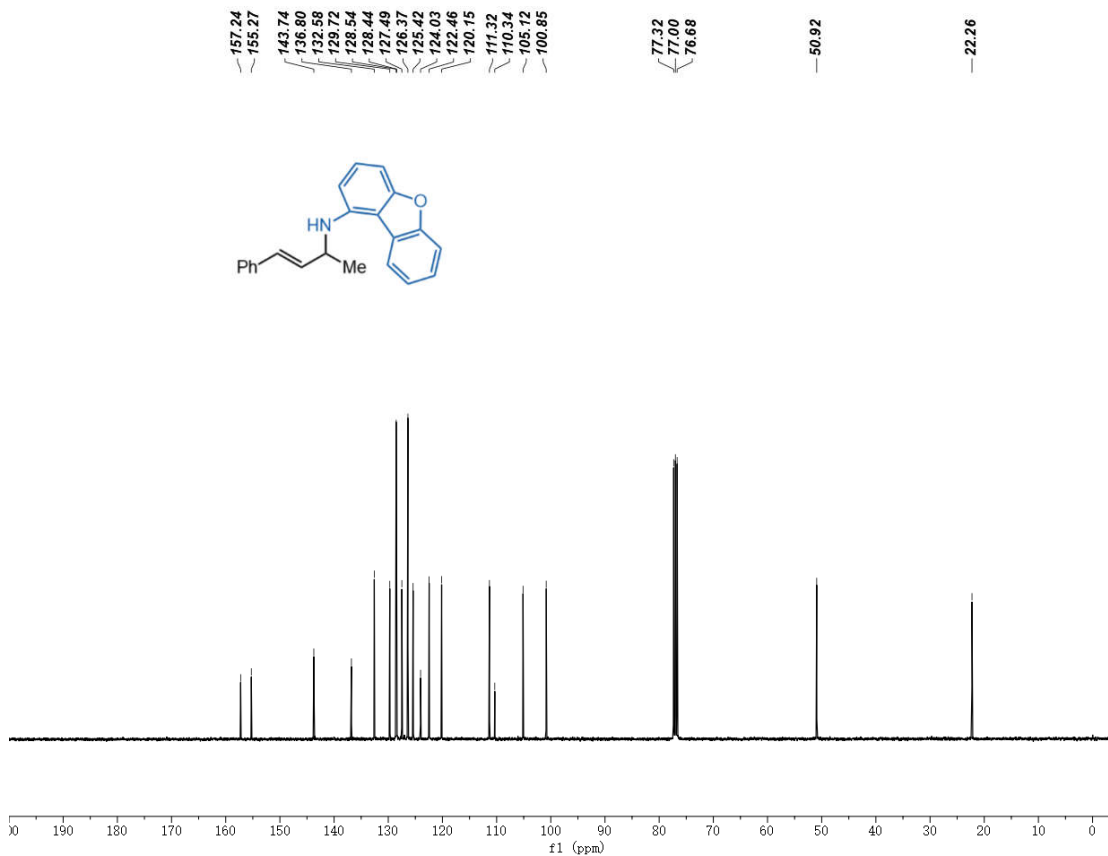

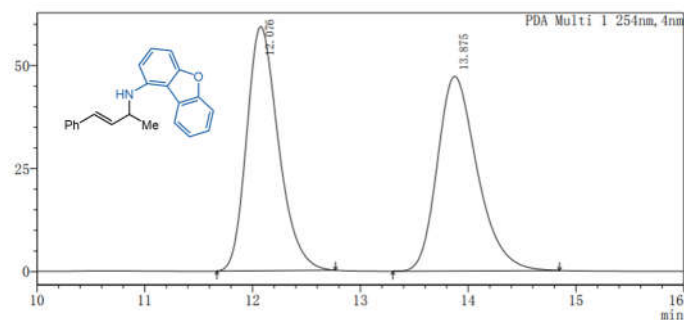

Entry Retention time Area Height Area%

PDA Ch1 254nm

| 峰号 | 保留时间   | 面积      | 高度     | 面积%     |
|----|--------|---------|--------|---------|
| 1  | 12.076 | 1217249 | 59262  | 50.002  |
| 2  | 13.875 | 1217158 | 47205  | 49.998  |
| 总计 |        | 2434407 | 106468 | 100.000 |

Total

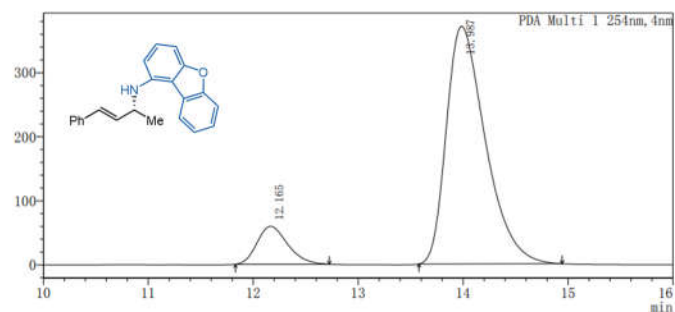

Entry Retention time Area Height Area%

PDA Ch1 254nm

| 峰号 | 保留时间   | 面积       | 高度     | 面积%     |
|----|--------|----------|--------|---------|
| 1  | 12.165 | 1201276  | 59282  | 11.123  |
| 2  | 13.987 | 9598312  | 370898 | 88.877  |
| 总计 |        | 10799588 | 430180 | 100.000 |

Total

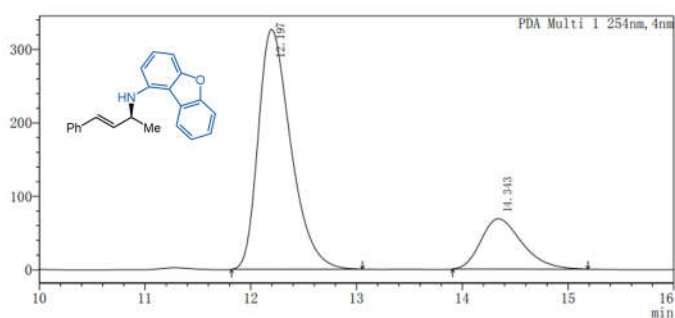

Entry Retention time Area Height Area%

PDA Ch1 254nm

| 峰号 | 保留时间   | 面积      | 高度     | 面积%     |
|----|--------|---------|--------|---------|
| 1  | 12.197 | 6990913 | 326574 | 79.032  |
| 2  | 14.343 | 1854721 | 68500  | 20.968  |
| 总计 |        | 8845634 | 395074 | 100.000 |

Total

<sup>1</sup>H NMR (400 MHz, CDCl<sub>3</sub>) spectrum of **3ap**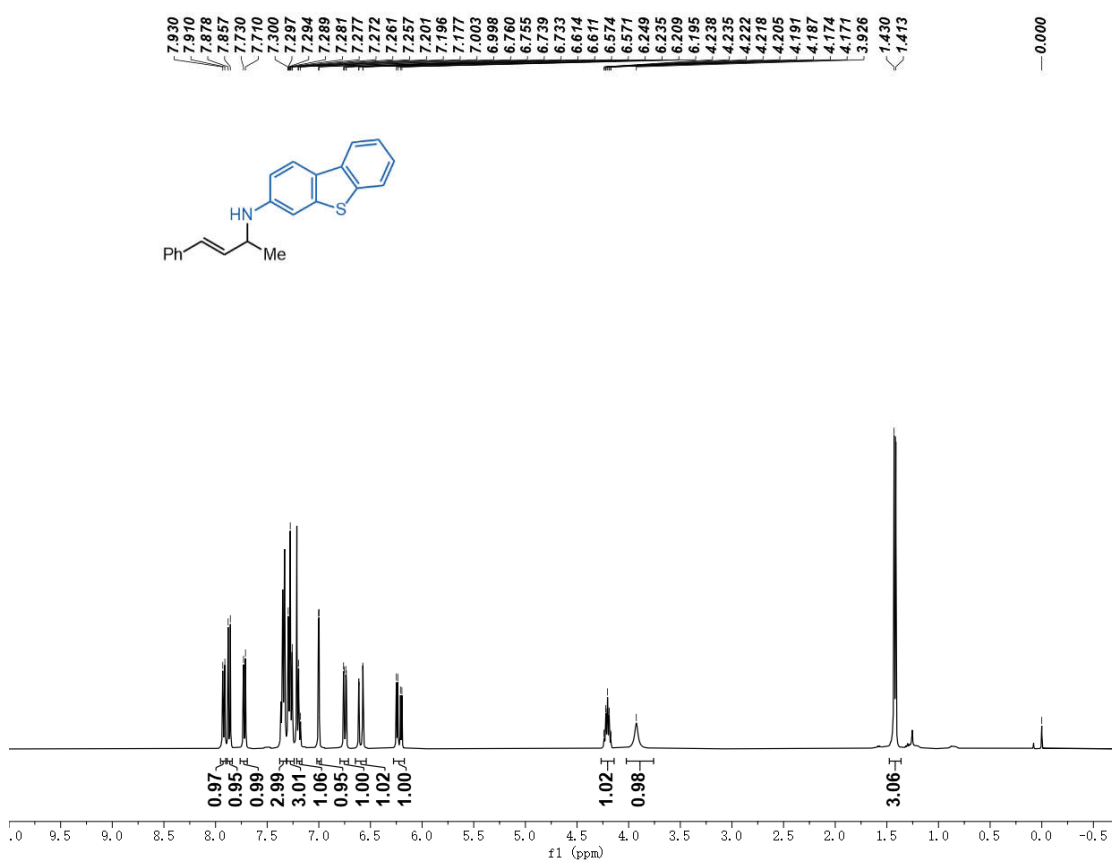 $^{13}\text{C}$  NMR (101 MHz,  $\text{CDCl}_3$ ) spectrum of **3ap**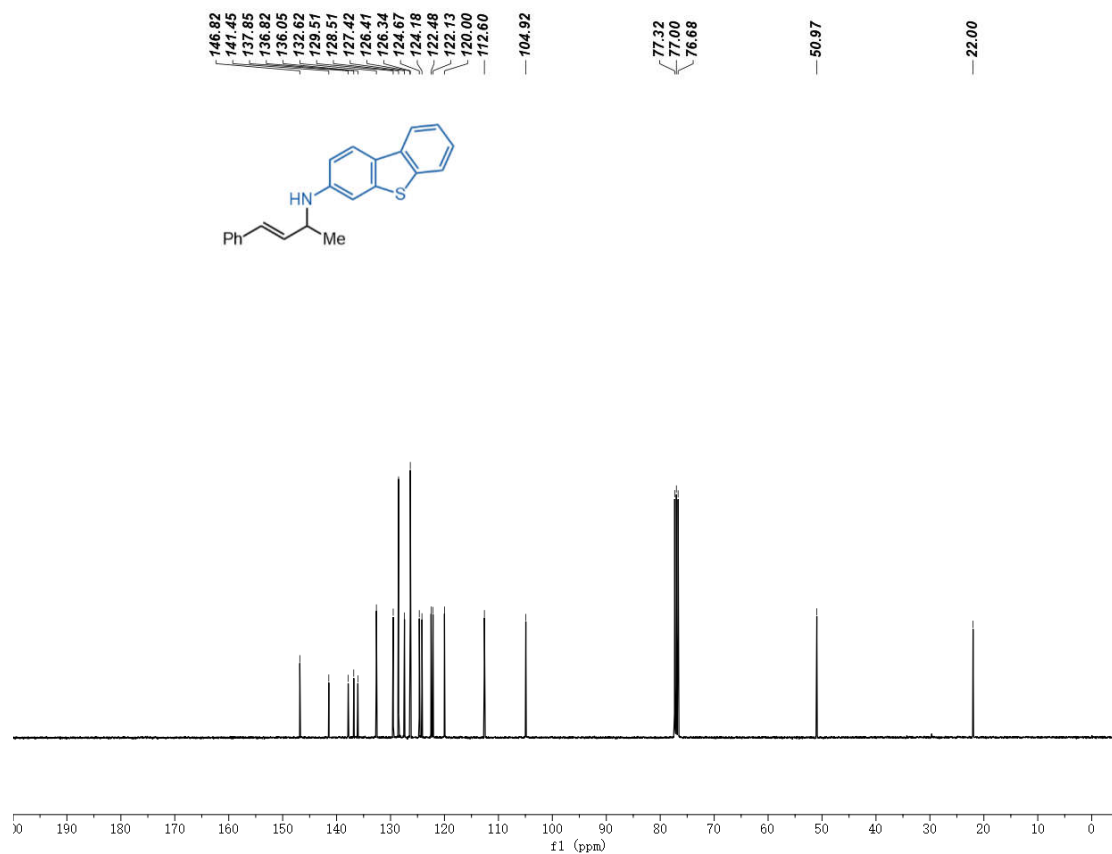

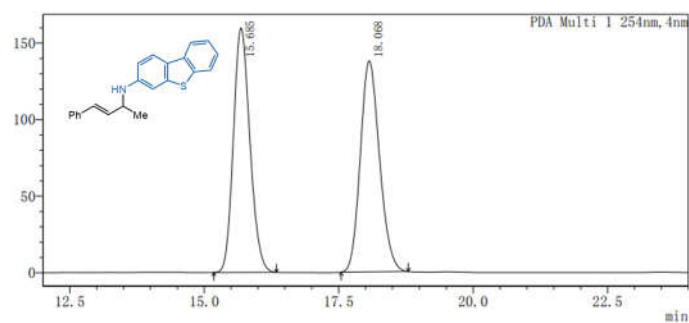

Entry Retention time Area Height Area%

PDA Ch1 254nm

| 峰号 | 保留时间   | 面积      | 高度     | 面积%     |
|----|--------|---------|--------|---------|
| 1  | 15.685 | 3409024 | 159597 | 49.847  |
| 2  | 18.068 | 3430009 | 137912 | 50.153  |
| 总计 |        | 6839033 | 297510 | 100.000 |

Total

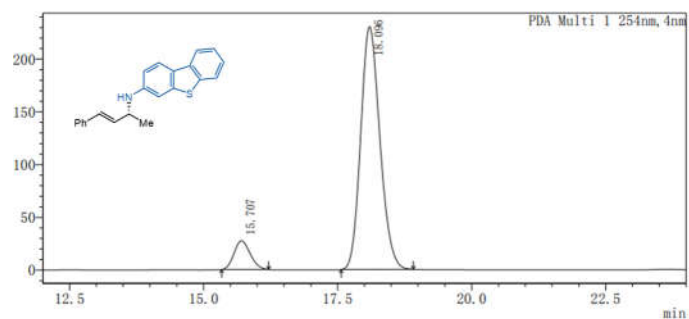

Entry Retention time Area Height Area%

PDA Ch1 254nm

| 峰号 | 保留时间   | 面积      | 高度     | 面积%     |
|----|--------|---------|--------|---------|
| 1  | 15.707 | 571930  | 27309  | 9.063   |
| 2  | 18.096 | 5738516 | 230166 | 90.937  |
| 总计 |        | 6310446 | 257474 | 100.000 |

Total

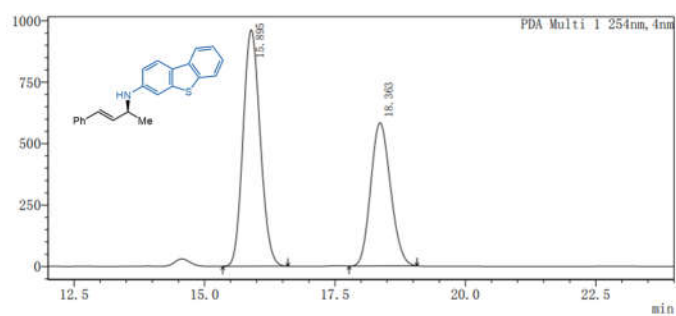

Entry Retention time Area Height Area%

PDA Ch1 254nm

| 峰号 | 保留时间   | 面积       | 高度      | 面积%     |
|----|--------|----------|---------|---------|
| 1  | 15.895 | 22013862 | 961914  | 58.768  |
| 2  | 18.363 | 15445058 | 583125  | 41.232  |
| 总计 |        | 37458920 | 1545039 | 100.000 |

Total

<sup>1</sup>H NMR (400 MHz, CDCl<sub>3</sub>) spectrum of **3ba**

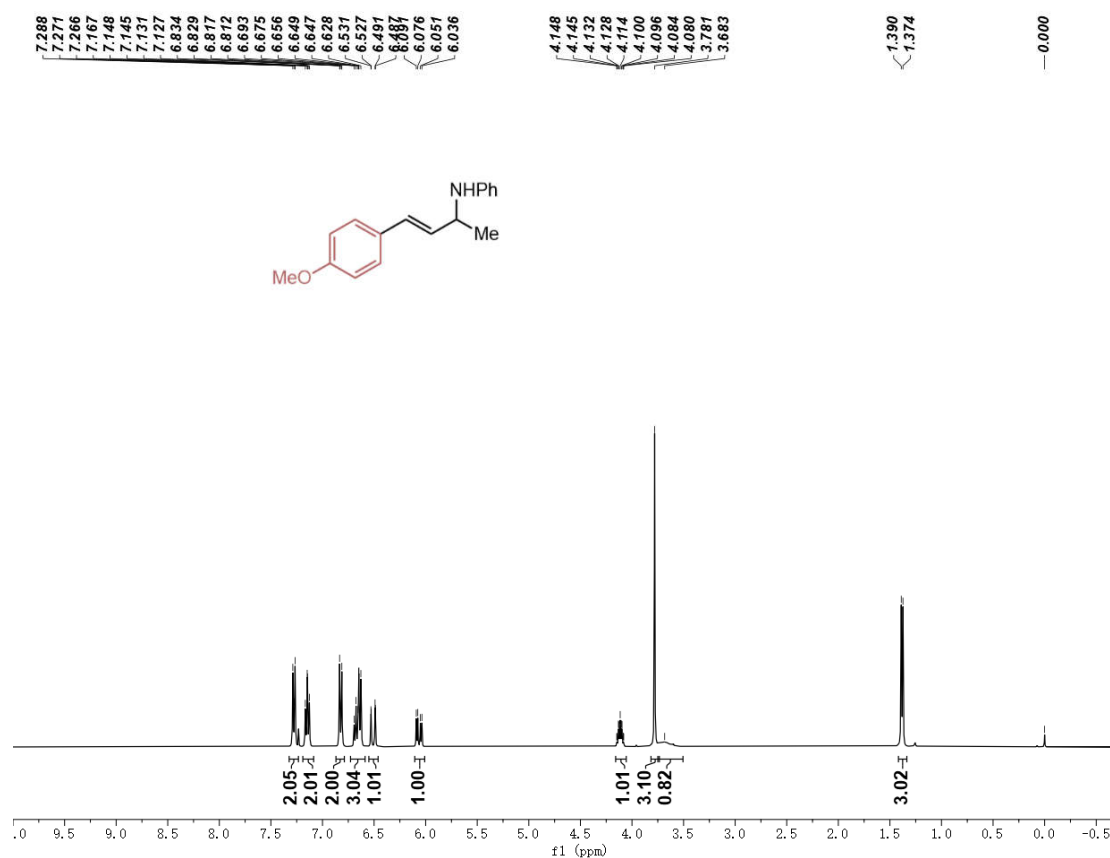

<sup>13</sup>C NMR (101 MHz, CDCl<sub>3</sub>) spectrum of **3ba**

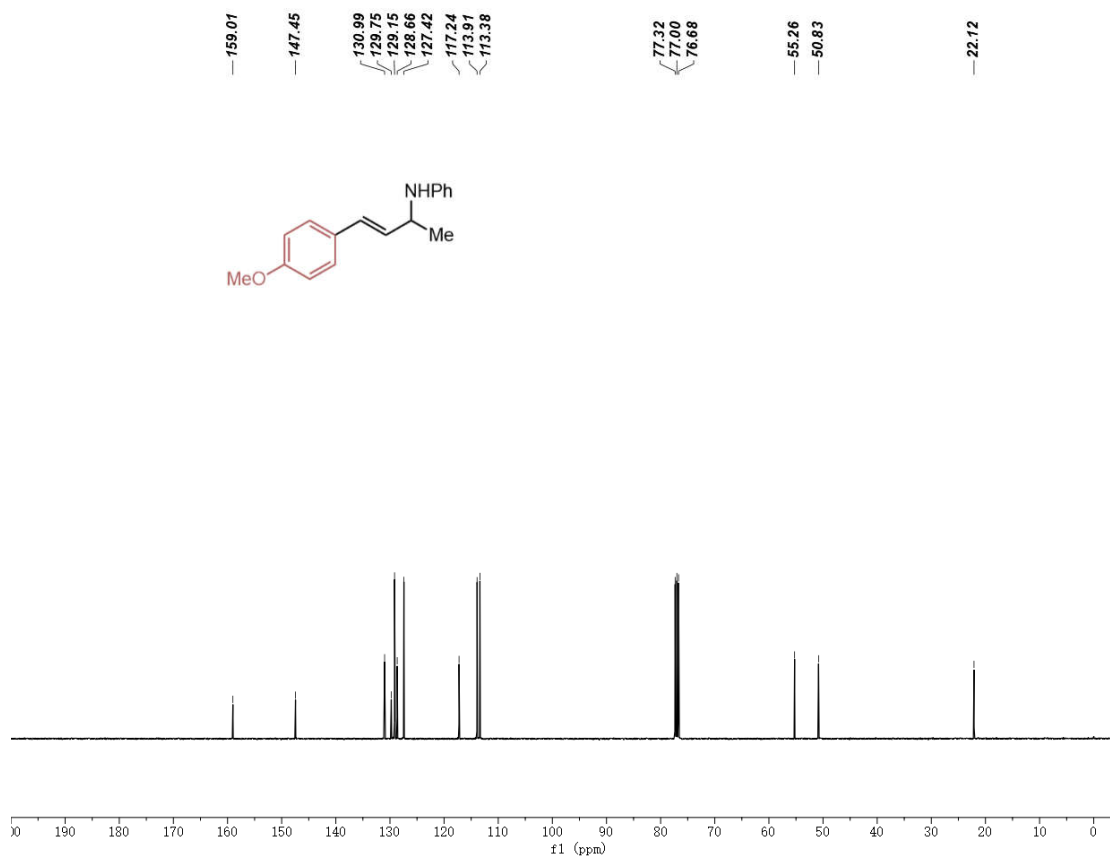

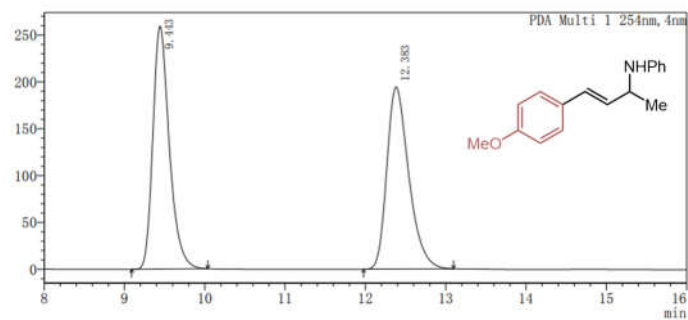

Entry Retention time Area Height Area%  
PDA Ch1 254nm

| 峰号 | 保留时间   | 面积      | 高度     | 面积%     |
|----|--------|---------|--------|---------|
| 1  | 9.443  | 3697815 | 259265 | 50.035  |
| 2  | 12.383 | 3692645 | 194379 | 49.965  |
| 总计 |        | 7390461 | 453644 | 100.000 |

Total

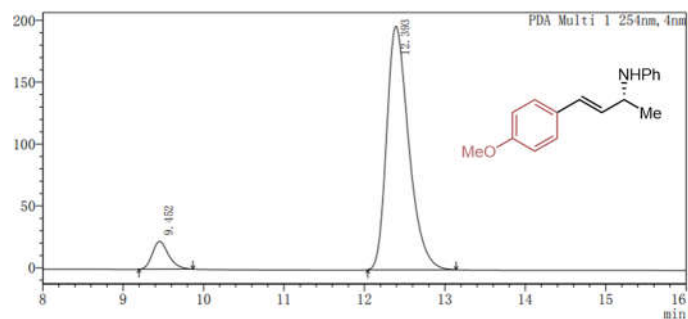

Entry Retention time Area Height Area%  
PDA Ch1 254nm

| 峰号 | 保留时间   | 面积      | 高度     | 面积%     |
|----|--------|---------|--------|---------|
| 1  | 9.452  | 317051  | 22465  | 7.757   |
| 2  | 12.393 | 3770246 | 196857 | 92.243  |
| 总计 |        | 4087296 | 219322 | 100.000 |

Total

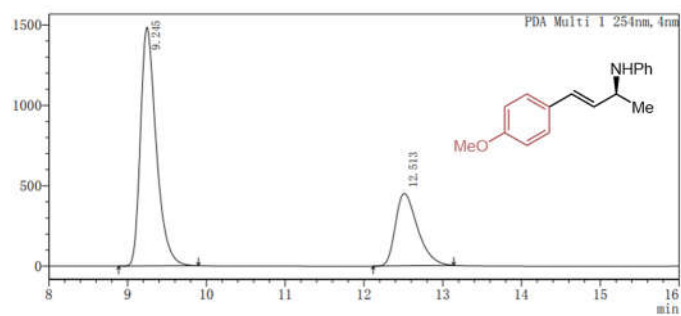

Entry Retention time Area Height Area%  
PDA Ch1 254nm

| 峰号 | 保留时间   | 面积       | 高度      | 面积%     |
|----|--------|----------|---------|---------|
| 1  | 9.245  | 20697262 | 1483775 | 70.099  |
| 2  | 12.513 | 8828332  | 450940  | 29.901  |
| 总计 |        | 29525593 | 1934716 | 100.000 |

Total

$^1\text{H}$  NMR (400 MHz,  $\text{CDCl}_3$ ) spectrum of **3ca**

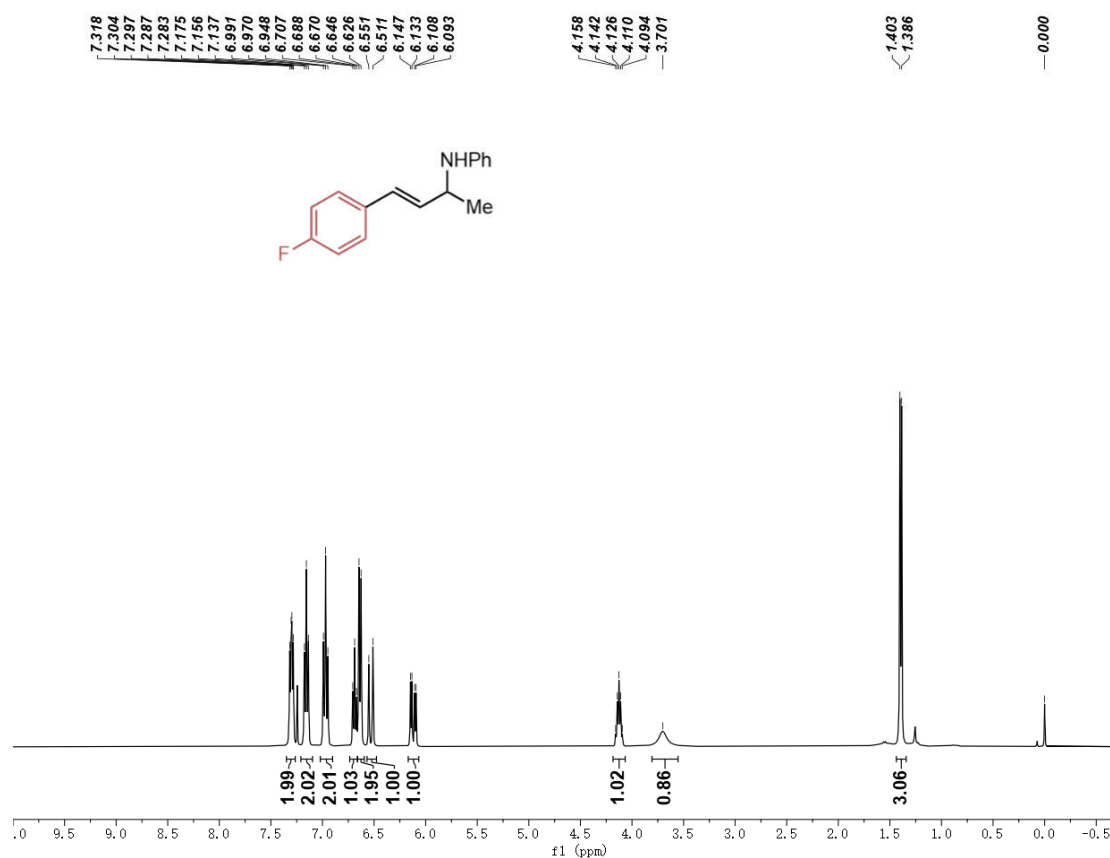

$^{13}\text{C}$  NMR (101 MHz,  $\text{CDCl}_3$ ) spectrum of **3ca**

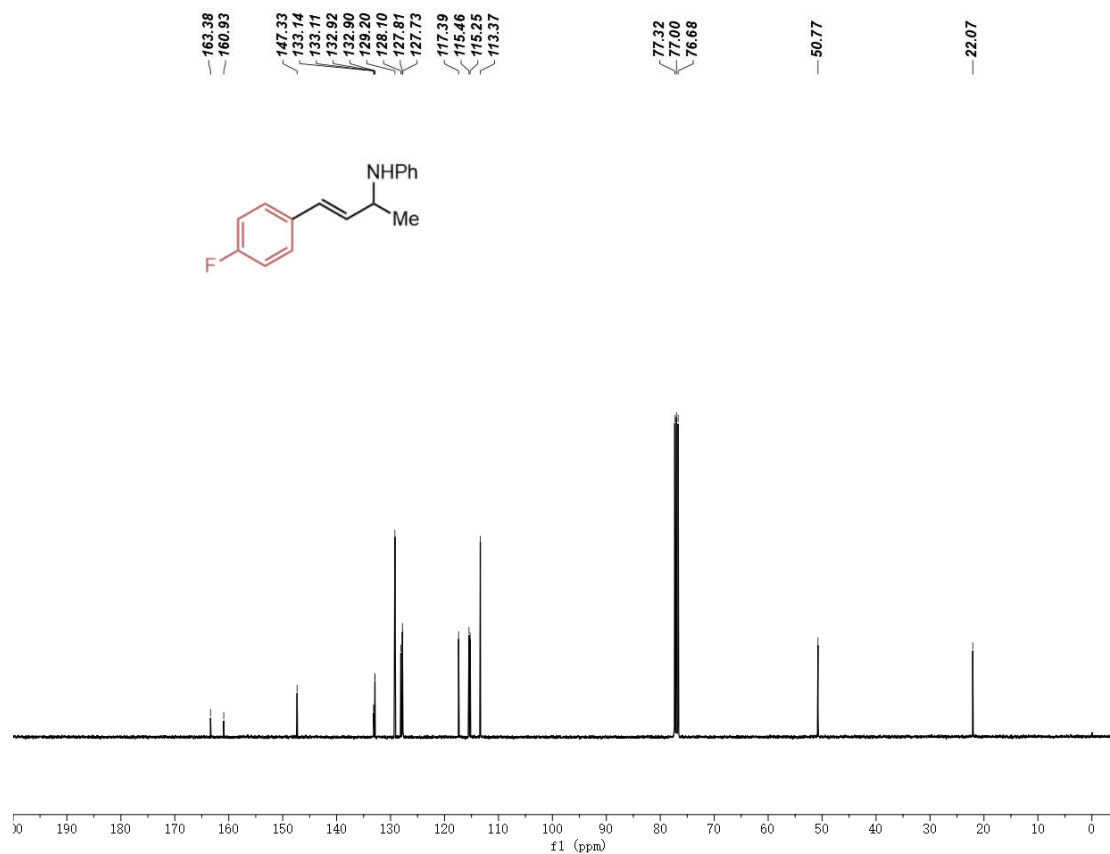

$^{19}\text{F}$  NMR (377 MHz,  $\text{CDCl}_3$ ) spectrum of **3ca**

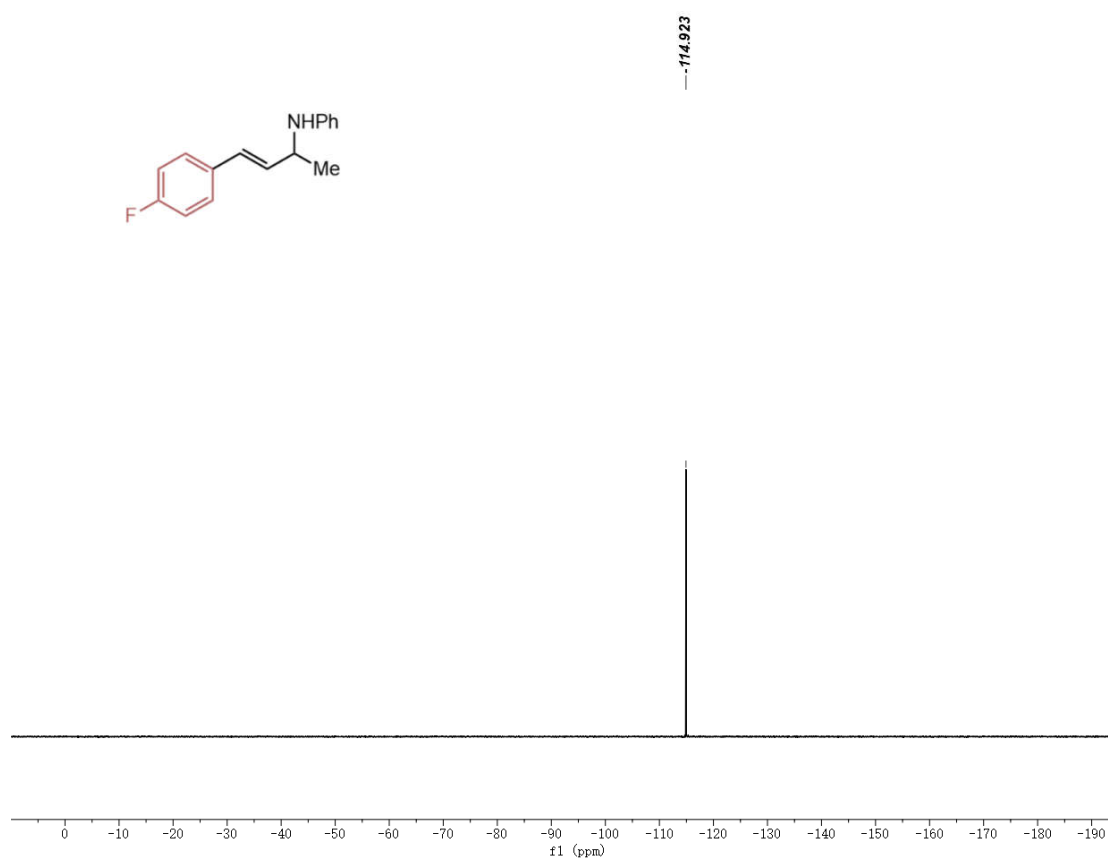



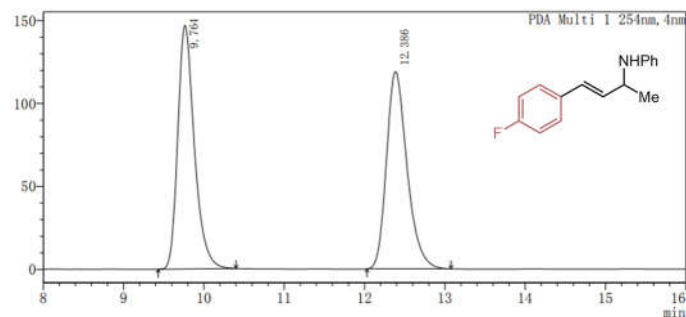

Entry Retention time Area Height Area%

PDA Ch1 254nm

| 峰号 | 保留时间   | 面积      | 高度     | 面积%     |
|----|--------|---------|--------|---------|
| 1  | 9.764  | 2110586 | 146764 | 49.895  |
| 2  | 12.386 | 2119449 | 118848 | 50.105  |
| 总计 |        | 4230035 | 265611 | 100.000 |

Total

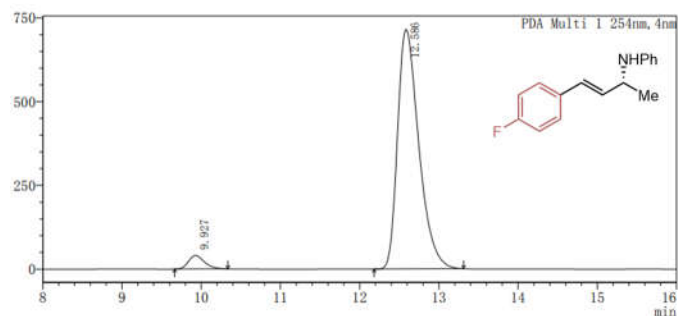

Entry Retention time Area Height Area%

PDA Ch1 254nm

| 峰号 | 保留时间   | 面积       | 高度     | 面积%     |
|----|--------|----------|--------|---------|
| 1  | 9.927  | 571047   | 40629  | 4.105   |
| 2  | 12.586 | 13341298 | 715325 | 95.895  |
| 总计 |        | 13912345 | 755954 | 100.000 |

Total

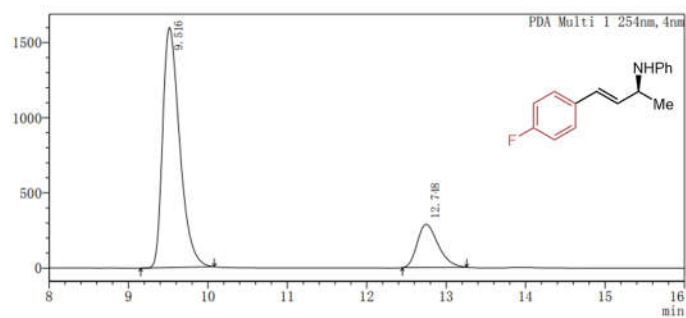

Entry Retention time Area Height Area%

PDA Ch1 254nm

| 峰号 | 保留时间   | 面积       | 高度      | 面积%     |
|----|--------|----------|---------|---------|
| 1  | 9.516  | 23776274 | 1595986 | 81.890  |
| 2  | 12.748 | 5258252  | 286962  | 18.110  |
| 总计 |        | 29034526 | 1882947 | 100.000 |

Total

$^1\text{H}$  NMR (400 MHz,  $\text{CDCl}_3$ ) spectrum of **3da**

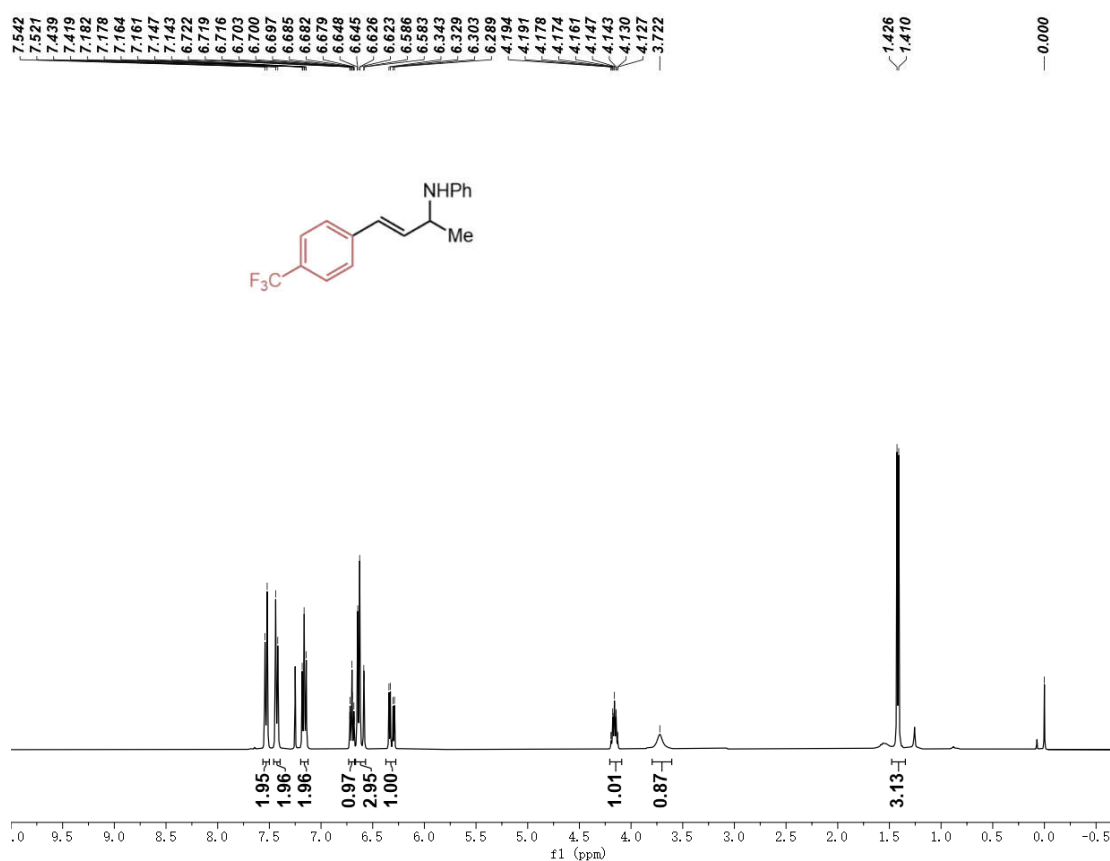

$^{13}\text{C}$  NMR (101 MHz,  $\text{CDCl}_3$ ) spectrum of **3da**

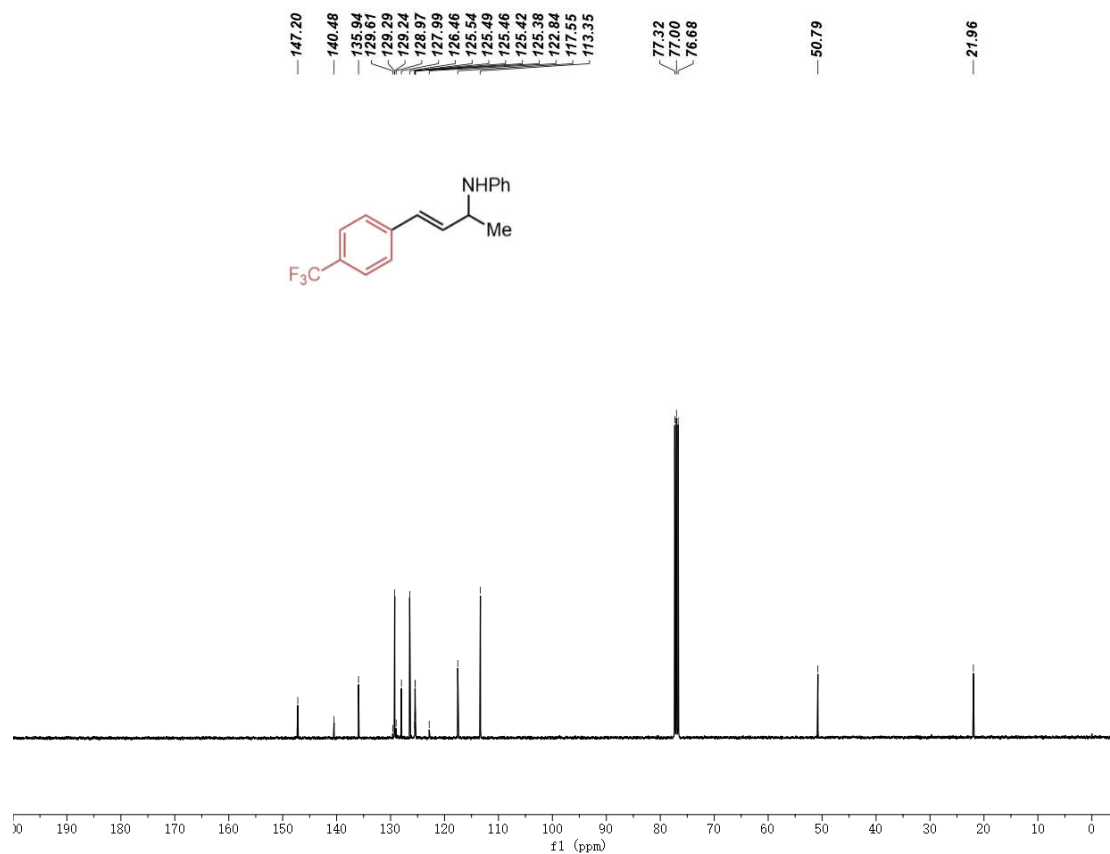

$^{19}\text{F}$  NMR (377 MHz,  $\text{CDCl}_3$ ) spectrum of **3da**

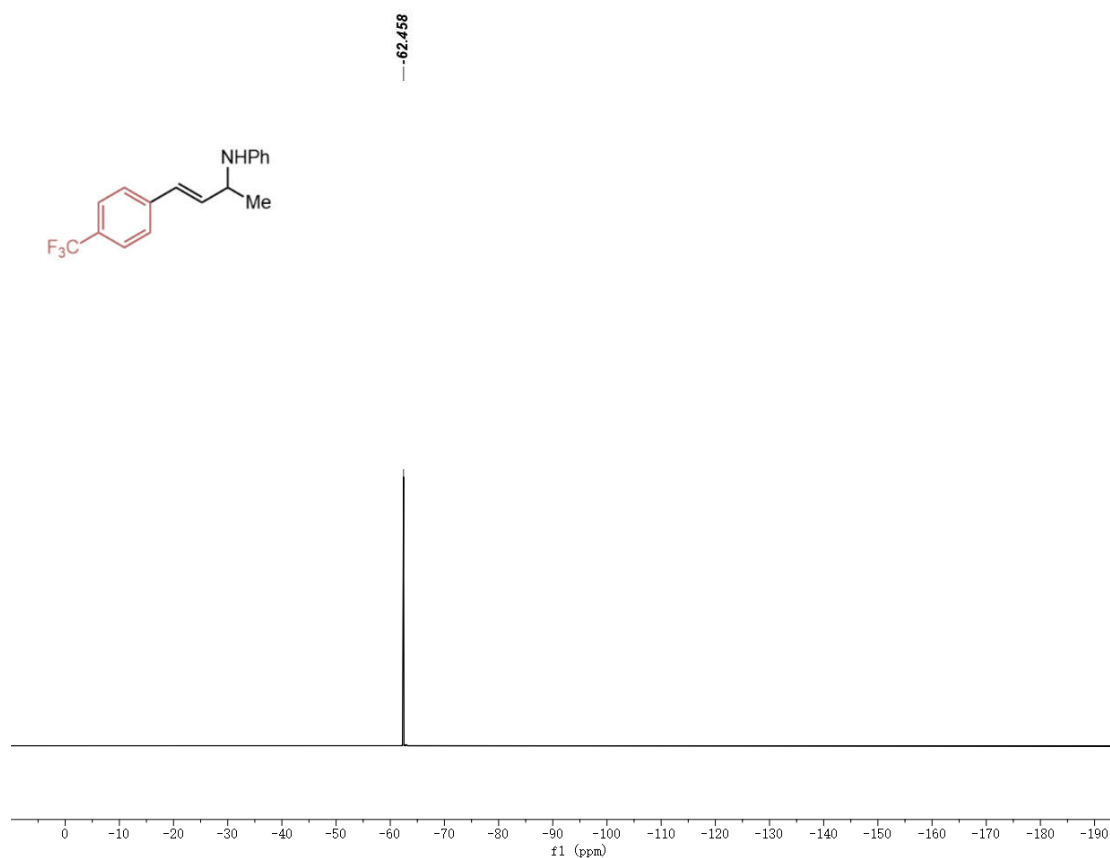

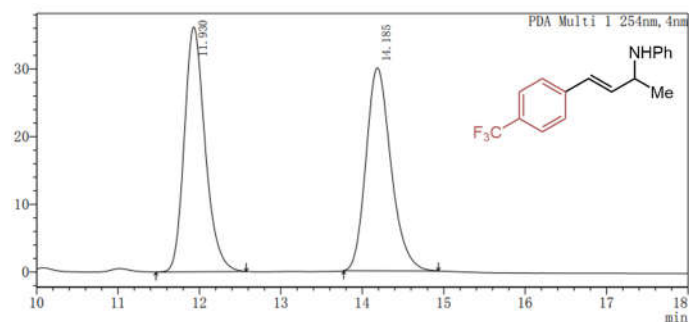

Entry Retention time Area Height Area%

PDA Ch1 254nm

| 峰号 | 保留时间   | 面积      | 高度    | 面积%     |
|----|--------|---------|-------|---------|
| 1  | 11.930 | 644693  | 36119 | 50.169  |
| 2  | 14.185 | 640351  | 29988 | 49.831  |
| 总计 |        | 1285044 | 66107 | 100.000 |

Total

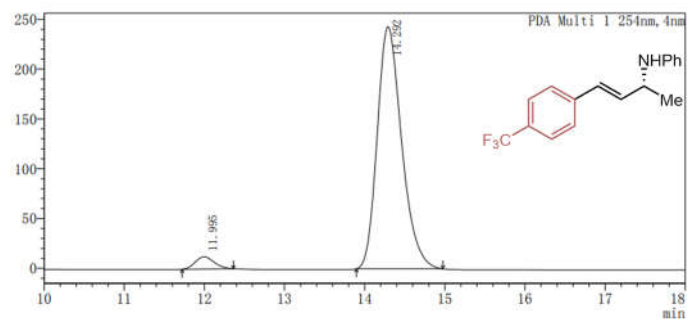

Entry Retention time Area Height Area%

PDA Ch1 254nm

| 峰号 | 保留时间   | 面积      | 高度     | 面积%     |
|----|--------|---------|--------|---------|
| 1  | 11.995 | 203089  | 12351  | 3.793   |
| 2  | 14.292 | 5151080 | 243060 | 96.207  |
| 总计 |        | 5354169 | 255411 | 100.000 |

Total

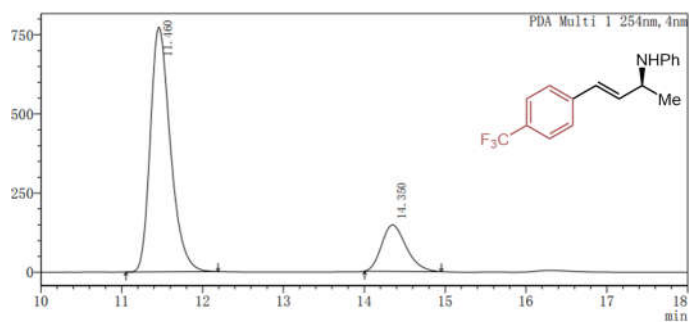

Entry Retention time Area Height Area%

PDA Ch1 254nm

| 峰号 | 保留时间   | 面积       | 高度     | 面积%     |
|----|--------|----------|--------|---------|
| 1  | 11.460 | 13388127 | 772849 | 81.133  |
| 2  | 14.350 | 3113398  | 146457 | 18.867  |
| 总计 |        | 16501524 | 919305 | 100.000 |

Total

<sup>1</sup>H NMR (400 MHz, CDCl<sub>3</sub>) spectrum of **3ea**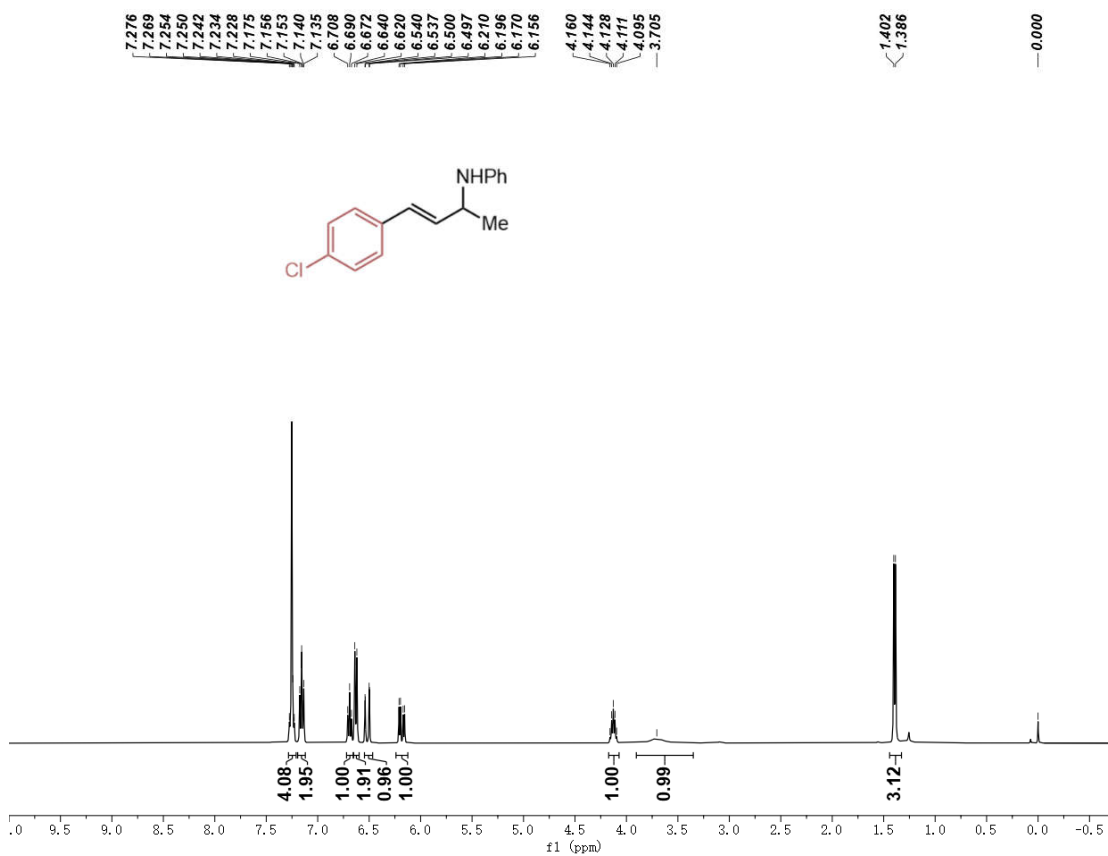 $^{13}\text{C}$  NMR (101 MHz,  $\text{CDCl}_3$ ) spectrum of **3ea**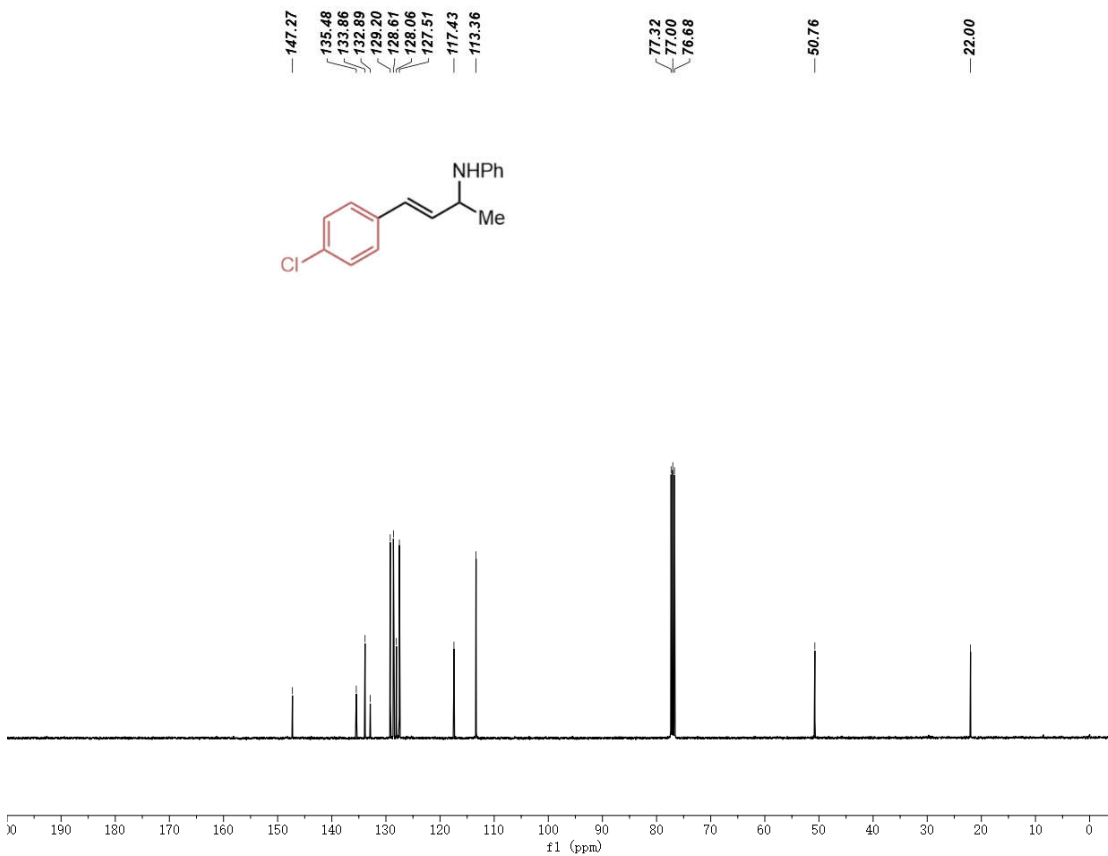

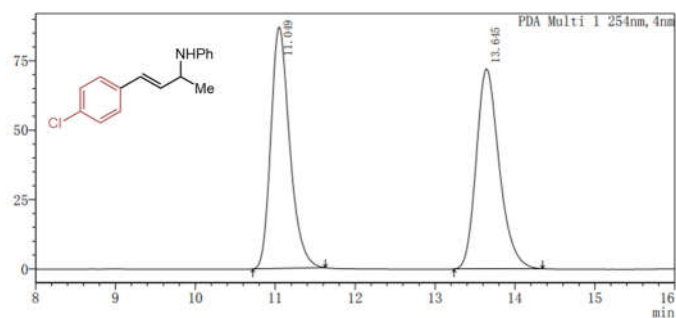

Entry Retention time Area Height Area%  
PDA Ch1 254nm

| 峰号 | 保留时间   | 面积      | 高度     | 面积%     |
|----|--------|---------|--------|---------|
| 1  | 11.049 | 1429500 | 86965  | 49.750  |
| 2  | 13.645 | 1443842 | 72011  | 50.250  |
| 总计 |        | 2873342 | 158976 | 100.000 |

Total

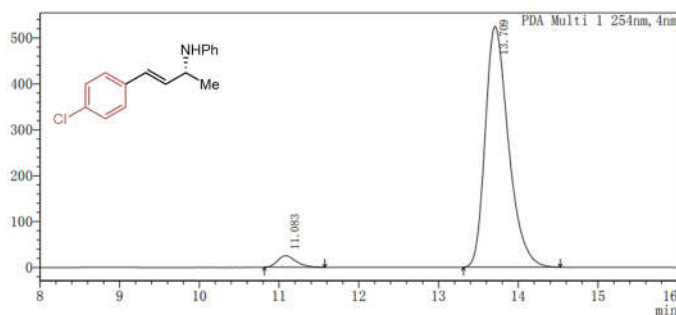

Entry Retention time Area Height Area%  
PDA Ch1 254nm

| 峰号 | 保留时间   | 面积       | 高度     | 面积%     |
|----|--------|----------|--------|---------|
| 1  | 11.083 | 404620   | 25143  | 3.662   |
| 2  | 13.709 | 10644026 | 524702 | 96.338  |
| 总计 |        | 11048646 | 549845 | 100.000 |

Total

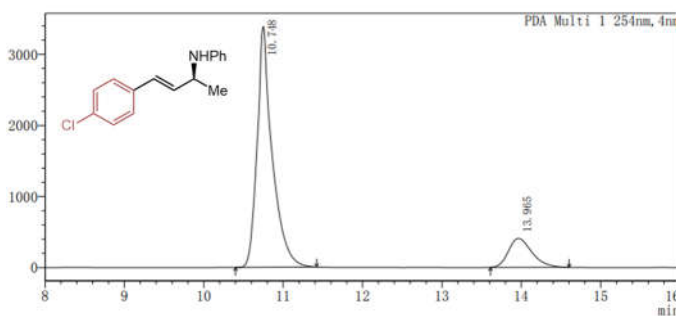

Entry Retention time Area Height Area%  
PDA Ch1 254nm

| 峰号 | 保留时间   | 面积       | 高度      | 面积%     |
|----|--------|----------|---------|---------|
| 1  | 10.748 | 44759509 | 3385102 | 84.233  |
| 2  | 13.965 | 8378410  | 407853  | 15.767  |
| 总计 |        | 53137919 | 3792955 | 100.000 |

Total

$^1\text{H}$  NMR (400 MHz,  $\text{CDCl}_3$ ) spectrum of **3fa**

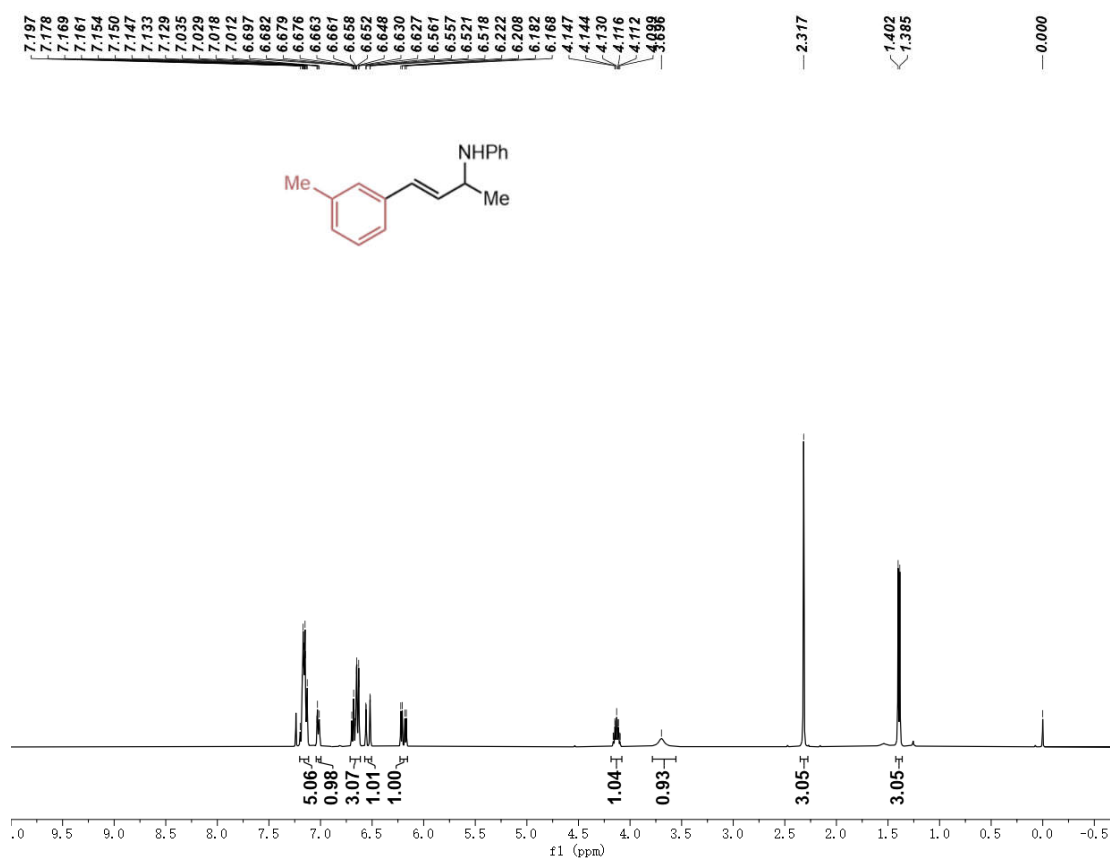

$^{13}\text{C}$  NMR (101 MHz,  $\text{CDCl}_3$ ) spectrum of **3fa**

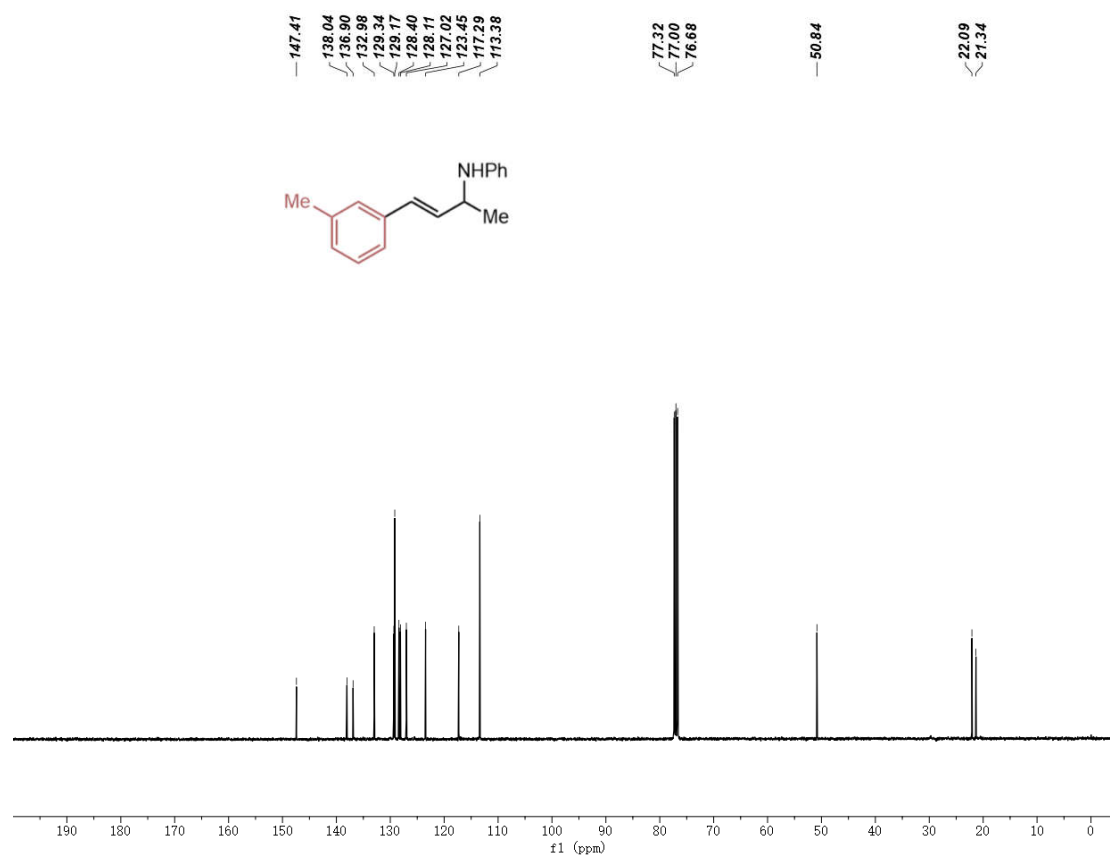

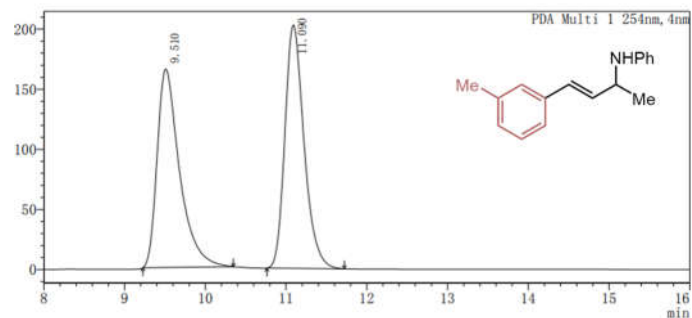

Entry Retention time Area Height Area%

PDA Ch1 254nm

| 峰号 | 保留时间   | 面积      | 高度     | 面积%     |
|----|--------|---------|--------|---------|
| 1  | 9.510  | 3341748 | 166518 | 49.681  |
| 2  | 11.090 | 3384602 | 203197 | 50.319  |
| 总计 |        | 6726350 | 369715 | 100.000 |

Total

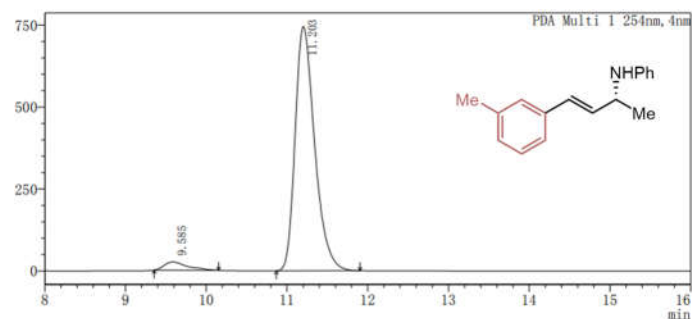

Entry Retention time Area Height Area%

PDA Ch1 254nm

| 峰号 | 保留时间   | 面积       | 高度     | 面积%     |
|----|--------|----------|--------|---------|
| 1  | 9.585  | 504909   | 25217  | 3.875   |
| 2  | 11.203 | 12525999 | 744666 | 96.125  |
| 总计 |        | 13030908 | 769882 | 100.000 |

Total

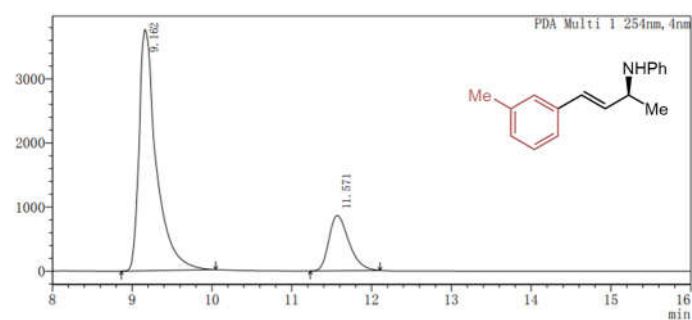

Entry Retention time Area Height Area%

PDA Ch1 254nm

| 峰号 | 保留时间   | 面积       | 高度      | 面积%     |
|----|--------|----------|---------|---------|
| 1  | 9.162  | 56642281 | 3762742 | 78.997  |
| 2  | 11.571 | 15059593 | 863343  | 21.003  |
| 总计 |        | 71701874 | 4626085 | 100.000 |

Total



$^1\text{H}$  NMR (400 MHz,  $\text{CDCl}_3$ ) spectrum of **3ga**

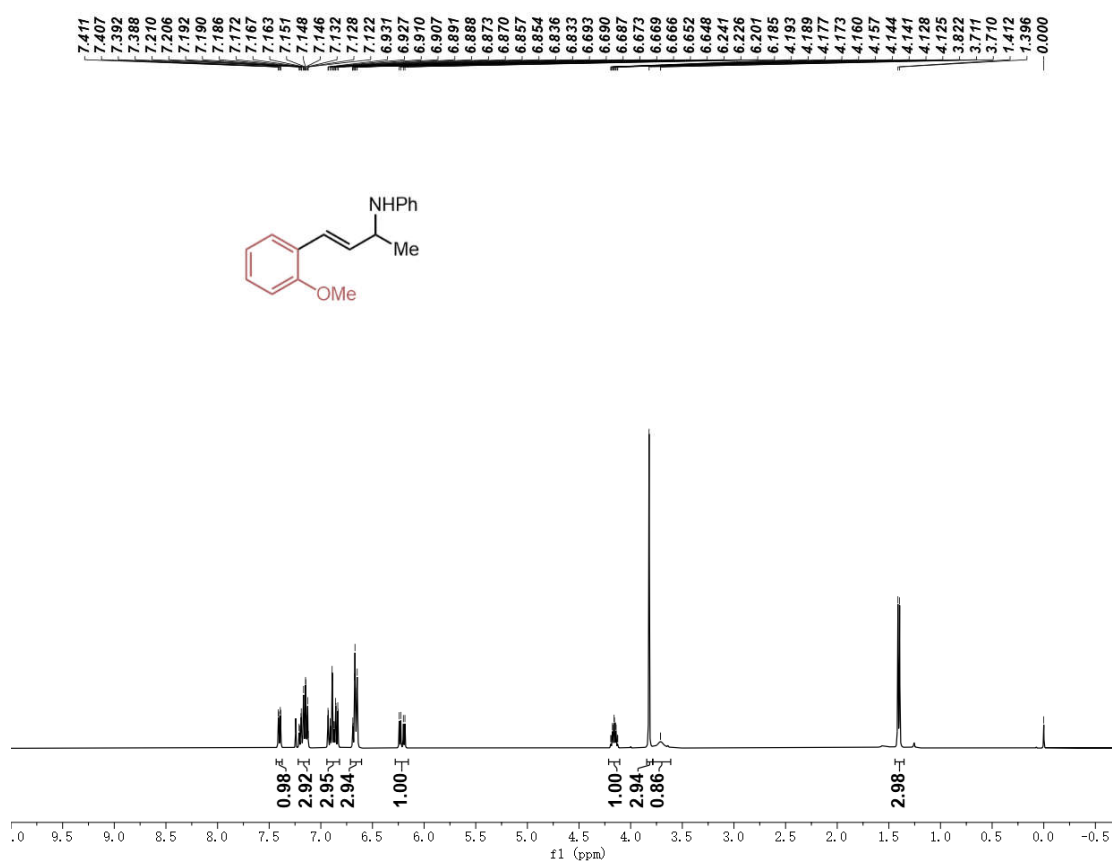

$^{13}\text{C}$  NMR (101 MHz,  $\text{CDCl}_3$ ) spectrum of **3ga**

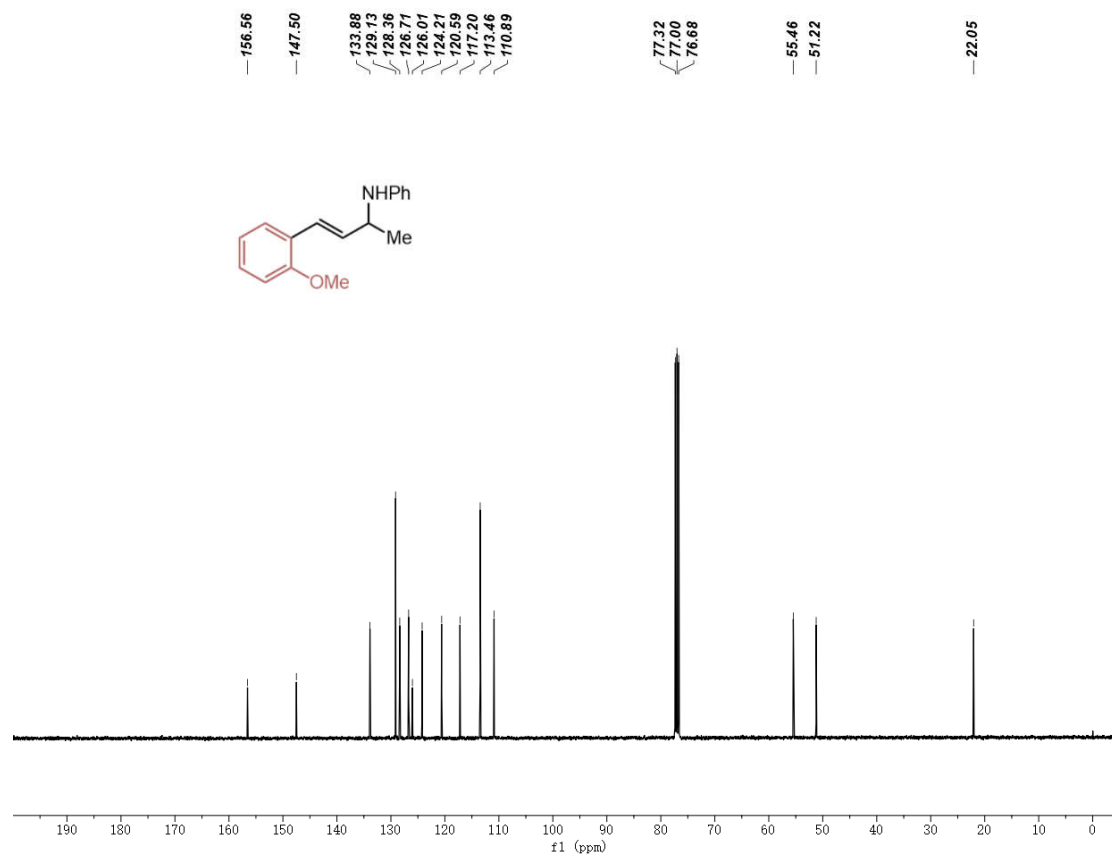

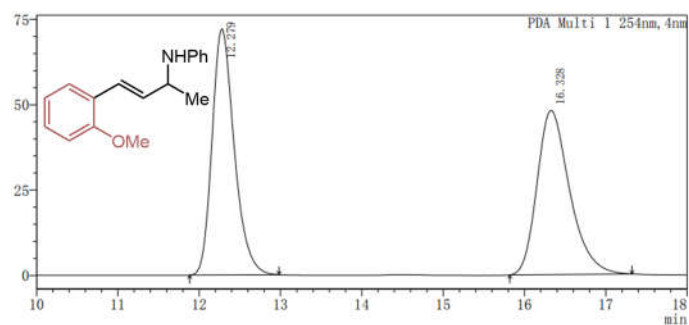

| Entry         | Retention time | Area    | Height | Area%   |
|---------------|----------------|---------|--------|---------|
| PDA Ch1 254nm |                |         |        |         |
| 峰号            | 保留时间           | 面积      | 高度     | 面积%     |
| 1             | 12.279         | 1369002 | 72070  | 50.498  |
| 2             | 16.328         | 1341975 | 48104  | 49.502  |
| 总计            |                | 2710977 | 120173 | 100.000 |

Total

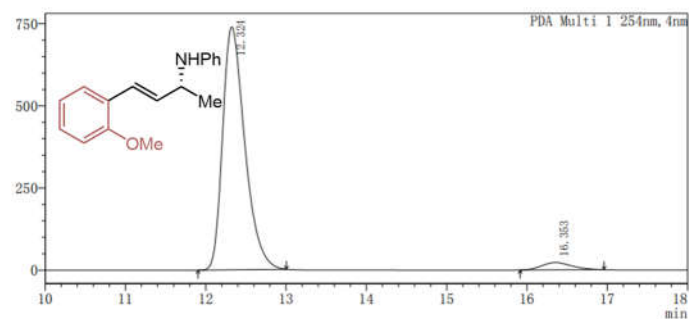

| Entry         | Retention time | Area     | Height | Area%   |
|---------------|----------------|----------|--------|---------|
| PDA Ch1 254nm |                |          |        |         |
| 峰号            | 保留时间           | 面积       | 高度     | 面积%     |
| 1             | 12.324         | 14213763 | 739050 | 96.047  |
| 2             | 16.353         | 585042   | 22306  | 3.953   |
| 总计            |                | 14798806 | 761356 | 100.000 |

Total

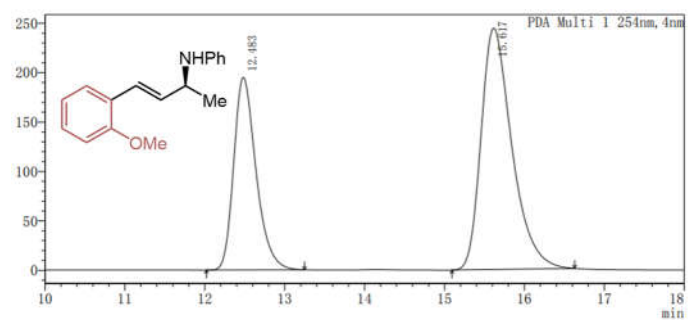

| Entry         | Retention time | Area     | Height | Area%   |
|---------------|----------------|----------|--------|---------|
| PDA Ch1 254nm |                |          |        |         |
| 峰号            | 保留时间           | 面积       | 高度     | 面积%     |
| 1             | 12.483         | 3788295  | 194971 | 36.657  |
| 2             | 15.617         | 6546246  | 244263 | 63.343  |
| 总计            |                | 10334541 | 439234 | 100.000 |

Total

$^1\text{H}$  NMR (400 MHz,  $\text{CDCl}_3$ ) spectrum of **3ha**

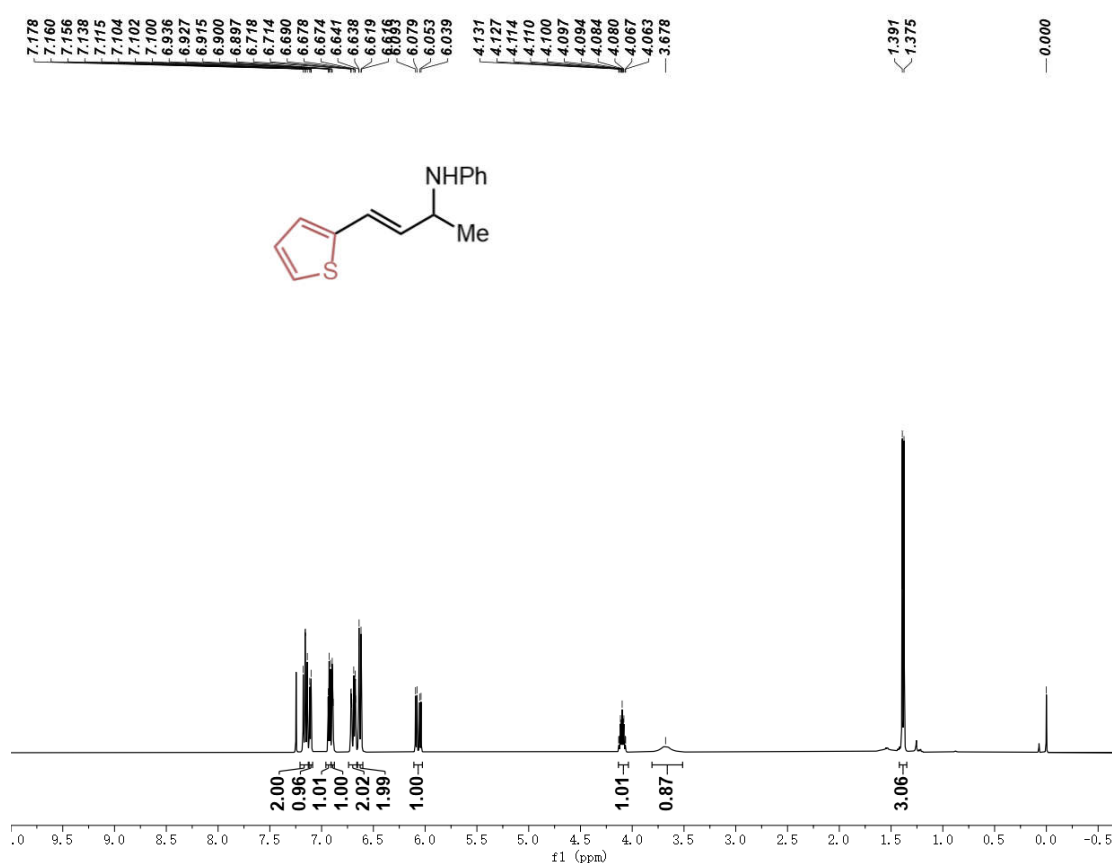

$^{13}\text{C}$  NMR (101 MHz,  $\text{CDCl}_3$ ) spectrum of **3ha**

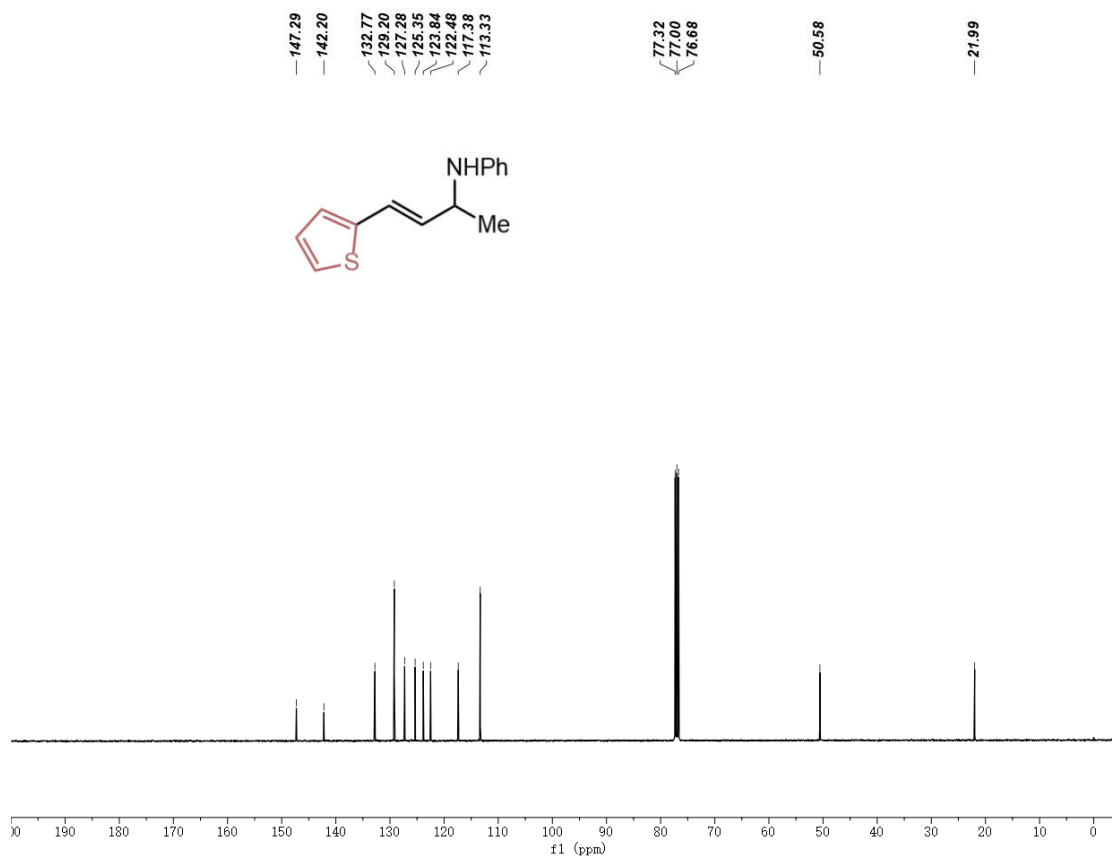

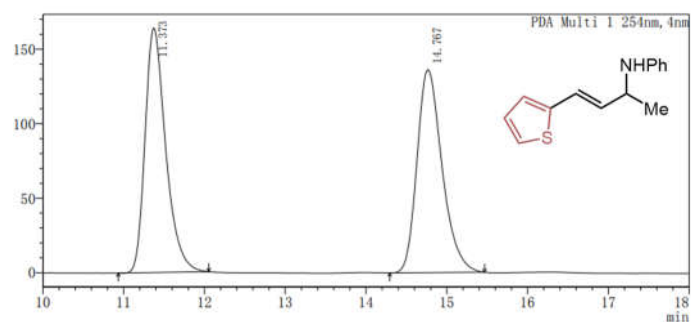

Entry Retention time Area Height Area%

PDA Ch1 254nm

| 峰号 | 保留时间   | 面积      | 高度     | 面积%     |
|----|--------|---------|--------|---------|
| 1  | 11.373 | 2924081 | 164131 | 49.837  |
| 2  | 14.767 | 2943266 | 136245 | 50.163  |
| 总计 |        | 5867347 | 300376 | 100.000 |

Total

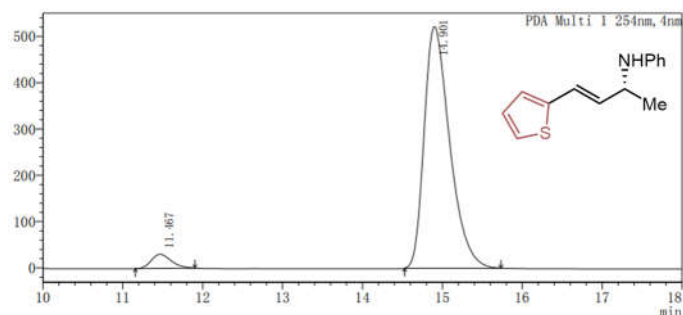

Entry Retention time Area Height Area%

PDA Ch1 254nm

| 峰号 | 保留时间   | 面积       | 高度     | 面积%     |
|----|--------|----------|--------|---------|
| 1  | 11.467 | 532209   | 30598  | 4.387   |
| 2  | 14.901 | 11598826 | 521444 | 95.613  |
| 总计 |        | 12131036 | 552042 | 100.000 |

Total

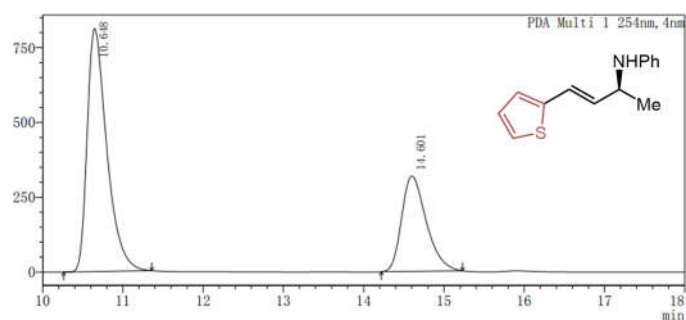

Entry Retention time Area Height Area%

PDA Ch1 254nm

| 峰号 | 保留时间   | 面积       | 高度      | 面积%     |
|----|--------|----------|---------|---------|
| 1  | 10.648 | 13849175 | 811952  | 67.032  |
| 2  | 14.601 | 6811493  | 318872  | 32.968  |
| 总计 |        | 20660668 | 1130824 | 100.000 |

Total

$^1\text{H}$  NMR (400 MHz,  $\text{CDCl}_3$ ) spectrum of **3ia**

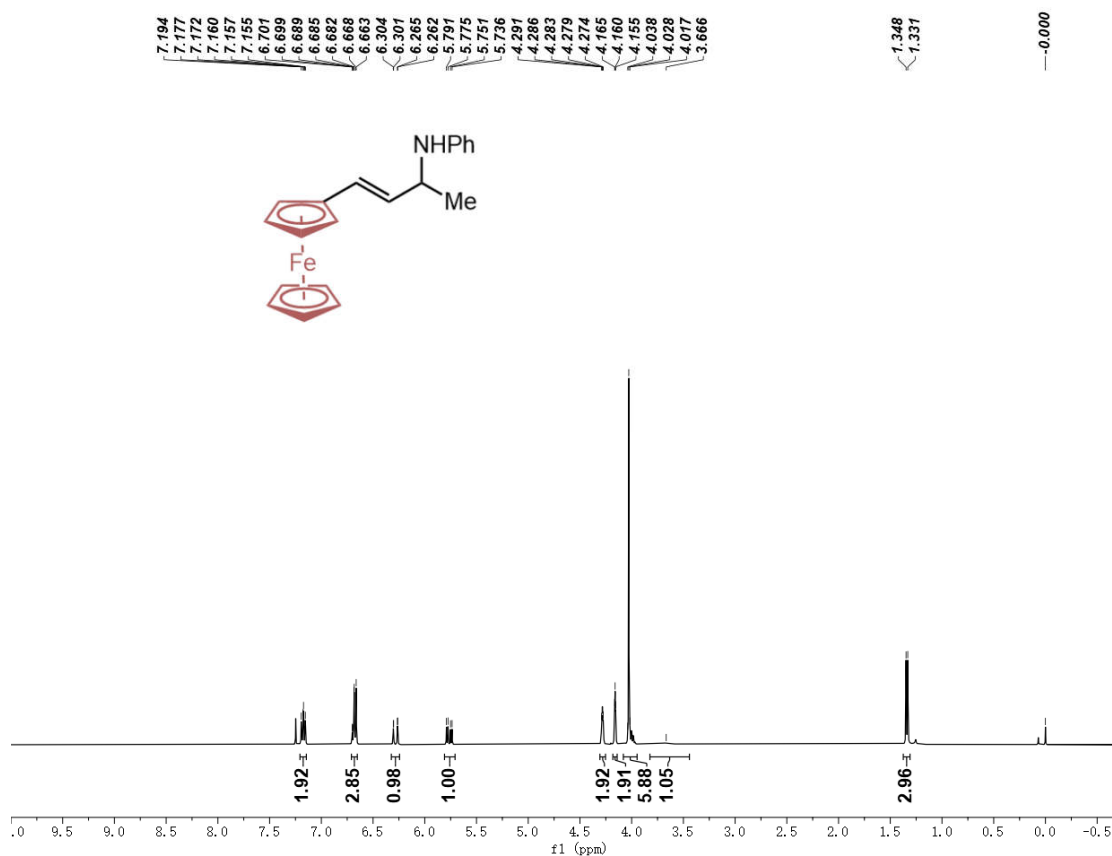

$^{13}\text{C}$  NMR (101 MHz,  $\text{CDCl}_3$ ) spectrum of **3ia**

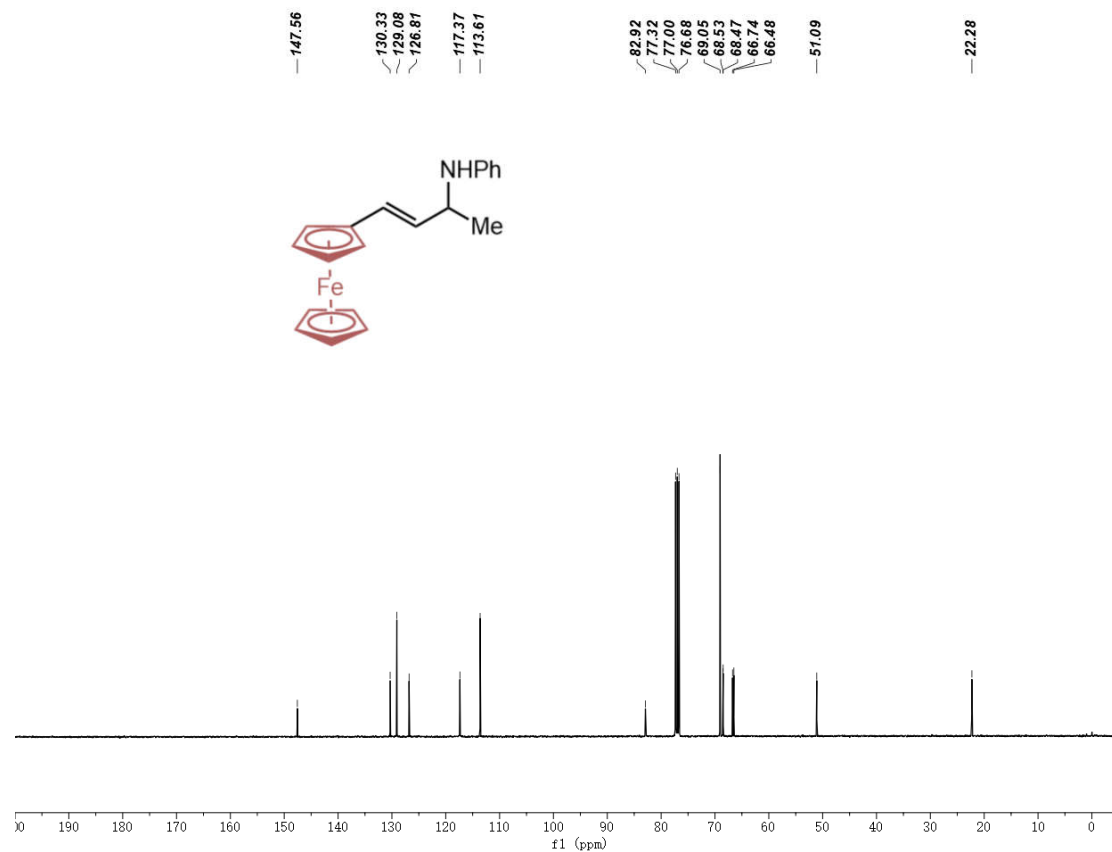

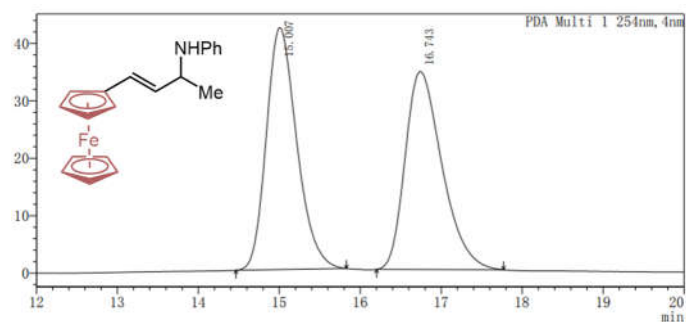

Entry Retention time Area Height Area%

PDA Ch1 254nm

| 峰号 | 保留时间   | 面积      | 高度    | 面积%     |
|----|--------|---------|-------|---------|
| 1  | 15.007 | 1102121 | 42135 | 50.203  |
| 2  | 16.743 | 1093224 | 34479 | 49.797  |
| 总计 |        | 2195345 | 76614 | 100.000 |

Total

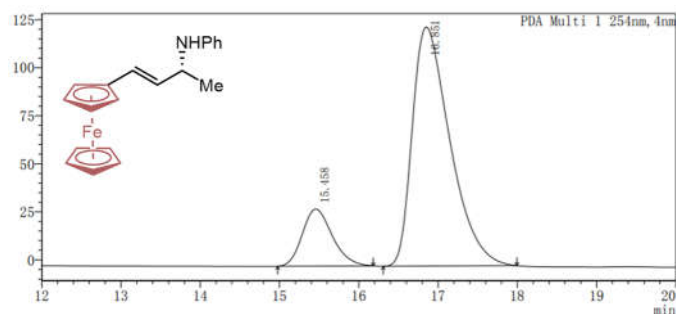

Entry Retention time Area Height Area%

PDA Ch1 254nm

| 峰号 | 保留时间   | 面积      | 高度     | 面积%     |
|----|--------|---------|--------|---------|
| 1  | 15.458 | 781830  | 29687  | 15.966  |
| 2  | 16.851 | 4115051 | 124398 | 84.034  |
| 总计 |        | 4896881 | 154085 | 100.000 |

Total

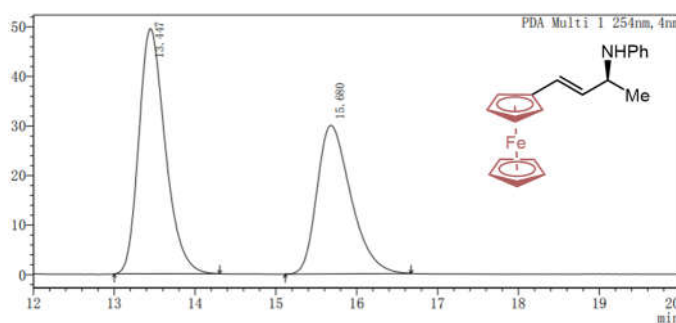

Entry Retention time Area Height Area%

PDA Ch1 254nm

| 峰号 | 保留时间   | 面积      | 高度    | 面积%     |
|----|--------|---------|-------|---------|
| 1  | 13.447 | 1126103 | 49456 | 56.281  |
| 2  | 15.680 | 874766  | 29967 | 43.719  |
| 总计 |        | 2000869 | 79423 | 100.000 |

Total

$^1\text{H}$  NMR (400 MHz,  $\text{CDCl}_3$ ) spectrum of **3ja**

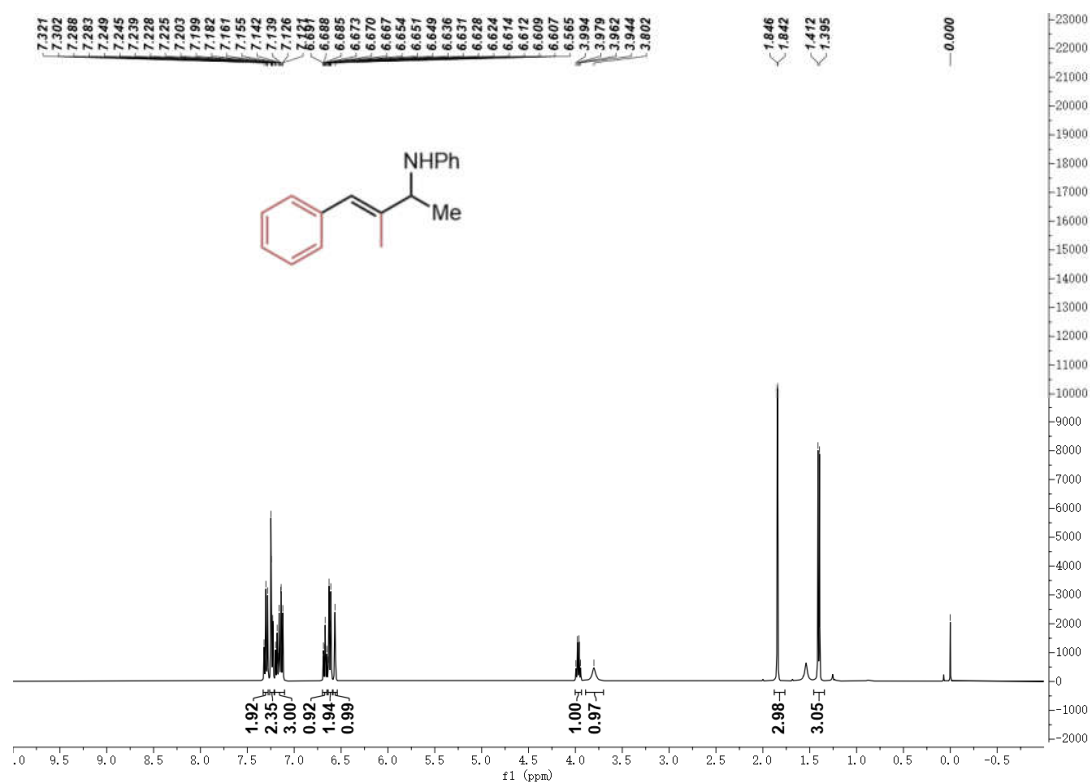

$^{13}\text{C}$  NMR (101 MHz,  $\text{CDCl}_3$ ) spectrum of **3ja**

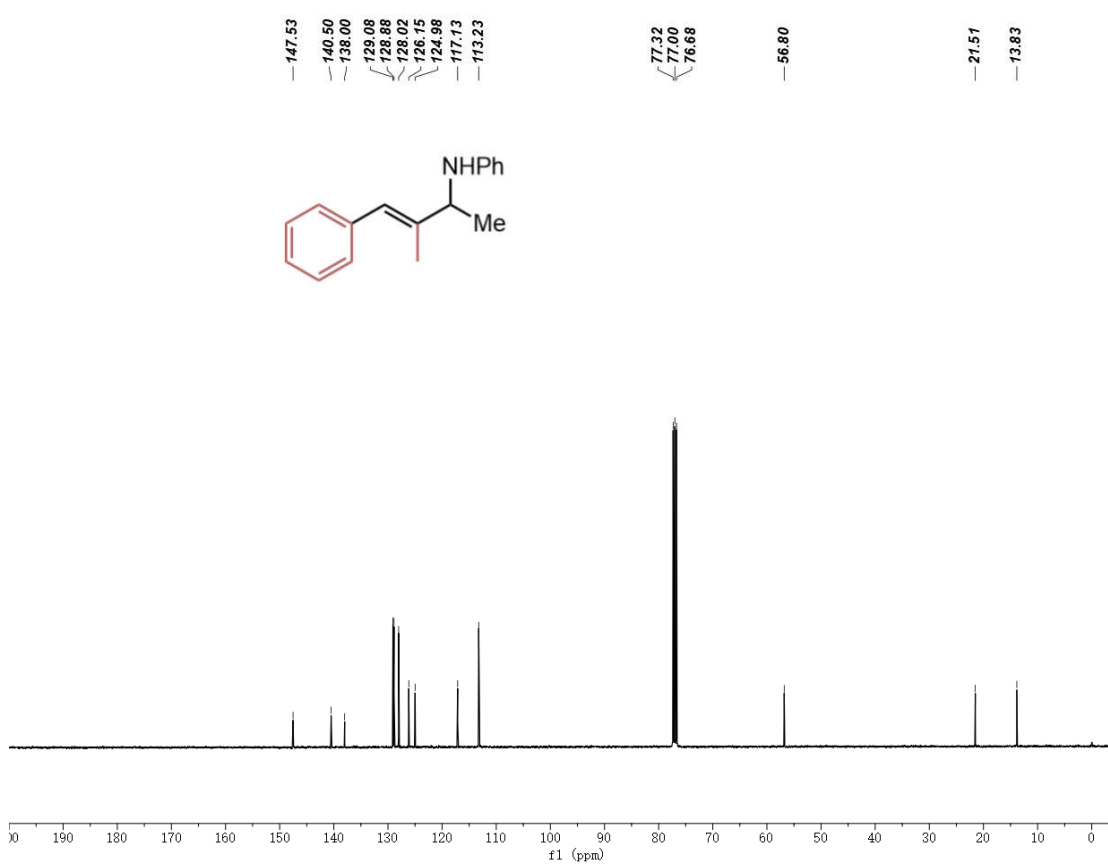

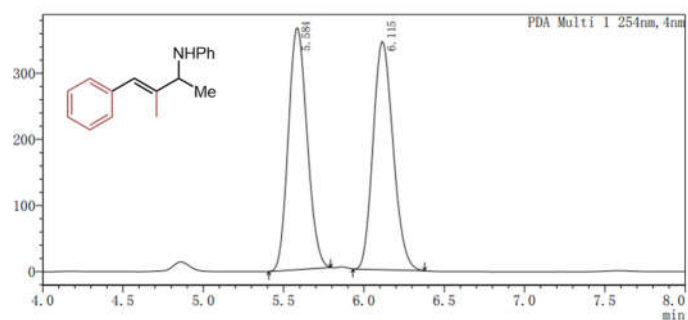

Entry Retention time Area Height Area%

PDA Ch1 254nm

| 峰号 | 保留时间  | 面积      | 高度     | 面积%     |
|----|-------|---------|--------|---------|
| 1  | 5.584 | 2982304 | 365077 | 49.816  |
| 2  | 6.115 | 3004338 | 345233 | 50.184  |
| 总计 |       | 5986642 | 710310 | 100.000 |

Total

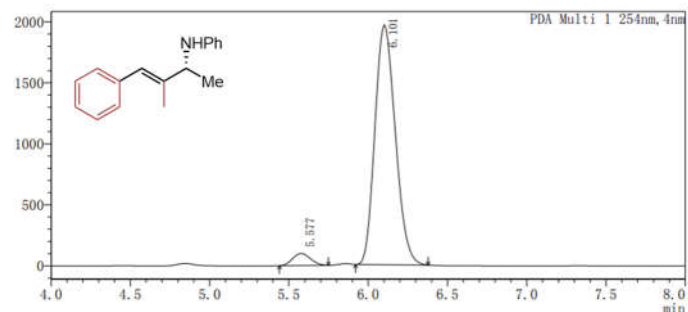

Entry Retention time Area Height Area%

PDA Ch1 254nm

| 峰号 | 保留时间  | 面积       | 高度      | 面积%     |
|----|-------|----------|---------|---------|
| 1  | 5.577 | 778143   | 99072   | 4.233   |
| 2  | 6.101 | 17603521 | 1964925 | 95.767  |
| 总计 |       | 18381665 | 2063997 | 100.000 |

Total

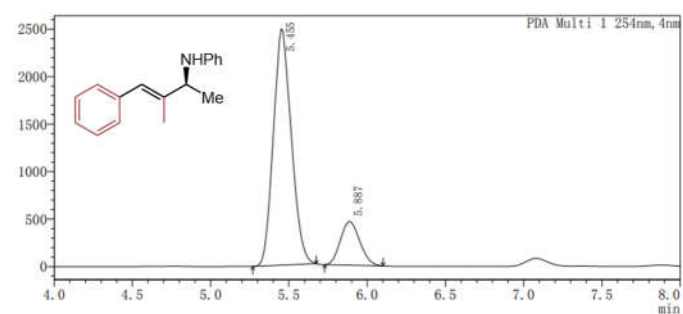

Entry Retention time Area Height Area%

PDA Ch1 254nm

| 峰号 | 保留时间  | 面积       | 高度      | 面积%     |
|----|-------|----------|---------|---------|
| 1  | 5.455 | 19865136 | 2487865 | 83.313  |
| 2  | 5.887 | 3978775  | 460365  | 16.687  |
| 总计 |       | 23843911 | 2948230 | 100.000 |

Total



$^1\text{H}$  NMR (400 MHz,  $\text{CDCl}_3$ ) spectrum of **3ka**

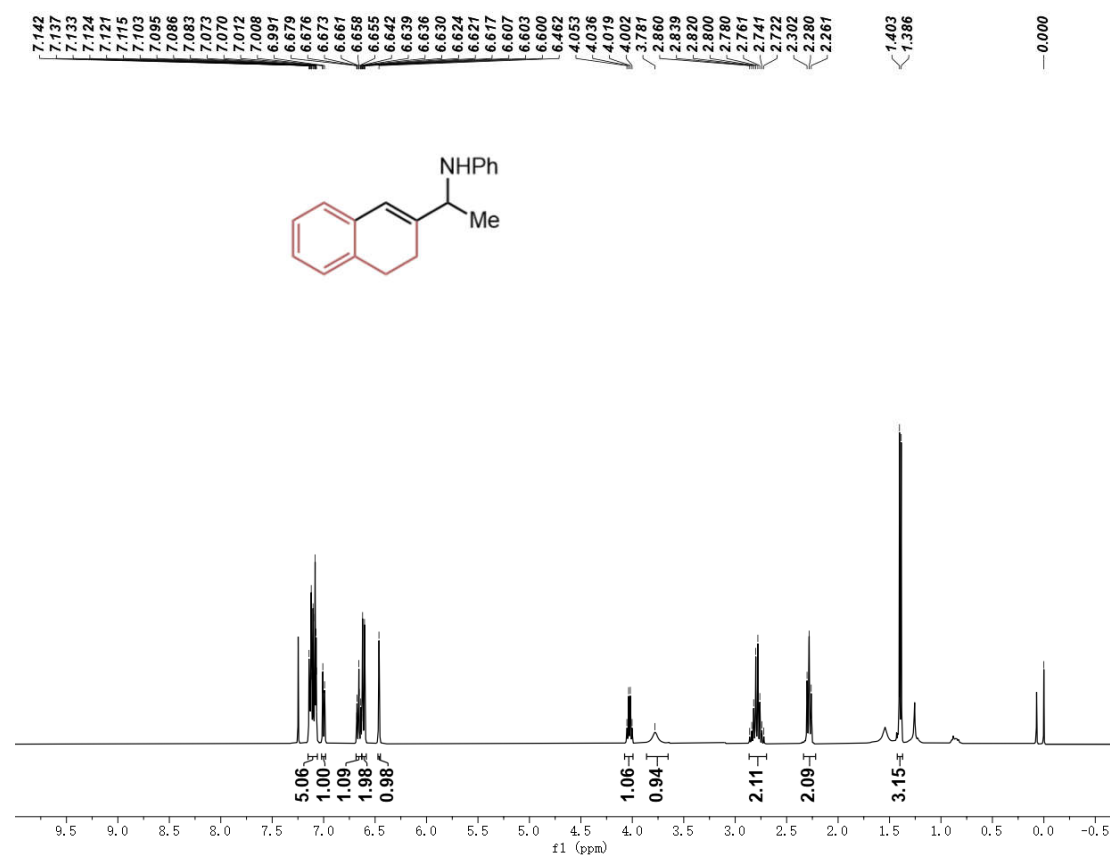

$^{13}\text{C}$  NMR (101 MHz,  $\text{CDCl}_3$ ) spectrum of **3ka**

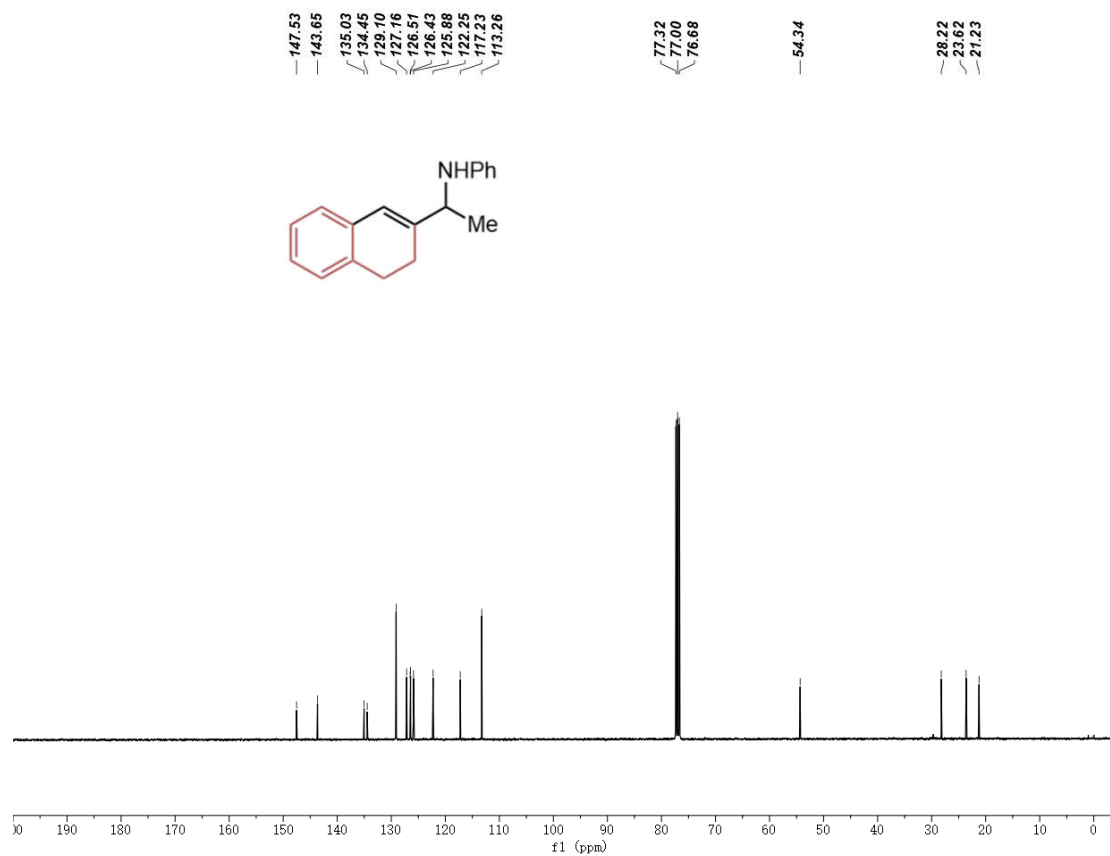

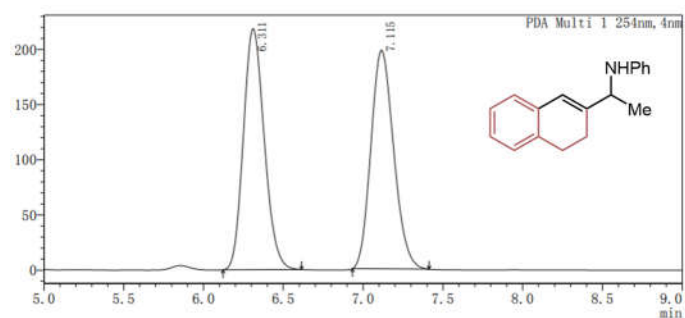

Entry Retention time Area Height Area%

PDA Ch1 254nm

| 峰号 | 保留时间  | 面积      | 高度     | 面积%     |
|----|-------|---------|--------|---------|
| 1  | 6.311 | 1990648 | 218452 | 50.226  |
| 2  | 7.115 | 1972709 | 198270 | 49.774  |
| 总计 |       | 3963357 | 416722 | 100.000 |

Total

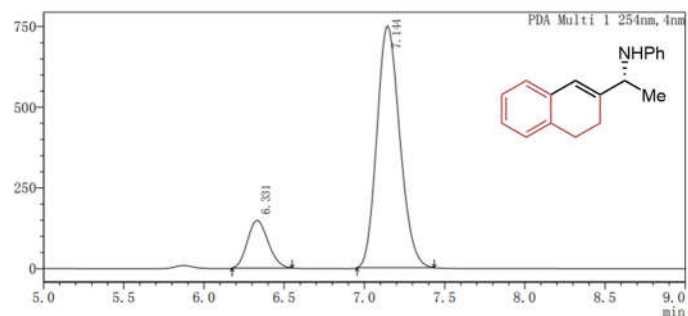

Entry Retention time Area Height Area%

PDA Ch1 254nm

| 峰号 | 保留时间  | 面积      | 高度     | 面积%     |
|----|-------|---------|--------|---------|
| 1  | 6.331 | 1319423 | 147369 | 15.052  |
| 2  | 7.144 | 7446240 | 749117 | 84.948  |
| 总计 |       | 8765663 | 896486 | 100.000 |

Total

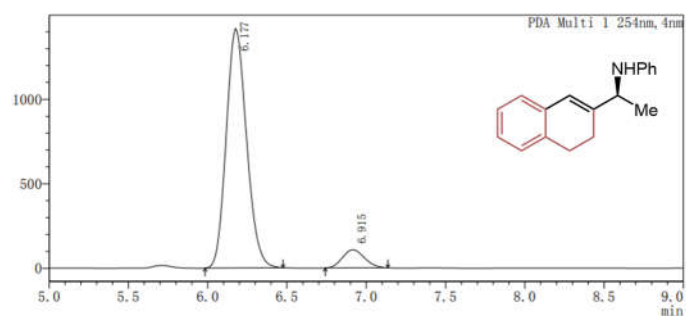

Entry Retention time Area Height Area%

PDA Ch1 254nm

| 峰号 | 保留时间  | 面积       | 高度      | 面积%     |
|----|-------|----------|---------|---------|
| 1  | 6.177 | 12630016 | 1417203 | 92.389  |
| 2  | 6.915 | 1040527  | 107466  | 7.611   |
| 总计 |       | 13670544 | 1524669 | 100.000 |

Total

$^1\text{H}$  NMR (400 MHz,  $\text{CDCl}_3$ ) spectrum of **3la**

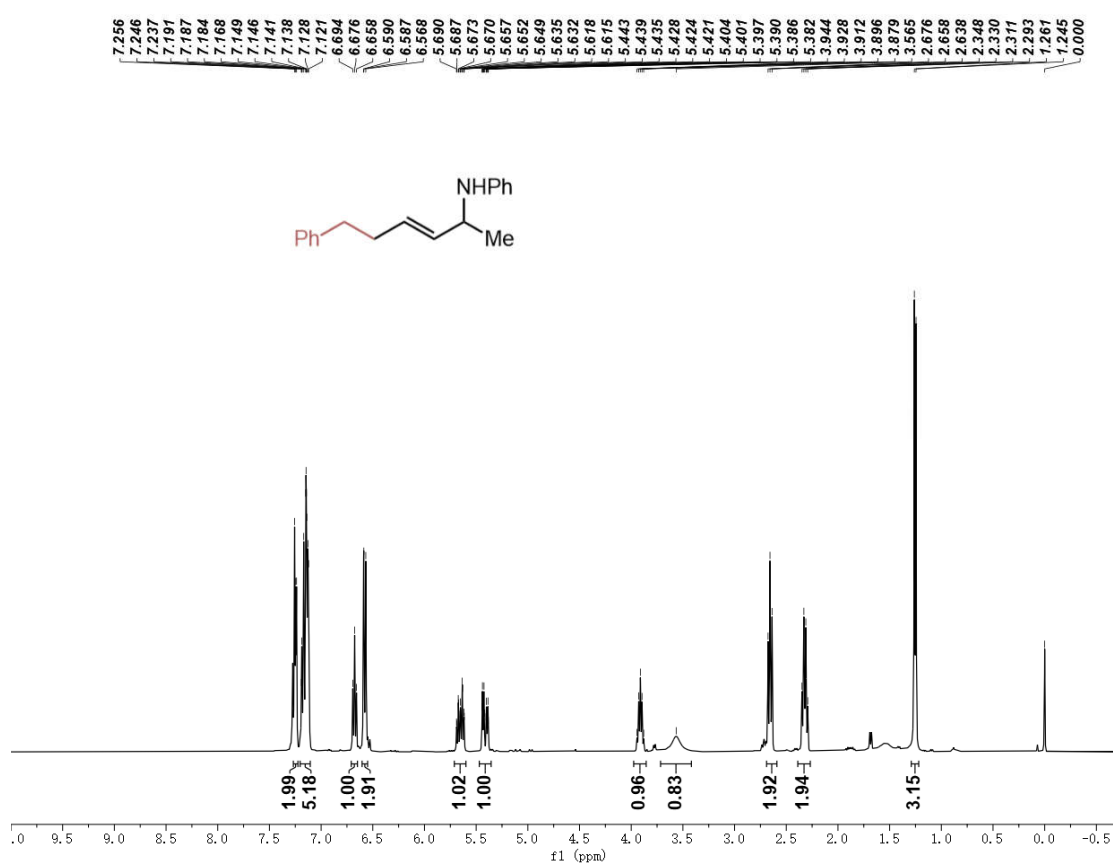

$^{13}\text{C}$  NMR (101 MHz,  $\text{CDCl}_3$ ) spectrum of **3la**

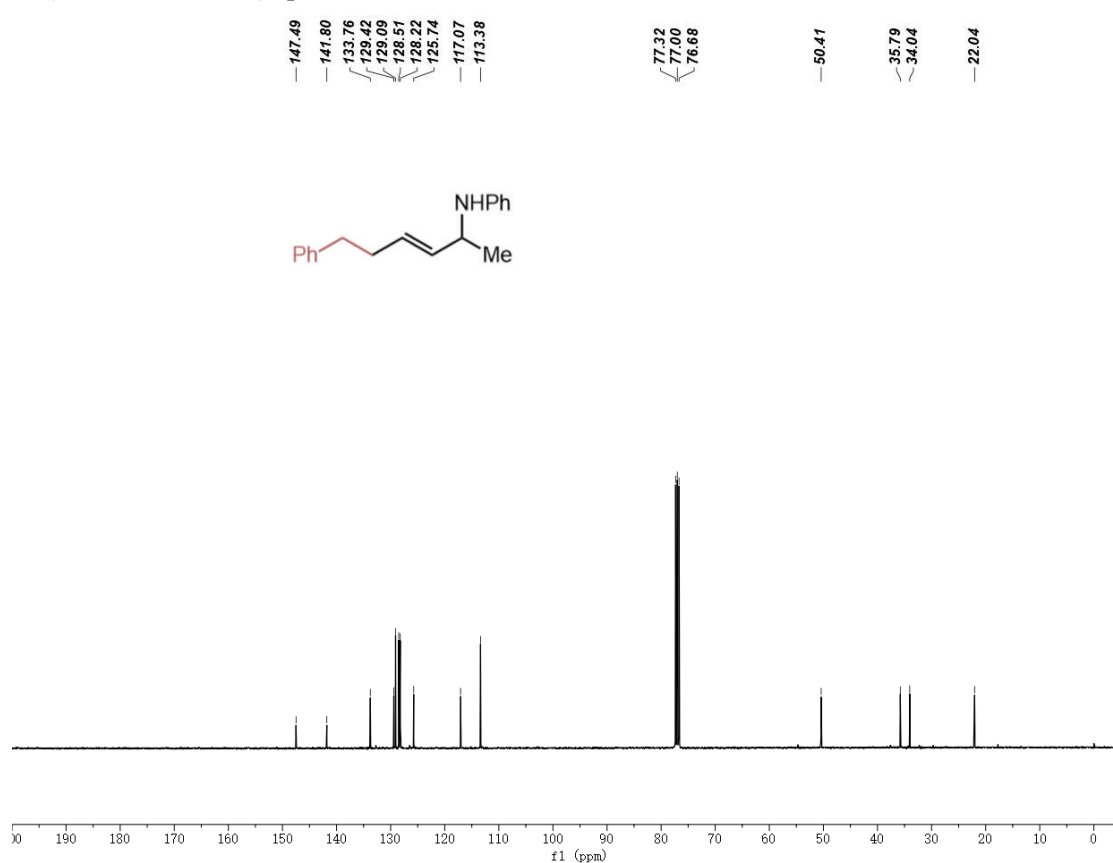

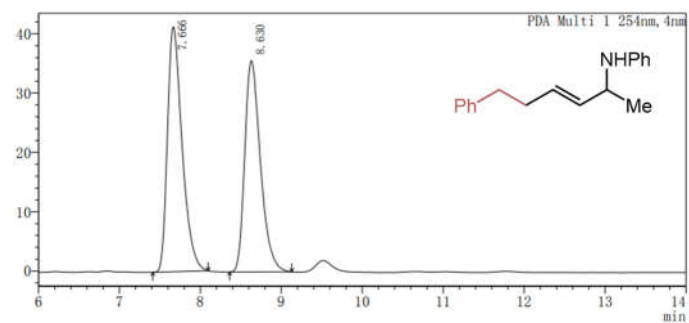

Entry Retention time Area Height Area%

PDA Ch1 254nm

| 峰号 | 保留时间  | 面积     | 高度    | 面积%     |
|----|-------|--------|-------|---------|
| 1  | 7.666 | 519527 | 41245 | 51.957  |
| 2  | 8.630 | 480382 | 35627 | 48.043  |
| 总计 |       | 999909 | 76872 | 100.000 |

Total

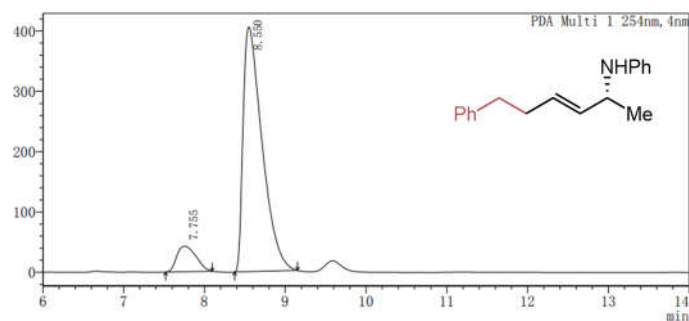

Entry Retention time Area Height Area%

PDA Ch1 254nm

| 峰号 | 保留时间  | 面积      | 高度     | 面积%     |
|----|-------|---------|--------|---------|
| 1  | 7.755 | 698904  | 42267  | 9.542   |
| 2  | 8.550 | 6625230 | 405174 | 90.458  |
| 总计 |       | 7324134 | 447441 | 100.000 |

Total

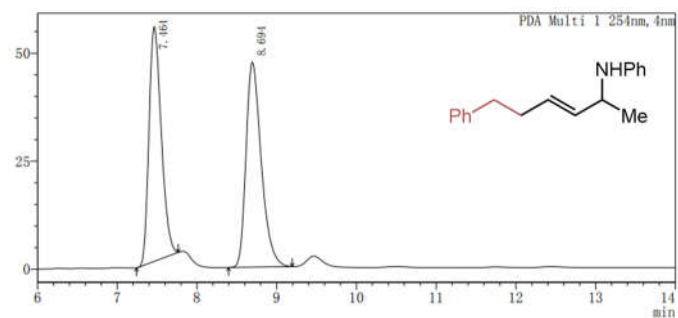

Entry Retention time Area Height Area%

PDA Ch1 254nm

| 峰号 | 保留时间  | 面积      | 高度     | 面积%     |
|----|-------|---------|--------|---------|
| 1  | 7.464 | 583317  | 54302  | 48.035  |
| 2  | 8.694 | 631029  | 47461  | 51.965  |
| 总计 |       | 1214346 | 101762 | 100.000 |

Total

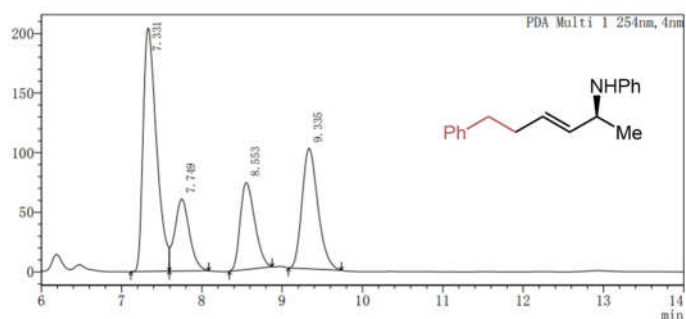

Entry Retention time Area Height Area%

PDA Ch1 254nm

| 峰号 | 保留时间  | 面积      | 高度     | 面积%     |
|----|-------|---------|--------|---------|
| 1  | 7.331 | 2370102 | 204061 | 43.474  |
| 2  | 7.749 | 766516  | 60367  | 14.060  |
| 3  | 8.553 | 922586  | 72963  | 16.923  |
| 4  | 9.335 | 1392537 | 101283 | 25.543  |
| 总计 |       | 5451741 | 438674 | 100.000 |

Total

$^1\text{H}$  NMR (400 MHz,  $\text{CDCl}_3$ ) spectrum of **3ma**

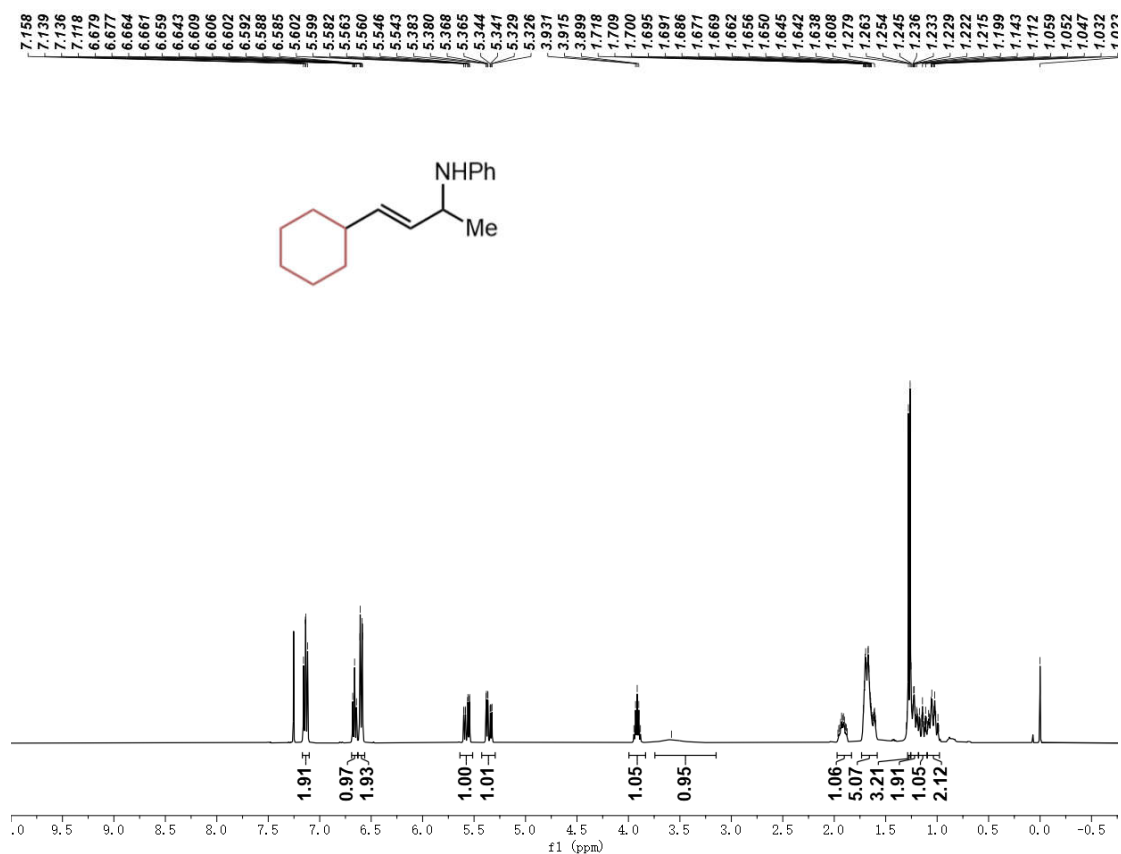

$^{13}\text{C}$  NMR (101 MHz,  $\text{CDCl}_3$ ) spectrum of **3ma**

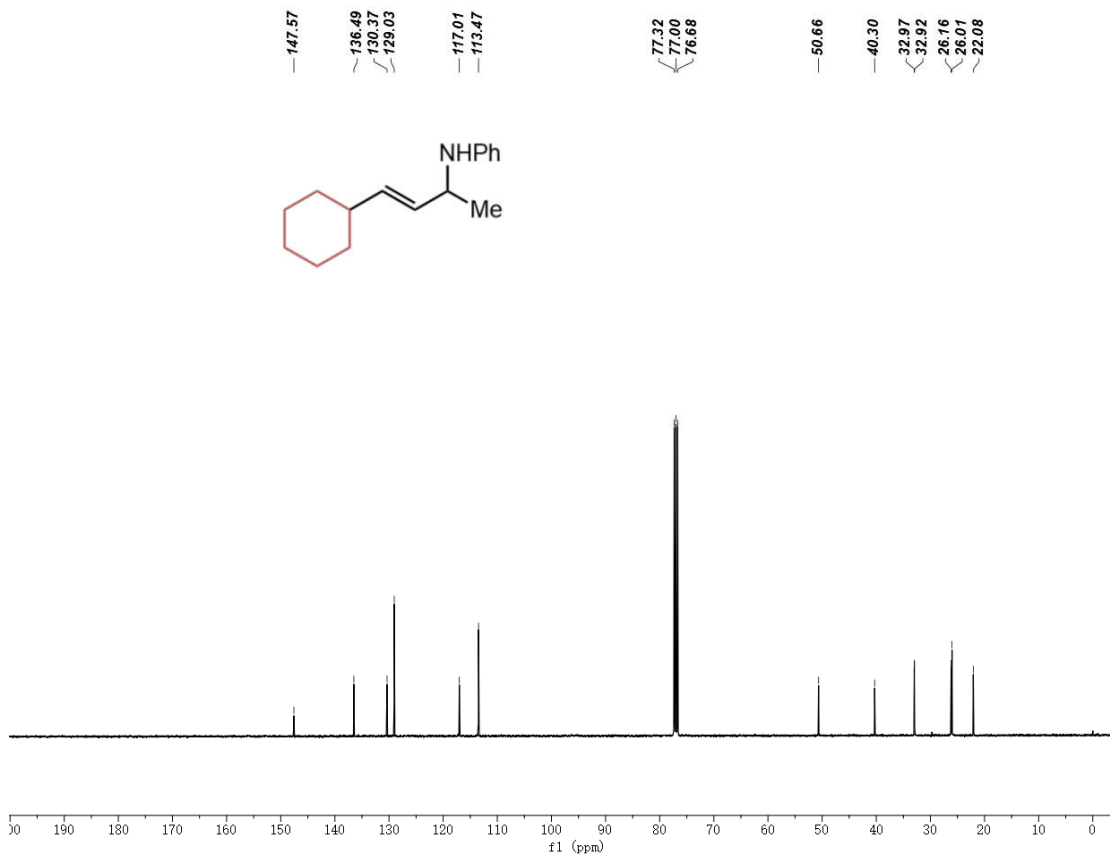

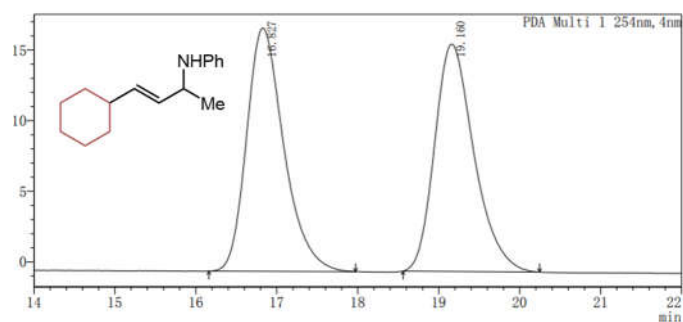

Entry Retention time Area Height Area%

PDA Ch1 254nm

| 峰号 | 保留时间   | 面积      | 高度    | 面积%     |
|----|--------|---------|-------|---------|
| 1  | 16.827 | 551601  | 17224 | 50.324  |
| 2  | 19.160 | 544490  | 16100 | 49.676  |
| 总计 |        | 1096091 | 33324 | 100.000 |

Total

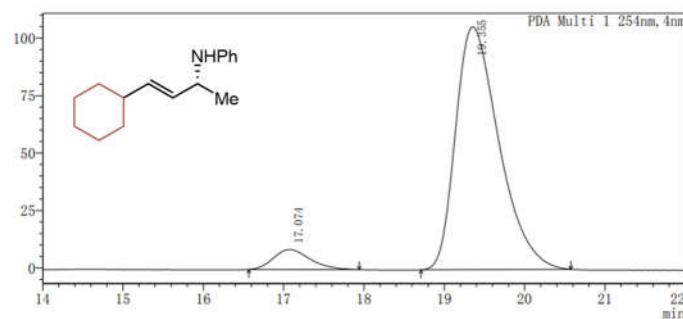

Entry Retention time Area Height Area%

PDA Ch1 254nm

| 峰号 | 保留时间   | 面积      | 高度     | 面积%     |
|----|--------|---------|--------|---------|
| 1  | 17.074 | 276717  | 8726   | 6.519   |
| 2  | 19.355 | 3968037 | 105622 | 93.481  |
| 总计 |        | 4244754 | 114349 | 100.000 |

Total

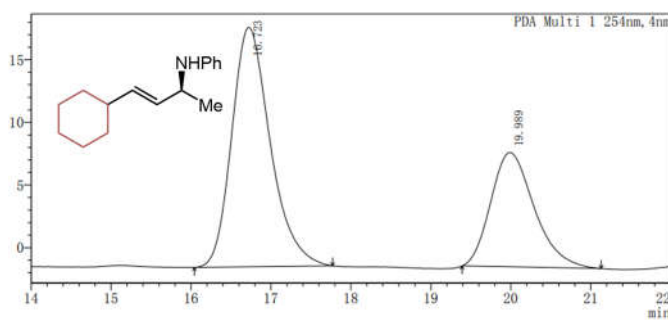

Entry Retention time Area Height Area%

PDA Ch1 254nm

| 峰号 | 保留时间   | 面积     | 高度    | 面积%     |
|----|--------|--------|-------|---------|
| 1  | 16.723 | 640641 | 19105 | 64.998  |
| 2  | 19.989 | 344997 | 9124  | 35.002  |
| 总计 |        | 985638 | 28228 | 100.000 |

Total
